# Supplementary material for: The DOAJ Spring Cleaning 2016 and What Was Removed &ndash; Tragic Loss or Good Riddance?
Source: Preprints.org preprint supplement (doi:10.20944/preprints201901.0238.v1), 2019-01-23
Supplement: Supplementary file 1 [file supplementary]

## Sheet: doaj_2014-02-07
ISSN combo	Title	Title Alternative	Identifier	Publisher	Language	ISSN	EISSN	Keyword	Start Year	End Year	Added on date	Subjects	Country	Publication fee	Further Information	CC License	Content in DOAJ
2160-584XZ	Motivational Interviewing : Training Research Implementation Practice		http://www.mitrip.org	University of Pittsburgh	English	2160-584X		motivational interviewing,psychotherapy	2012		2013-03-07T19:06:46Z	Therapeutics. Pharmacology,Medicine,Therapeutics,Medicine (General),Health Sciences	United States	N	http://www.mitrip.org/ojs/index.php/mitrip/about/submissions#authorGuidelines	by-nc-nd	Yes
2320-0251Z	International Journal of Advanced Ayurveda Yoga Unani Siddha and Homeopathy		http://medical.cloud-journals.com/index.php/IJAAYUSH	Cloud Publications	English	2320-0251		Ayurveda,Unani,Siddha,Yoga,homeopathy	2012		2013-04-06T21:16:59Z	Medicine (General),Medicine,Medicine (General),Health Sciences	India	Y	http://medical.cloud-journals.com/index.php/IJAAYUSH/about/submissions#authorGuidelines	by	Yes
1561-834XZ	Vestnik BGU. Seriâ 1 Fizika Matematika Informatika		http://www.elib.bsu.by/handle/123456789/2058	Belorusskij Gosudarstvennyj Universitet	Belarusian,Russian,English	1561-834X		physics,mathematics,informatics,optoelectronics,mathematical physics	2006		2013-08-03T18:43:07Z	Science (General),Science,Science (General),Science General	Belarus	N		by	Yes
2087-3379Z2088-6985	Mechatronics Electrical Power and Vehicular Technology		http://www.mevjournal.com/index.php/mev	Indonesian Institute of Sciences	English	2087-3379	2088-6985	mechanics. electronics,renewable energy,electric vehicle,transportation system	2010		2013-06-13T19:39:46Z	General Works,Multidisciplinary,General Works	Indonesia	N	http://www.mevjournal.com/index.php/mev/about/submissions#authorGuidelines	by-nc-sa	Yes
2320-1770Z2320-1789	International Journal of Reproduction Contraception Obstetrics and Gynecology		http://www.ijrcog.org	Medip Academy	English	2320-1770	2320-1789	infertility,family planning,sexual health,prenatal diagnosis,midwifery,perinatology,menopaus	2012		2013-08-17T09:00:36Z	Gynecology and obstetrics,Medicine,Gynecology and Obstetrics,Medicine (General),Health Sciences	India	Y	http://www.ijrcog.org/gauthors.php	by-nc-sa	Yes
1370-6233Z1780-4507	Biotechnologie Agronomie Société et Environnement	Biotechnology, Agronomy, Society and Environment (BASE)	http://www.bib.fsagx.ac.be/base/	University of Liege	English,French	1370-6233	1780-4507	forest sciences,earth science,forestry,agronomy,rural engineering,food technologies,biotechnology,agriculture	1997		2004-02-16T11:11:00Z	General Works,Multidisciplinary,General Works	Belgium	N	http://www.pressesagro.be/base/instruction.pdf	by-nc-sa	Yes
2220-7333Z	Postconvencionales : Ética Universidad Democracia		http://www.postconvencionales.org.ve/index.php/ethikos/index	Universidad Central de Venezuela	Spanish	2220-7333		moral development,moral psychology,ethics,democracy,higher education	2010		2011-02-08T12:37:29Z	Ethics,Philosophy. Psychology. Religion,Philosophy,Philosophy and Religion	Venezuela	N	http://www.postconvencionales.org.ve/index.php/ethikos/about/submissions#authorGuidelines	by-nc-sa	Yes
2221-6529Z2223-8379	Journal of Engineering Project and Production Management		http://www.ppml.url.tw/EPPM_Journal/	Association of Engineering, Project, and Production Management	English	2221-6529	2223-8379	engineering management,project management,production management	2011		2012-08-19T08:06:49Z	Industrial engineering. Management engineering,Technology (General),Technology,Industrial Engineering,Technology and Engineering	Taiwan	N	http://www.ppml.url.tw/EPPM_Journal/submission.htm	by-nc-nd	Yes
1818-9172Z1818-9210	Pedagogics Psychology Medical-Biological Problems of Physical Training and Sports	Pedagogìka, Psihologìâ ta Mediko-Bìologìčnì Problemi Fìzičnogo Vihovannâ ì Sportu	http://www.sportpedagogy.org.ua	Kharkov Regional Branch of the National Olympic Committee of Ukraine	Ukrainian,Russian,Polish,English	1818-9172	1818-9210	physical education,medicine,biology,physical recreation	2009		2011-09-19T14:45:01Z	Special aspects of education,Education,Education,Social Sciences,Sports,Recreation. Leisure,Geography. Anthropology. Recreation,Sports Science,Social Sciences	Ukraine	N	http://www.sportpedagogy.org.ua/html/trebovaniya-e.html	by-nc-nd	Yes
1927-9434Z	International Journal of Engineering Social Justice and Peace		http://library.queensu.ca/ojs/index.php/IJESJP/index	International Journal of Engineering, Social Justice, and Peace	English	1927-9434		social justice,engineering education,equality,democracy	2012		2013-10-17T16:51:07Z	Engineering (General). Civil engineering (General),Technology,General and Civil Engineering,Technology and Engineering,Ethics,Philosophy. Psychology. Religion,Philosophy,Philosophy and Religion	Canada	N	http://library.queensu.ca/ojs/index.php/IJESJP/about/submissions#authorGuidelines	by-nc-nd	Yes
1729-7036Z	Strategy of Ukraine : Economics Sociology Law	Strategìâ Rozvitku Ukraïni	http://jrnl.nau.edu.ua/index.php/SR	National Aviation University	Ukrainian	1729-7036		economics,sociology,law	2010		2013-08-30T15:32:10Z	Economic theory. Demography,Social Sciences,Economics,Business and Economics	Ukraine	Y	http://jrnl.nau.edu.ua/index.php/SR/about/submissions#authorGuidelines	by-nc-nd	Yes
2171-6897Z2173-1616	Proyecto Progreso Arquitectura		http://revistas.ojs.es/index.php/ppa/index	Universidad de Sevilla	Spanish	2171-6897	2173-1616	restoration of buildings,city planning	2010		2011-10-17T17:59:14Z	Architecture,Fine Arts,Architecture,Arts and Architecture	Spain	N	http://revistas.ojs.es/index.php/ppa/about/submissions#authorGuidelines	by-nc	Yes
2036-1599Z	Danza e Ricerca : Laboratorio di Studi Scritture Visioni		http://danzaericerca.cib.unibo.it/	University of Bologna	Italian	2036-1599		dancing,theatre,cultural history,choreography,ballet	2009		2012-01-20T11:39:52Z	Dancing,Recreation. Leisure,Geography. Anthropology. Recreation,Performing Arts,Arts and Architecture	Italy	N	http://danzaericerca.unibo.it/about/submissions#authorGuidelines	by-nc	Yes
0104-5970Z1678-4758	História Ciências Saúde-Manguinhos		http://www.scielo.br/scielo.php/script_sci_serial/pid_0104-5970/lng_en/nrm_iso	Casa de Oswaldo Cruz, Fundação Oswaldo Cruz	Spanish,Portuguese,English,French	0104-5970	1678-4758	health sciences,human sciences	1994		2004-04-23T21:31:00Z	Medicine (General),Medicine,Medicine (General),Health Sciences	Brazil	N	http://www.scielo.br/revistas/hcsm/iinstruc.htm	by-nc	Yes
1687-4714Z1687-4722	EURASIP Journal on Audio Speech and Music Processing		http://asmp.eurasipjournals.com/	Springer	English	1687-4714	1687-4722	audio signals,speech communication,audio processes	2006		2006-09-04T15:56:34Z	Acoustics. Sound,Physics,Science,Acoustics,Physics (General),Physics and Astronomy	Germany	Y	http://asp.eurasipjournals.com/manuscript	by	Yes
1747-597XZ	Substance Abuse Treatment Prevention and Policy		http://www.substanceabusepolicy.com/	BioMed Central	English	1747-597X		substance abuse,drug abuse	2006		2006-02-20T10:31:58Z	Public aspects of medicine,Medicine,Public Health,Health Sciences	United Kingdom	Y	http://www.substanceabusepolicy.com/about#apc	by	Yes
1747-5341Z	Philosophy Ethics and Humanities in Medicine		http://www.peh-med.com/	BioMed Central	English	1747-5341		medicine,bioethics	2006		2005-08-02T16:24:58Z	Medical philosophy. Medical ethics,Medicine (General),Medicine,Medicine (General),Health Sciences	United Kingdom	Y	http://www.peh-med.com/about#apc	by	Yes
2160-1836Z	G3 : Genes Genomes Genetics		http://www.g3journal.org	Genetics Society of America	English	2160-1836		genetics,genomics	2011		2012-02-10T08:03:50Z	Genetics,Biology (General),Science,Genetics,Biology,Biology and Life Sciences	United States	Y	http://www.g3journal.org/site/misc/IFA-G3.pdf	by	Yes
2222-6532Z	Sovremennaâ Ekonomika : Problemy Tendencii Perspektivy		http://www.meconomics.org/	Vladimir State University	Russian,English	2222-6532		management,economic mathematics,marketing,logistics	2008		2012-07-04T09:33:50Z	Economic theory. Demography,Social Sciences,Economics,Business and Economics	Russia	N	http://www.meconomics.org/#!projects/ctzx	by	Yes
2008-210XZ2008-2118	Journal of Dental Research Dental Clinics Dental Prospects		http://dentistry.tbzmed.ac.ir/joddd/index.php/joddd/index	Tabriz University of Medical Sciences	English	2008-210X	2008-2118	oral health,dental caries	2007		2009-08-26T16:12:56Z	Dentistry,Medicine,Dentistry,Health Sciences	Iran	N	http://dentistry.tbzmed.ac.ir/joddd/index.php/joddd/about/submissions	by	Yes
1687-9228Z1687-9236	Journal of Atomic Molecular and Optical Physics		http://www.hindawi.com/journals/jamop/	Hindawi Publishing Corporation	English	1687-9228	1687-9236	atomic physics,molecular physics,optical physics	2009		2011-08-24T13:57:22Z	Physics,Science,Physics (General),Physics and Astronomy	Egypt	Y	http://www.hindawi.com/journals/jamop/apc.html	by	Yes
1925-1270Z	Intersectionalities : A Global Journal of Social Work Analysis Research Polity and Practice		http://journals.library.mun.ca/IJ/	Memorial University of Newfoundland	English	1925-1270		social work,social justice,public policy	2012		2013-06-12T21:14:38Z	Social pathology. Social and public welfare. Criminology,Social Sciences,Social and Public Welfare,Sociology,Social Sciences	Canada	N	http://journals.library.mun.ca/ojs/index.php/IJ/about/submissions#authorGuidelines	by	Yes
1521-2300Z	Kairos : Journal of Rhetoric Technology and Pedagogy		http://kairos.technorhetoric.net/	Kairos	English	1521-2300		webbased learning	1996		2003-09-24T00:00:00Z	Special aspects of education,Education,Education,Social Sciences	United States	N	http://kairos.technorhetoric.net/cfht.html		Yes
1555-1229Z1555-1237	Interdisciplinary Journal of Information Knowledge and Management		http://www.ijikm.org/	Informing Science Institute	English	1555-1229	1555-1237	information technology,information management,knowledge management,organizational learning	2006		2006-04-07T09:55:28Z	Electronic computers. Computer science,Instruments and machines,Mathematics,Science,Computer Science,Technology and Engineering,Bibliography. Library science. Information resources,Library and Information Science,Social Sciences	United States	N	http://www.informingscience.us/icarus/journals/ijikm/submitpaper		Yes
0067-3064Z1648-858X	Baltica : An International Yearbook for Quaternary Geology and Palaeogeography Coastal Morphology and Shore Processes Marine Geology and Recent Tectonics of the Baltic Sea Area		http://www.geo.lt/geo/index.php?id=710	Lithuanian Academy of Sciences	English	0067-3064	1648-858X	quaternary geology,climate changes,ecosystems,palaeogeography,environmental geology,tectonics,sedimentology,surface processes,Baltic sea	2002		2005-03-16T14:19:53Z	Geology,Science,Earth Sciences,Earth and Environmental Sciences,Oceanography,Geography. Anthropology. Recreation,Oceanography,Earth and Environmental Sciences	Lithuania	NY			Yes
1557-0266Z	Globality Studies Journal : Global History Society Civilization		http://www.stonybrook.edu/globality/	Stony Brook University	English	1557-0266		globality,globalization,global regions,global history,global society	2006		2007-08-09T09:56:15Z	General Works,Multidisciplinary,General Works	United States	N	http://globality.cc.stonybrook.edu/?page_id=20		Yes
1844-8143Z1844-9166	Aquaculture Aquarium Conservation & Legislation	AACL Bioflux	http://www.bioflux.com.ro/aacl	Bioflux	English	1844-8143	1844-9166	aquaculture,aquarium,conservation,legislation,ecology	2008		2008-11-11T16:33:04Z	Aquaculture. Fisheries. Angling,Agriculture,Aquaculture and Fisheries,Agriculture and Food Sciences	Romania	Y	http://www.bioflux.com.ro/fisiere/instructions.doc		Yes
1224-3884Z2068-4762	Bulletin of the Polytechnic Institute of Jassy Constructions Architechture Section		http://www.bipcons.ce.tuiasi.ro/	Gheorghe Asachi Technical University of Jassy	English,French	1224-3884	2068-4762	concrete structures,building materials,technology,composite structures,geotechnical engineering,structural mechanics	2004		2009-10-07T11:23:48Z	Engineering (General). Civil engineering (General),Technology,General and Civil Engineering,Technology and Engineering,Architecture,Fine Arts,Architecture,Arts and Architecture	Romania	N	http://www.bipcons.ce.tuiasi.ro/Content/AuthorsGuidelines.php		Yes
2067-8177Z	BRAND : Broad Research in Accounting Negotiation and Distribution		http://brand.edusoft.ro	EduSoft Publishing Bacau	English	2067-8177		accounting,operations research,marketing,sociology,political communication	2010		2010-04-19T10:46:55Z	Economic theory. Demography,Social Sciences,Economics,Business and Economics	Romania	N	http://www.edusoft.ro/brain/index.php/brand/about/submissions#authorGuidelines		Yes
0039-3991Z2067-5119	Studii si Cercetari de Istoria Artei : Teatru Muzică Cinematografie	SCIA.TMC : Studii si Cercetari de Istoria Artei. Teatru, Muzica, Cinematografie	http://www.scia.istoria-artei.ro/	Romanian Academy	Romanian,French,English	0039-3991	2067-5119	performing arts,theatre,history of theatre,musicology,history of music,cinema,film	2007		2010-10-29T13:31:43Z	Drama,Literature (General),Language and Literature,Performing Arts,Arts and Architecture,Music,Music and books on Music,Music,Arts and Architecture	Romania	N	http://www.scia.istoria-artei.ro/guidelines-for-authors.php		Yes
1792-2518Z	Hellenic Journal of Music Education and Culture	HeJMEC : Hellenic Journal of Music, Education & Culture	http://www.hejmec.eu	Greek Association of Primary Music Education Teachers	English,Greek	1792-2518		music education,teaching	2010		2011-04-04T15:33:48Z	Education (General),Education,Education,Social Sciences,Musical instruction and study,Music and books on Music,Music,Arts and Architecture	Greece	N	http://hejmec.eu/ojs-2.2.4/index.php/HeJMEC/about/submissions#authorGuidelines		Yes
1951-6789Z	Mémoire(s) Identité(s) Marginalité(s) dans le Monde Occidental Contemporain	Cahiers du MIMMOC	http://mimmoc.revues.org/	Université de Poitiers	French,English	1951-6789		humanities,social sciences,history,identity,contemporary Europe	2006		2012-11-26T09:41:25Z	Social sciences (General),Social Sciences,Social Sciences	France	N	http://mimmoc.revues.org/66		Yes
1812-9471Z1817-5805	Journal of Mathematical Physics Analysis Geometry	MAG	http://jmage.ilt.kharkov.ua/mag_e.html	National Academy of Sciences of Ukraine	Russian,English,Ukrainian	1812-9471	1817-5805	mathematical physics,mathematical analysis,geometry	2005		2006-03-29T11:46:22Z	Mathematics,Science,Mathematics,Mathematics and Statistics	Ukraine	N	http://jmage.ilt.kharkov.ua/rule.html		Yes
1735-0344Z2345-3729	Tanaffos : Journal of Respiratory Disease Thoracic Surgery Intensive Care and Tuberculosis		http://www.tanaffosjournal.ir/	Shaheed Beheshti University of Medical Sciences	English	1735-0344	2345-3729	respiratory diseases,tuberculosis,intensive care,thoracic surgery	2002		2007-05-02T18:05:53Z	Diseases of the respiratory system,Specialties of internal medicine,Internal medicine,Medicine,Internal medicine,Medicine (General),Health Sciences	Iran	N	http://www.tanaffosjournal.ir/en/page.php?rid=4		Yes
1942-5120Z	Marine and Coastal Fisheries : Dynamics Management and Ecosystem Science		http://www.tandfonline.com/toc/umcf20/current	American Fisheries Society	English	1942-5120		fishing,estuarine fisheries,aquatic ecosystems	2009		2009-05-08T18:08:09Z	Aquaculture. Fisheries. Angling,Agriculture,Aquaculture and Fisheries,Agriculture and Food Sciences	United States	Y	http://www.tandfonline.com/action/authorSubmission?journalCode=umcf20&page=instructions		Yes
0717-6759Z0717-8980	Estado Gobierno Gestión Pública	Revista Chilena de Administración Pública	http://www.revistaeggp.uchile.cl/	Departamento de Gobierno y Gestión Pública, Instituto de Asuntos Públicos, Universidad de Chile	Spanish,English	0717-6759	0717-8980	public administration,public policies,public management,administrative reforms,Latin America	2002		2009-03-13T15:15:21Z	Social sciences (General),Social Sciences,Social Sciences	Chile	N	http://www.revistaeggp.uchile.cl/index.php/REGP/about/submissions#authorGuidelines		Yes
1708-6310Z	Enfances Familles Générations		http://www.efg.inrs.ca/index.php/EFG	Institut National de la Recherche Scientifique (INRS)	French	1708-6310		family,children,generations	2004		2008-05-21T11:00:40Z	Sociology (General),Social Sciences,Sociology,Social Sciences	Canada	N	http://www.efg.inrs.ca/index.php/EFG/about/submissions#authorGuidelines		Yes
1950-1684Z1775-397X	Transcontinentales : Sociétés Idéologies Système Mondial		http://transcontinentales.revues.org	Fondation de la Maison des Sciences de l'Homme	French,English	1950-1684	1775-397X	area studies,social sciences,international relations	2006		2012-04-02T14:14:13Z	Social sciences (General),Social Sciences,Social Sciences	France	N	http://transcontinentales.revues.org/347		Yes
0017-3916Z2159-3159	Greek Roman and Byzantine Studies		http://grbs.library.duke.edu/index	Duke University	English	0017-3916	2159-3159	antiquity,Byzantium,history of Greece,Greek culture,Greek literature	2004		2011-03-04T14:54:44Z	Ancient history,History (General),History (General) and history of Europe,History,History and Archaeology	United States	N	http://grbs.library.duke.edu/about/submissions#authorGuidelines		Yes
1824-4483Z	DEP. Deportate Esuli Profughe	Rivista telematica di studi sulla memoria femminile	http://www.unive.it/dep	Università Ca’ Foscari	Italian,English,Spanish,French	1824-4483		women in exile,refugees,deportees	2004		2006-10-26T14:20:18Z	Social pathology. Social and public welfare. Criminology,Social Sciences,Social and Public Welfare,Sociology,Social Sciences	Italy	N	http://www.nqcontent.cfm?a_id=19901		Yes
0561-7332Z	Bulletin Classes des Sciences Mathematiques et Naturelles Sciences Mathématiques		http://www.emis.de/journals/BSANU/index.html	Académie Serbe des Sciences et des Arts	English	0561-7332		mathematics	2001		2004-05-07T11:35:57Z	Mathematics,Science,Mathematics,Mathematics and Statistics	Serbia	NY			Yes
1525-3120Z	Enculturation: a Journal of Rhetoric Writing and Culture		http://enculturation.gmu.edu/	George Mason University	English	1525-3120		theorizations,rhetoric,writing,culture	1997		2004-06-22T12:33:18Z	General Works,Multidisciplinary,General Works	United States	NY	http://enculturation.gmu.edu/submission_guidelines		Yes
0186-6036Z	Tecnología Ciencia Educación		http://www.redalyc.org/revista.oa?id=482	Instituto Mexicano de Ingenieros Químicos	Spanish	0186-6036		chemical engineering	2000		2007-11-02T14:35:17Z	Chemical engineering,Chemical technology,Technology,Chemical Engineering,Chemistry	Mexico	Y	http://redalyc.org/redalyc/media/normas/normcol482.html		Yes
1957-7796Z	Revue de la Régulation : Capitalisme Institutions Pouvoirs		http://regulation.revues.org	Association Recherche & Régulation	French,English	1957-7796		regulation theory,heterodox economics,economic crisis	2007		2009-06-24T16:43:28Z	Economic theory. Demography,Social Sciences,Economics,Business and Economics	France	N	http://regulation.revues.org/index1701.html		Yes
1583-2074Z	Annals of Dunarea de Jos University of Galati Fascicle XVII Medicine		http://www.med.ugal.ro/annals.htm	Dunarea de Jos University of Galati	English,French	1583-2074		pathology,pharmacy,dentistry	2010		2011-09-09T18:15:18Z	Medicine (General),Medicine,Medicine (General),Health Sciences	Romania	N	http://www.med.ugal.ro/Facultatea%20de%20Medicina%20si%20Farmacie%20Galati%20_eng/medical%20journal/INSTRUCTION%20FOR%20AUTHORS.htm		Yes
2010-3654Z	International Journal of e-Education e-Business e-Management and e-Learning	IJEEEE	http://www.ijeeee.org/	IACSIT Press	English	2010-3654		education,business,learning,commerce	2011		2013-05-20T21:27:23Z	General Works,Multidisciplinary,General Works	Singapore	CON	http://www.ijeeee.org/list-17-1.html		Yes
1923-1660Z	Canadian Journal on Computing in Mathematics Natural Sciences Engineering and Medicine		http://www.ampublisher.com/Canadian-Journal-Computing.html	AM Publishers Corp	English	1923-1660		physics,environment,computer networks,technology	2010		2013-05-07T16:57:57Z	General Works,Multidisciplinary,General Works	Canada	Y	http://www.ampublisher.com/Canadian-Journal-Computing.html		Yes
1414-3283Z1807-5762	Interface : Comunicação Saúde Educação	Interface : Communication, Health, Education	http://www.interface.org.br/	Fundação UNI	Portuguese,English,Spanish	1414-3283	1807-5762	health,humanities,communication	1997		2004-05-17T17:09:41Z	Education (General),Education,Education,Social Sciences	Brazil	N	http://www.interface.org.br/ingles/normas.asp		Yes
1557-1319Z1557-1327	Journal of Information Information Technology and Organizations		http://jiito.org/	Informing Science Institute	English	1557-1319	1557-1327	information systems research	2006		2006-09-29T16:17:14Z	Bibliography. Library science. Information resources,Library and Information Science,Social Sciences,Information technology,Industrial engineering. Management engineering,Technology (General),Technology,Computer Science,Technology and Engineering	United States	N	http://www.iiakm.org/jiito/subrev.php		Yes
1684-5358Z1684-5374	African Journal of Food Agriculture Nutrition and Development	AJFAND	http://www.bioline.org.br/nd	Rural Outreach Program	English	1684-5358	1684-5374	nutrition,Africa,farming	2002		2007-09-07T16:13:02Z	Agriculture (General),Agriculture,Agriculture (General),Agriculture and Food Sciences	Kenya	N	http://www.bioline.org.br/info?id=nd&doc=instr		Yes
2107-0806Z	Amerika : Mémoires Identités Territoires		http://amerika.revues.org	Université de Rennes 2	French,Spanish,Portuguese,English	2107-0806		area studies,American studies,Latin American studies	2010		2012-02-02T15:33:29Z	General Works,Multidisciplinary,General Works	France	N	http://amerika.revues.org/749		Yes
1929-5855Z	The English Languages : History Diaspora Culture		http://jps.library.utoronto.ca/index.php/elhdc/issue/archive	The English Languages : History, Diaspora, Culture	English	1929-5855		variation,foreign countries,standardization,social aspects,dialects	2010		2013-05-31T19:32:44Z	English language,Language and Literature,Languages and Literatures,History (General),History (General) and history of Europe,History,History and Archaeology	Canada	N	http://jps.library.utoronto.ca/index.php/elhdc/about/submissions#authorGuidelines		Yes
1805-5443Z	International Journal of Advances in Telecommunications Electrotechnics Signals and Systems		http://www.ijates.org	International Science and Engineering Society, o.s.	English	1805-5443		audio-video signal processing,biomedical signal processing,telecommunication systems,communication,network service,modeling	2012		2013-08-13T14:06:52Z	Electrical engineering. Electronics. Nuclear engineering,Technology,Electrical and Nuclear Engineering,Technology and Engineering	Czech Republic	N	http://www.ijates.org/index.php/ijates/about/submissions#authorGuidelines		Yes
1832-2050Z	Studies in Learning Evaluation Innovation and Development		http://www.sleid.cqu.edu.au/index.php	Central Queensland University	English	1832-2050		teaching	2004		2005-02-23T10:22:01Z	Theory and practice of education,Education,Education,Social Sciences	Australia	N	http://www.sleid.cqu.edu.au/submissions.php#guidelines		Yes
1582-540XZ	Scientific Study & Research. Chemistry & Chemical Engineering Biotechnology Food Industry	Studii şi Cercetări Stiinţifice. Chimie şi Inginerie Chimică, Biotehnologii, Industrie Alimentară	http://pubs.ub.ro/?pg=revues&rev=cscc6	University Vasile Alecsandri of Bacãu	English,French	1582-540X		chemistry,chemical engineering,biotechnology,food science,food technology	2010		2010-10-19T14:48:01Z	Chemical technology,Technology,Chemical Technology,Technology and Engineering	Romania	N	http://pubs.ub.ro/?pg=revues&rev=cscc6&sc=instructions		Yes
1784-5092Z	CeROArt : Conservation Exposition Restauration d'Objets d'Art		http://ceroart.revues.org/	CeROArt	French,English	1784-5092		conservation of art objects,restoration of art objects,exhibitions,cultural heritage,museums	2007		2010-05-12T11:14:10Z	Arts in general,Fine Arts,Arts in general,Arts and Architecture	Belgium	N	http://ceroart.revues.org/index87.html		Yes
2093-5374Z2093-5382	Journal of Wireless Mobile Networks Ubiquitous Computing and Dependable Applications		http://jowua.yolasite.com/	Innovative Information Science & Technology Research Group	English	2093-5374	2093-5382	wireless mesh networks,user interfaces,software infrastructures	2010		2012-12-15T19:14:49Z	Electronic computers. Computer science,Instruments and machines,Mathematics,Science,Computer Science,Technology and Engineering	South Korea	CON	http://jowua.yolasite.com/submission.php		Yes
2321-8649Z2321-9289	Journal of Nuclear Physics Material Sciences Radiation and Applications		http://jnp.chitkara.edu.in/	Chitkara University	English	2321-8649	2321-9289	nuclear physics,material science,radiation physics	2013		2013-11-04T15:38:18Z	Physics,Science,Physics (General),Physics and Astronomy	India	N	http://jnp.chitkara.edu.in/pdf/Author's%20Instruction_JNP.pdf		Yes
1531-7714Z	Practical Assessment Research & Evaluation		http://pareonline.net/	Practical Assessment, Research & Evaluation	English	1531-7714		psychology	1988		2004-01-07T00:00:00Z	Theory and practice of education,Education,Education,Social Sciences	United States	N	http://pareonline.net/Policies.htm		Yes
1980-0894Z	Interfacehs : Journal of Health Environment and Sustainability		http://www.interfacehs.sp.senac.br	Senac – Serviço Nacional de Aprendizagem Comercial	English,Portuguese,French	1980-0894		integrated management,occupational health,the environment	2006		2008-02-13T13:43:10Z	Environmental sciences,Geography. Anthropology. Recreation,Environmental Sciences,Earth and Environmental Sciences	Brazil	N	http://www.revistas.sp.senac.br/index.php/ITF/about/submissions#authorGuidelines		Yes
1807-9792Z	Abstracta : Linguagem Mente e Ação		http://www.abstracta.pro.br/	Abstracta	English,Portuguese	1807-9792		philosophy of mind,philosophy of science,ethics	2004		2007-05-09T14:05:38Z	Philosophy (General),Philosophy. Psychology. Religion,Philosophy,Philosophy and Religion	Brazil	N	http://abstracta.oa.hhu.de/index.php/abstracta/about/submissions#authorGuidelines		Yes
0864-0289Z1561-2996	Revista Cubana de Hematología Inmunología y Hemoterapia		http://scielo.sld.cu/scielo.php?script=sci_serial&pid=0864-0289&lng=en&nrm=iso	Editorial Ciencias Médicas	Spanish	0864-0289	1561-2996	hematology,immunology,hemotherapy	1999		2005-03-30T10:41:49Z	Internal medicine,Medicine,Internal medicine,Medicine (General),Health Sciences	Cuba	N	http://scielo.sld.cu/revistas/hih/iinstruc.htm		Yes
1841-9836Z1841-9844	International Journal of Computers Communications & Control	IJCCC	http://univagora.ro/jour/index.php/ijccc/	Agora University of Oradea	English	1841-9836	1841-9844	computing,communication,control	2006		2006-05-30T13:25:27Z	Mathematics,Science,Mathematics,Mathematics and Statistics,Electronic computers. Computer science,Instruments and machines,Mathematics,Science,Computer Science,Technology and Engineering	Romania	N	http://univagora.ro/jour/index.php/ijccc/about/submissions#authorFees		Yes
1696-4713Z	Revista Electrónica Iberoamericana sobre Calidad Eficacia y Cambio en Educación		http://www.rinace.net/reice/	Red Iberoamericana de Investigación sobre Cambio y Eficacia Escolar (RINACE)	Spanish,Portuguese,English	1696-4713		education,quality,effectiveness,educational change	2003		2005-10-18T10:50:38Z	Education (General),Education,Education,Social Sciences	Spain	N	http://www.rinace.net/reiceaport.htm		Yes
1971-033XZ	Rivista di Criminologia Vittimologia e Sicurezza	The Criminology, Victimology and Security Review	http://www.vittimologia.it/rivista/	Società Italiana di Vittimologia	Italian,French,English	1971-033X		criminology,victimology,security,crime victims,criminality	2007		2008-06-23T17:08:23Z	Criminal law and procedure,Comparative law. International uniform law,Law in general. Comparative and uniform law. Jurisprudence,Law,Law,Law and Political Science	Italy	N	http://www.vittimologia.it/rivista/linee_guida_editoriali_page_en.htm		Yes
1307-6086Z	Necatibey Faculty of Education Electronic Journal of Science and Mathematics Education	Necatibey Egitim Fakultesi Elektronik Fen ve Matematik Egitimi Dergisi (NEF-EFMED)	http://nef.efmed.balikesir.edu.tr	Necatibey Faculty of Education	Turkish,English	1307-6086		science education,teaching,instruction,evaluation	2007		2009-03-26T11:35:06Z	Special aspects of education,Education,Education,Social Sciences	Turkey	N	http://www.nef.balikesir.edu.tr/~dergi/index.php?option=com_content&task=view&id=22&Itemid=42	by-nc-nd	Yes
1690-7515Z	Enl@ce Revista Venezolana de Información Tecnología y Conocimiento		http://revistas.luz.edu.ve/index.php/enlace	Universidad del Zulia	Spanish	1690-7515		information systems,information technology	2004		2008-03-04T13:23:05Z	Bibliography. Library science. Information resources,Library and Information Science,Social Sciences	Venezuela	N	http://revistas.luz.edu.ve/normativas/normas_enlace.pdf		Yes
1224-5119Z1844-7589	Analele Universitatii din Oradea Fascicula Biologie		http://www.bioresearch.ro/revistaen.html	University of Oradea Publishing House	English	1224-5119	1844-7589	botany,biotechnology,biology,ecology,zoology	2005		2008-11-11T17:32:53Z	Biology (General),Science,Biology,Biology and Life Sciences	Romania	N	http://www.bioresearch.ro/bioresearch/author_guidelines.doc	by-nc-nd	Yes
1726-670XZ	tripleC : Communication Capitalism & Critique. Open Access Journal for a Global Sustainable Information Society		http://www.triple-c.at	tripleC	English	1726-670X		capitalism,information society,critical media studies,social studies,internet,digital media	2003		2008-11-25T11:07:33Z	Sociology (General),Social Sciences,Sociology,Social Sciences	United Kingdom	N	http://www.triple-c.at/index.php/tripleC/information/authors	by-nc-nd	Yes
1860-9171Z	GMS Medizinische Informatik Biometrie und Epidemiologie		http://www.egms.de/en/journals/mibe/index.shtml	German Medical Science, Düsseldorf	German,English	1860-9171		biostatistics,biometrics,epidemiology	2005		2008-02-04T14:14:06Z	Medicine (General),Medicine,Medicine (General),Health Sciences	Germany	N	http://www.egms.de/static/resources/journals/mibe/mibe_AuthorsGuidelines.pdf	by-nc-nd	Yes
0128-5157Z	3L Language Linguistics and Literature : the Southeast Asian Journal of English Language Studies	3L : Language, Linguistics, Literature	http://ejournals.ukm.my/3l	Penerbit UKM	English	0128-5157		language,linguistics,literature,language teaching,language research,English	2003		2010-04-16T16:30:58Z	Language and Literature,Languages and Literatures	Malaysia	N	http://ejournals.ukm.my/3l/about/submissions#onlineSubmissions		Yes
2141-2820Z2141-2839	International Journal of Engineering Science and Technology		http://www.ijest-ng.com	MultiCraft Limited	English	2141-2820	2141-2839	engineering,science,technology	2009		2010-04-19T15:34:16Z	Science (General),Science,Science (General),Science General,Technology (General),Technology,Technology (General),Technology and Engineering	Nigeria	N	http://www.ijest-ng.com/IJEST%20-%20TEMPLATE.doc		Yes
2076-9202Z2218-046X	International Journal of Information Business and Management	IJBIM	http://ijibm.site666.com/	Elite Hall Publishing House	English,Chinese	2076-9202	2218-046X	information technology,software development,business,industrial management,industrial applications	2009		2010-11-08T15:28:07Z	Management. Industrial management,Industries. Land use. Labor,Social Sciences,Business and Management,Business and Economics	Taiwan	N	http://ijibm.elitehall.com/index3.htm		Yes
2052-1847Z	BMC Sports Science Medicine and Rehabilitation		http://www.biomedcentral.com/bmcsportsscimedrehabil	BioMed Central	English	2052-1847		exercise sciences,traumatology,cardiology,physiology,nutrition	2013		2013-09-20T16:22:20Z	Sports medicine,Special situations and conditions,Internal medicine,Medicine,Sports Medicine,Medicine (General),Health Sciences	United Kingdom	Y	http://www.biomedcentral.com/bmcsportsscimedrehabil/about#apc	by	Yes
2152-372XZ	Case Studies in Business Industry and Government Statistics	CSBIGS	http://www.bentley.edu/csbigs	Bentley University	English	2152-372X		business statistics,industrial statistics,government statistics,data mining,business analytics	2008		2010-01-26T10:29:35Z	Business,Commerce,Social Sciences,Business and Management,Business and Economics	United States	N	http://www.bentley.edu/centers/csbigs/instructions-authors		Yes
1179-318XZ	Adolescent Health Medicine and Therapeutics	Adolescent Health, Medicine & Therapeutics	http://www.dovepress.com/adolescent-health-medicine-and-therapeutics-journal	Dove Medical Press	English	1179-318X		adolescents,adolescent medicine,pathology,disease treatment	2010		2010-12-21T12:51:31Z	Pediatrics,Medicine,Pediatrics,Medicine (General),Health Sciences	United Kingdom	Y	http://www.dovepress.com/author_guidelines.php?folder_id=222		Yes
1583-4026Z	Revista Română de Anatomie Funcţională şi Clinică Macro şi Microscopică şi Antropologie	Romanian Journal of Functional and Clinical, Macro- and Microscopical Anatomy and of Anthropology	http://www.revanatomie.ro	Romanian Society of Anatomy	Romanian,English	1583-4026		human anatomy,histology,physical anthropology,medical anthropology	2009		2010-08-02T14:06:41Z	Human anatomy,Science,Anatomy,Biology,Biology and Life Sciences	Romania	N	http://www.revanatomie.ro/en/authors.html		Yes
1220-2169Z	Buletinul Institutului Politehnic din Iaşi. Secţia IV Automatică şi Calculatoare	Bulletin of the Polytechnic Institute of Iasi	http://www.ace.tuiasi.ro/index.php?page=678&lang=en	Technical University Gheorghe Asachi of Iasi	English	1220-2169		automatic control,process control,computer engineering,information technology,applied informatics	2008		2010-08-30T10:35:22Z	Mechanical engineering and machinery,Technology,Mechanical Engineering,Technology and Engineering,Electronic computers. Computer science,Instruments and machines,Mathematics,Science,Computer Science,Technology and Engineering	Romania	N	http://www.tuiasi.ro/users/103/INSTRUCTIONS%20FOR%20AUTHORS.pdf		Yes
1679-6101Z2237-0900	DLCV : Língua Linguística & Literatura	DLCV : Lingua, Linguistica e Literatura	http://periodicos.ufpb.br/ojs2/index.php/dclv/index	Universidade Federal da Paraíba	Portuguese	1679-6101	2237-0900	language,literature,linguistics	2003		2011-09-02T08:21:09Z	Language and Literature,Languages and Literatures,Philology. Linguistics,Language and Literature,Linguistics,Languages and Literatures	Brazil	N	http://periodicos.ufpb.br/ojs2/index.php/dclv/about/submissions#authorGuidelines	by	Yes
1815-5928Z	Revista de Ingeniería Electrónica Automática y Comunicaciones		http://rielac.cujae.edu.cu/index.php/rieac	Instituto Superior Politécnico José Antonio Echeverría	Spanish	1815-5928		electronics,nanoelectronics,telecommunication,automatic control	2008		2011-11-24T14:15:58Z	Electrical engineering. Electronics. Nuclear engineering,Technology,Electrical and Nuclear Engineering,Technology and Engineering	Cuba	N	http://rielac.cujae.edu.cu/index.php/rieac/about/submissions#authorGuidelines		Yes
2036-5683Z2036-5462	Topologik : Rivista Internazionale di Scienze Filosofiche Pedagogiche e Sociali		http://www.topologik.net/	Luigi Pellegrini Editore	Italian,German,French,Spanish,English	2036-5683	2036-5462	philosophy,education,social studies	2006		2012-02-02T11:25:36Z	Philosophy (General),Philosophy. Psychology. Religion,Philosophy,Philosophy and Religion,Education (General),Education,Education,Social Sciences	Italy	N	http://www.topologik.net/Author_Guidelines.htm		Yes
2069-5934Z	Journal of Knowledge Management Economics and Information Technology	Journal of Knowledge Management, Economics & Information Technology	http://www.scientificpapers.org/	Scientific Papers	English	2069-5934		knowledge and information management	2010		2011-02-15T11:06:07Z	Management. Industrial management,Industries. Land use. Labor,Social Sciences,Business and Management,Business and Economics	Romania	Y	http://www.scientificpapers.org/participation-fees/		Yes
1453-9047Z2069-8291	Hermeneia : Journal of Hermeneutics Art Theory and Art Criticism	Hermeneia : Journal of Hermeneutics, Art Theory & Art Criticism	http://hermeneia.ro	Axis Academic Foundation	English,Romanian,French,German	1453-9047	2069-8291	philosophy,hermeneutics,art theory and criticism	2003		2011-06-08T09:37:52Z	Philosophy (General),Philosophy. Psychology. Religion,Philosophy,Philosophy and Religion,Arts in general,Fine Arts,Arts in general,Arts and Architecture	Romania	N	http://hermeneia.ro/?page_id=9		Yes
1843-813XZ	Annals of the University of Oradea. Fascicle of Textiles Leatherwork		http://textile.webhost.uoradea.ro/Annals/index.html	Editura Universităţii din Oradea	English	1843-813X		textile and leather,manufacturing processes,quality of processes and products,production management	2011		2011-06-15T11:45:22Z	Manufactures,Technology,Manufactures,Technology and Engineering	Romania	N	http://textile.webhost.uoradea.ro/Annals/Instructiuni%20pt%20autori.html	by-nc	Yes
1454-9832Z	Annals of the University Dunarea de Jos Galati Fascicle XV : Physical Education and Sport Management		http://www.ann.ugal.ro/efms	Galati University Press	English	1454-9832		physical education,sport management,biomechanics,kinetotherapy	2010		2011-06-16T14:48:27Z	Sports,Recreation. Leisure,Geography. Anthropology. Recreation,Sports Science,Social Sciences	Romania	N	http://www.ann.ugal.ro/efms/Documente/instructions%20for%20authors.pdf		Yes
2088-3129Z	Journal of Educational Health and Community Psychology		http://journal.uad.ac.id/index.php/Psychology/index	Universitas Ahmad Dahlan	English,Indonesian	2088-3129		psychology,health,education,community	2012		2013-04-08T18:48:24Z	Psychology,Philosophy. Psychology. Religion,Psychology,Social Sciences	Indonesia	N	http://journal.uad.ac.id/index.php/Psychology/about/submissions#authorGuidelines	by-nc	Yes
2146-5193Z	The Turkish Online Journal of Design Art and Communication		http://www.tojdac.org	Istanbul Kültür University	English,Turkish	2146-5193		social sciences,visual culture,new media,digital arts,digital society	2011		2013-05-06T17:31:36Z	General Works,Multidisciplinary,General Works	Turkey	N	http://www.tojdac.org/tojdac/SUBMISSION.html	by-nd	Yes
2299-3843Z	International Letters of Chemistry Physics and Astronomy		http://www.ilcpa.pl	Scientific Publishing House „DARWIN”	English,Polish	2299-3843		chemistry,physics,astronomy	2012		2013-05-10T11:14:42Z	Science (General),Science,Science (General),Science General	Poland	N	http://www.ilcpa.pl/instruction-for-authors/	by	Yes
1989-9572Z	Journal for Educators Teachers and Trainers	JETT	http://www.ugr.es/local/jett	Universidad de Granada	Spanish,English,Portuguese,French	1989-9572		training,pedagogy,learning	2010		2013-05-15T17:40:39Z	Theory and practice of education,Education,Education,Social Sciences	Spain	N	http://www.ugr.es/~jett/normas.php	by-nc-nd	Yes
2234-6953Z2234-8190	Animal Systematics Evolution and Diversity		http://e-ased.org/	Korean Society of Systematic Zoology	English	2234-6953	2234-8190	animal systematics,evolution,animal diversity,conservation,taxonomy	1985		2013-05-24T15:08:08Z	Zoology,Science,Zoology,Biology,Biology and Life Sciences	South Korea	CON	http://e-ased.org/on_line/forum/forum.asp?PageFn=View&n_seq=2	by-nc	Yes
2221-7258Z2221-7266	International Journal of Electrical Electronics and Computer Systems (IJEECS)		http://www.ijeecs.org/	International Journal of Electrical, Electronics and Computer Systems	English	2221-7258	2221-7266	power engineering,computer engineering,biomedical engineering,informatics	2011		2013-02-23T10:29:38Z	Science (General),Science,Science (General),Science General	Australia	Y	http://www.ijeecs.org/publication-charge		Yes
2182-438XZ	Psychology Community & Health		http://pch.psychopen.eu/index.php/pch	PsychOpen	Portuguese,English	2182-438X		psychology,community,health	2012		2013-02-26T16:18:23Z	Psychology,Philosophy. Psychology. Religion,Psychology,Social Sciences	Portugal	N	http://pch.psychopen.eu/index.php/pch/about/submissions#authorGuidelines	by	Yes
2322-4436Z2322-3219	Medical Hypothesis Discovery & Innovation Ophthalmology Journal		http://mehdijournal.com/index.php/mehdi/index	MEPTIC	English	2322-4436	2322-3219	visual sciences,minimal invasive surgeries	2012		2013-03-07T11:34:46Z	Ophthalmology,Medicine,Ophthalmology,Medicine (General),Health Sciences	Iran	CON	http://mehdijournal.com/index.php/mehdi/about/submissions#authorGuidelines	by	Yes
2145-8987Z2145-9045	Perífrasis : Revista de Literatura Teoría y Crítica		http://revistaperifrasis.uniandes.edu.co/	Universidad de los Andes, Bogotá	Spanish,English	2145-8987	2145-9045	literature,literary studies,literary theory,literary criticism,transdisciplinary literary variants	2010		2013-03-19T21:03:56Z	French literature - Italian literature - Spanish literature - Portuguese literature,Language and Literature,Languages and Literatures	Colombia	N	http://revistaperifrasis.uniandes.edu.co/index.php?option=com_content&view=article&id=47&Itemid=59		Yes
2278-179XZ	Journal of Environmental Sciences Computer Science and Engineering & Technology		http://www.jecet.org	Scientific and Academic Publication	English	2278-179X		agriculture,environmental pollution,software engineering,environmental technology	2012		2013-03-19T22:11:13Z	Engineering (General). Civil engineering (General),Technology,General and Civil Engineering,Technology and Engineering,Environmental sciences,Geography. Anthropology. Recreation,Environmental Sciences,Earth and Environmental Sciences	India	Y	http://www.jecet.org/	by-nc-nd	Yes
2284-7995Z2285-3952	Scientific Papers Series : Management Economic Engineering in Agriculture and Rural Development		http://www.managusamv.ro/reviste/publicatii#engleza	University of Agricultural Sciences and Veterinary Medicine, Bucharest	English	2284-7995	2285-3952	agrarian legislation,durable development of rural areas,environmental protection,rural tourism	2009		2012-09-19T19:25:19Z	Agriculture (General),Agriculture,Agriculture (General),Agriculture and Food Sciences	Romania	N	http://www.managusamv.ro/fisiere/file/5%20Guidelines%20for%20authors%20(1).pdf	by-nc-nd	Yes
2171-9594Z	Ecozon@ : European Journal of Literature Culture and Environment	Ecozona	http://www.ecozona.eu	EASLCE & GIECO	English,German,Spanish,French,Italian	2171-9594		ecocriticism,culture and environment,literature and environment	2010		2012-10-22T11:26:34Z	Literature (General),Language and Literature,Languages and Literatures	Spain	N	http://www.ecozona.eu/index.php/journal/about/submissions#authorGuidelines		Yes
2236-1170Z	Revista Eletrônica em Gestão Educação e Tecnologia Ambiental	REGET-CT/UFSM	http://cascavel.ufsm.br/revistas/ojs-2.2.2/index.php/reget/index	Federal University of Santa Maria (UFSM)	Portuguese,Spanish,English	2236-1170		environmental management,green technology,environmental education	2010		2012-06-13T10:50:09Z	Environmental sciences,Geography. Anthropology. Recreation,Environmental Sciences,Earth and Environmental Sciences	Brazil	N	http://cascavel.ufsm.br/revistas/ojs-2.2.2/index.php/reget/about/submissions#authorGuidelines		Yes
1026-2881Z1683-5018	Pachyderm : Journal of the African Elephant African Rhino and Asian Rhino Specialist Groups		http://www.pachydermjournal.org	International Union for Conservation of Nature (IUCN)	English,French	1026-2881	1683-5018	rhinoceros,African elephant,wildlife conservation,wildlife management	2007		2012-06-25T12:41:04Z	Zoology,Science,Zoology,Biology,Biology and Life Sciences	Kenya	N	http://www.pachydermjournal.org/index.php/pachy/about/submissions#authorGuidelines		Yes
1580-5573Z1581-6974	AR : Arhitektura Raziskave	AR : Architecture, Research	http://www.fa.uni-lj.si/default.asp?id=2577	University of Ljubljana	Slovene,English	1580-5573	1581-6974	architecture,cultural heritage,history of architecture,vernacular architecture,urban design	2001		2012-07-05T14:23:52Z	Architecture,Fine Arts,Architecture,Arts and Architecture	Slovenia	N	http://www.fa.uni-lj.si/filelib/9_ar/datoteke/ar_navodila_guides.pdf	by-nc-nd	Yes
2305-0543Z	International Journal of Mechatronics Electrical and Computer Technology		http://www.aeuso.org	Austrian E-Journals of Universal Scientific Organization	English	2305-0543		mechatronics,robotics,microcontrollers,wireless network	2011		2013-06-01T16:20:32Z	Electronic computers. Computer science,Instruments and machines,Mathematics,Science,Computer Science,Technology and Engineering	Austria	N	http://www.aeuso.org/Submit%20Manuscript.html	by-nc-nd	Yes
1584-2339Z2285-3065	Studia Universitatis Vasile Goldis Arad Seria Stiinte Economice	Studia Universitatis Vasile Goldiş Arad. Economic Sciences	http://www.uvvg.ro/studiaeconomia/index.php?option=com_content&view=frontpage&Itemid=1	Vasile Goldis University Press	English,Romanian	1584-2339	2285-3065	economics,business,management	2007		2012-08-20T09:43:36Z	Economic theory. Demography,Social Sciences,Economics,Business and Economics	Romania	N	http://www.uvvg.ro/studiaeconomia/index.php?option=com_content&view=article&id=30&Itemid=37	by-nc-sa	Yes
1607-8322Z2220-5799	Anaesthesia Pain & Intensive Care		http://www.apicareonline.com	Anaesthesia, Pain & Intensive Care	English	1607-8322	2220-5799	anaesthesia,pain,intensive care,resuscitation	2010		2013-01-17T10:23:14Z	Anesthesiology,Surgery,Medicine,Anesthesiology,Medicine (General),Health Sciences	Pakistan	N	http://www.apicareonline.com/?page_id=72		Yes
2316-932XZ	Podium : Sport Leisure and Tourism Review		http://www.podiumreview.org.br	Universidade Nove de Julho - UNINOVE	Portuguese,English,Spanish	2316-932X		tourism sports,history of sports,event management	2012		2013-01-22T10:38:38Z	Sports,Recreation. Leisure,Geography. Anthropology. Recreation,Sports Science,Social Sciences	Brazil	N	http://www.podiumreview.org.br/	by-nc	Yes
2316-5251Z1807-8214	Revista Ártemis : Estudos de Gênero Feminismo e Sexualidades		http://periodicos.ufpb.br/ojs2/index.php/artemis	Universidade Federal da Paraíba	Portuguese,Spanish,English	2316-5251	1807-8214	gender studies,sexualities,women´s studies	2004		2013-10-28T17:43:32Z	Women. Feminism,The family. Marriage. Woman,Social Sciences,Gender Studies,Social Sciences	Brazil	N	http://periodicos.ufpb.br/ojs2/index.php/artemis/about/submissions#authorGuidelines		Yes
1857-8152Z	Research in Physical Education Sport and Health		http://www.pesh.mk	Faculty of Physical Culture, Skopje	English	1857-8152		kinesiology,psychology,public health,sociology,pedagogy	2012		2013-06-30T17:49:05Z	Sports,Recreation. Leisure,Geography. Anthropology. Recreation,Sports Science,Social Sciences	Macedonia	CON	http://www.pesh.mk/obrasci_EN.php	by-nc-nd	Yes
2035-8466Z	Aisthesis : Pratiche Linguaggi e Saperi dell’Estetico		http://www.fupress.net/index.php/aisthesis	Firenze University Press	Italian,English	2035-8466		contemporary arts,perception,language,philosophy	2008		2013-07-05T14:14:51Z	Aesthetics,Philosophy. Psychology. Religion,Philosophy,Philosophy and Religion	Italy	N	http://www.fupress.net/index.php/aisthesis/about/submissions#onlineSubmissions		Yes
2193-0856Z2193-0864	Geoscientific Instrumentation Methods and Data Systems		http://www.geoscientific-instrumentation-methods-and-data-systems.net	Copernicus Publications	English	2193-0856	2193-0864	atmospheric science,geospace science,earth science,ocean science	2012		2013-07-31T11:03:17Z	Geology,Science,Earth Sciences,Earth and Environmental Sciences	Germany	Y	http://www.geoscientific-instrumentation-methods-and-data-systems.net/submission/service_charges.html	by	Yes
2322-5572Z	Applied Mathematics in Engineering Management and Technology		http://www.amiemt.riiz.ir	E.M.T	English	2322-5572		applied mathematics,algorithms,decision making,economics,management	2013		2013-07-09T20:49:20Z	Mathematics,Science,Mathematics,Mathematics and Statistics	Iran	Y		by-nd	Yes
1532-0642Z	The Internet Journal of Asthma Allergy and Immunology		http://www.ispub.com/journal/the-internet-journal-of-asthma-allergy-and-immunology/	Internet Scientific Publications, LLC	English	1532-0642		asthma,allergy,immunology	1999		2003-04-08T11:42:05Z	Diseases of the respiratory system,Specialties of internal medicine,Internal medicine,Medicine,Internal medicine,Medicine (General),Health Sciences,Immunologic diseases. Allergy,Specialties of internal medicine,Internal medicine,Medicine,Allergy and Immunology,Medicine (General),Health Sciences	United States	Y	http://www.quickmedpub.com/		Yes
1137-5019Z	Cybermetrics : International Journal of Scientometrics Informetrics and Bibliometrics		http://cybermetrics.cindoc.csic.es/	Centro de Informacion y Documentacion Cientifica	English	1137-5019		library and information science,scientrometrics,bibliometrics,informetrics,Internet	1997		2003-11-20T00:00:00Z	Bibliography. Library science. Information resources,Library and Information Science,Social Sciences	Spain	N	http://cybermetrics.cindoc.csic.es/authors.html		Yes
1092-1206Z	Issues in Science and Technology Librarianship : a quarterly publication of the Science and Technology Section Association of College and Research Libraries	ISTL	http://www.istl.org/	Association of College and Research Libraries	English	1092-1206		library and information science	1991		2003-06-06T00:00:00Z	Bibliography. Library science. Information resources,Library and Information Science,Social Sciences	United States	N	http://www.istl.org/authors.html		Yes
0332-7353Z1890-1328	Modeling Identification and Control	MIC	http://www.mic-journal.no/	Norwegian Society of Automatic Control	English	0332-7353	1890-1328	mathematic modeling,mathematical analyses,system identification,control theory,computer applications	1980		2010-03-03T11:58:40Z	Mathematics,Science,Mathematics,Mathematics and Statistics,Electronic computers. Computer science,Instruments and machines,Mathematics,Science,Computer Science,Technology and Engineering	Norway	Y	http://www.mic-journal.no/micauthors.asp	by	Yes
1574-0617Z	Journal on Satisfiability Boolean Modeling and Computation	JSAT	http://jsat.ewi.tudelft.nl/	Delft University	English	1574-0617		satisfiability,Boolean reasoning,Boolean computing,Boolean modeling,logic	2005		2006-05-18T17:40:47Z	Electronic computers. Computer science,Instruments and machines,Mathematics,Science,Computer Science,Technology and Engineering,Mathematics,Science,Mathematics,Mathematics and Statistics	Netherlands	N	http://jsat.ewi.tudelft.nl/		Yes
1552-5112Z	Kritikos. Journal of postmodern cultural sound text and image		http://intertheory.org/kritikos	Intertheory Press	English	1552-5112		critical theory,cultural studies,art theory,art criticism	2004		2006-06-07T09:56:03Z	Arts in general,Fine Arts,Arts in general,Arts and Architecture	United States	N	http://intertheory.org/Submissions--Kritikos.htm		Yes
0869-6365Z	Novoe Literaturnoe Obozrenie : Teorija i Istorija Literatury Kritika i Bibliografija	NLO	http://magazines.russ.ru/nlo/	Novoe literaturnoe obozrenie	Russian	0869-6365		literary criticism,history,cultural studies	1996		2006-06-27T14:16:10Z	Literature (General),Language and Literature,Languages and Literatures	Russia	NY			Yes
1548-7733Z	Sustainability : Science Practice and Policy		http://sspp.proquest.com	CSA, NBII	English	1548-7733		sustainable solutions,nature-society interactions,biological/environmental interaction	2005		2005-04-25T10:47:20Z	Environmental technology. Sanitary engineering,Technology,Environmental Technology,Technology and Engineering,Economic theory. Demography,Social Sciences,Economics,Business and Economics	United States	Y	http://sspp.proquest.com/about/authors.html		Yes
1815-0659Z	Symmetry Integrability and Geometry : Methods and Applications		http://www.emis.de/journals/SIGMA/	National Academy of Science of Ukraine	English	1815-0659		mathematical physics,differential geometry,integrable systems,Lie groups and algebras,representation theory,special functions,symmetry,supersymmetry	2005		2005-12-08T16:23:34Z	Mathematics,Science,Mathematics,Mathematics and Statistics	Ukraine	N	http://www.emis.de/journals/SIGMA/about.html	by-nc-sa	Yes
1826-0128Z	VEGA : Periodico Elettronico di Cultura Didattica e Formazione		http://www.vegajournal.org	Università degli Studi di Perugia	Italian	1826-0128		educational sciences,learning,teaching,lifelong learning	2005		2005-12-19T11:49:37Z	Education (General),Education,Education,Social Sciences	Italy	N	http://www.vegajournal.org/content/collabora-con-vega		Yes
1608-1587Z1680-9440	Journal für Neurologie Neurochirurgie und Psychiatrie		http://www.kup.at/journals/neurologie/index.html	Krause & Pachernegg GmbH	German	1608-1587	1680-9440	neurology,neurosurgery,psychiatry	2001		2005-06-26T16:12:57Z	Neurology. Diseases of the nervous system,Neurosciences. Biological psychiatry. Neuropsychiatry,Internal medicine,Medicine,Neurology,Medicine (General),Health Sciences,Psychiatry,Neurology. Diseases of the nervous system,Neurosciences. Biological psychiatry. Neuropsychiatry,Internal medicine,Medicine,Psychiatry,Medicine (General),Health Sciences	Austria	N	http://www.kup.at/journals/neurologie/richtlinien.html		Yes
2081-237XZ	Pediatric Endocrinology Diabetes and Metabolism	Endokrynologia, Diabetologia i Choroby Przemiany Materii Wieku Rozwojowego	http://cornetis.pl/czasopismo/2.html	Cornetis sp. z o.o.	Polish,English	2081-237X		children,endocrinology,diabetes,metabolism	1998		2007-07-25T13:25:07Z	Pediatrics,Medicine,Pediatrics,Medicine (General),Health Sciences	Poland	N	http://cornetis.pl/files/ED_regulamin_en.pdf		Yes
1933-5377Z	Journal of Social Evolutionary and Cultural Psychology	JSEC	http://137.140.1.71/jsec/	Journal of Social, Evolutionary and Cultural Psychology	English	1933-5377		human behaviour,emotion,cognition,motivation	2007		2008-03-17T14:42:36Z	Psychology,Philosophy. Psychology. Religion,Psychology,Social Sciences	United States	N	http://shell.newpaltz.edu/jsec/?page_id=5		Yes
1944-8171Z	International Journal of Physiology Pathophysiology and Pharmacology	IJPPP	http://www.ijppp.org/index.html	e-Century Publishing Corporation	English	1944-8171		human physiology,pathophysiology,experimental pharmacology,clinical pharmacology	2009		2009-01-30T13:28:04Z	Physiology,Science,Physiology,Biology,Biology and Life Sciences	United States	Y	http://www.ijppp.org/guidelines.html		Yes
0717-1285Z0718-5758	Onomázein : Revista de Lingüística Filología y Traducción		http://www.onomazein.net	Facultad de Letras - Pontificia Universidad Católica de Chile	Spanish,English,French	0717-1285	0718-5758	linguistics,philology,translation studies	1996		2009-04-02T14:48:49Z	Philology. Linguistics,Language and Literature,Linguistics,Languages and Literatures	Chile	N	http://www.onomazein.net/normas.html	by-nd	Yes
1885-4486Z	Revista Española de Innovación Calidad e Ingeniería del Software	REICIS	http://www.redalyc.org/revista.oa?id=922	Asociación de Técnicos de Informática	Spanish	1885-4486		innovations,software engineering	2005		2008-07-31T16:18:21Z	Electronic computers. Computer science,Instruments and machines,Mathematics,Science,Computer Science,Technology and Engineering	Spain	N	http://redalyc.org/redalyc/media/normas/normcol922.html		Yes
0122-5383Z	CT&F - Ciencia Tecnología y Futuro		http://www.scielo.org.co/scielo.php?script=sci_serial&pid=0122-5383&lng=en&nrm=iso	Instituto Colombiano del Petróleo (ICP) - ECOPETROL S.A.	English,Spanish	0122-5383		petroleum,natural gas,alternative energy sources	1996		2008-06-17T14:19:13Z	Chemical technology,Technology,Chemical Technology,Technology and Engineering	Colombia	N	http://www.scielo.org.co/revistas/ctyf/iinstruc.htm		Yes
0974-2700Z0974-519X	Journal of Emergencies Trauma and Shock		http://www.onlinejets.org/	Medknow Publications	English	0974-2700	0974-519X	emergency medicine,traumatolgy,shock resuscitation	2008		2008-07-29T12:03:14Z	Medical emergencies. Critical care. Intensive care. First aid,Internal medicine,Medicine,Internal medicine,Medicine (General),Health Sciences	India	N	http://www.onlinejets.org/contributors.asp	by-nc-sa	Yes
2005-4254Z	International Journal of Signal Processing Image Processing and Pattern Recognition	International Journal of Signal Processing, Image Processing & Pattern Recognition	http://www.sersc.org/journals/IJSIP/	SERSC	English	2005-4254		3D and stereo imaging,computer vision,remote sensing,text processing	2008		2010-12-27T14:45:23Z	Electronic computers. Computer science,Instruments and machines,Mathematics,Science,Computer Science,Technology and Engineering	South Korea	CON	http://www.sersc.org/journals/IJSIP/		Yes
2108-6907Z	Criminocorpus Revue Hypermédia		http://criminocorpus.revues.org/	Criminocorpus	French,English	2108-6907		criminology,criminal justice,law,legal history	2005		2011-01-13T15:47:34Z	Social pathology. Social and public welfare. Criminology,Social Sciences,Social and Public Welfare,Sociology,Social Sciences	France	N	http://criminocorpus.revues.org/93		Yes
2093-9655Z	International Journal of Energy Information and Communications		http://www.sersc.org/journals/IJEIC/	SERSC	English	2093-9655		energy systems,intelligent and knowledge-based systems,communication networks	2010		2011-01-26T15:06:13Z	Physics,Science,Physics (General),Physics and Astronomy	South Korea	CON	http://www.sersc.org/journals/IJEIC/		Yes
2190-3387Z	JIPITEC : Journal of Intellectual Property Information Technology and E-Commerce Law	Journal of Intellectual Property, Information Technology & E-Commerce Law	http://www.jipitec.eu/	Digital Peer Publishing	English	2190-3387		intellectual property,electronic commerce law,European law	2010		2010-11-30T12:43:26Z	Law of Europe,Law,Law,Law and Political Science	Germany	N	http://www.jipitec.eu/for-authors		Yes
2067-3655Z	Meta : Research in Hermeneutics Phenomenology and Practical Philosophy	Meta : Research in Hermeneutics, Phenomenology & Practical Philosophy	http://www.metajournal.org/	Alexandru Ioan Cuza University of Iasi	English,French,German,Spanish,Italian	2067-3655		hermeneutics,phenomenology,practical philosophy,history of philosophy	2009		2010-12-09T07:29:05Z	Philosophy (General),Philosophy. Psychology. Religion,Philosophy,Philosophy and Religion	Romania	N	http://www.metajournal.org/display_page.php?title=submission_guidelines		Yes
1579-1726Z1988-2041	Retos : Nuevas Perspectivas de Educación Física Deporte y Recreación		http://www.retos.org	Federación Española de Docentes de Educación Física	Spanish	1579-1726	1988-2041	psychology,physical education,exercise,health	2007		2010-08-02T16:15:40Z	Sports,Recreation. Leisure,Geography. Anthropology. Recreation,Sports Science,Social Sciences	Spain	N	http://www.retos.org/normas_publica.html		Yes
1514-8327Z1851-1740	Información Cultura y Sociedad		http://www.scielo.org.ar/scielo.php/script_sci_serial/pid_1851-1740/lng_es/nrm_iso	Universidad de Buenos Aires	Spanish,Portuguese	1514-8327	1851-1740	production of information,preservation of information,circulation of information,dissemination of information	2002		2010-08-03T10:54:05Z	Bibliography. Library science. Information resources,Library and Information Science,Social Sciences	Argentina	N	http://www.scielo.org.ar/revistas/ics/einstruc.htm		Yes
0976-2205Z0976-1764	International Journal of Ad Hoc Sensor & Ubiquitous Computing	IJASUC	http://airccse.org/journal/ijasuc/ijasuc.html	Academy & Industry Research Collaboration Center (AIRCC)	English	0976-2205	0976-1764	ad hoc computing,ad hoc networks,wireless sensor networks,network design,ubiquitous computing	2010		2010-08-25T09:38:09Z	Electronic computers. Computer science,Instruments and machines,Mathematics,Science,Computer Science,Technology and Engineering	India	Y	http://airccse.org/journal/ijasuc/papersub.html	by	Yes
2005-4246Z	International Journal of u- and e- Service Science and Technology		http://www.sersc.org/journals/IJUNESST/	SERSC	English	2005-4246		web services,open source,grid computing	2008		2010-09-02T14:26:30Z	Electronic computers. Computer science,Instruments and machines,Mathematics,Science,Computer Science,Technology and Engineering	South Korea	CON	http://www.sersc.org/journals/IJUNESST/		Yes
0126-5644Z2180-0251	Jebat : Malaysian Journal of History Politics and Strategic Studies		http://pkukmweb.ukm.my/jebat/v2/	Universiti Kebangsaan Malaysia	Malay,Bahasa Indonesia,English	0126-5644	2180-0251	politics,international relations,intercultural relations	2007		2010-04-14T08:46:06Z	History (General),History (General) and history of Europe,History,History and Archaeology	Malaysia	N	http://pkukmweb.ukm.my/jebat/v2/?cont=d&item=5		Yes
1314-0426Z1314-0256	Venets : The Belogradchik Journal for Local History Cultural Heritage and Folk Studies	Venec	http://www.venets.org	SCS Consulting Ltd.	Bulgarian	1314-0426	1314-0256	local history,heritage studies,rural studies,folk studies,Belogradchik region	2010		2010-04-14T10:23:41Z	Folklore,Geography. Anthropology. Recreation,Anthropology,Social Sciences	Bulgaria	N	http://www.venets.org/index.php?page=14	by-nc-nd	Yes
1413-7321Z2236-6377	Revista de Educação Ciência e Cultura	La Salle	http://www.revistas.unilasalle.edu.br/index.php/Educacao	Centro Universitário La Salle	Portuguese	1413-7321	2236-6377	education	2007		2012-02-28T14:42:41Z	Education (General),Education,Education,Social Sciences	Brazil	N	http://www.revistas.unilasalle.edu.br/index.php/Educacao/about/submissions#authorGuidelines	by-nc	Yes
1918-9354Z	Revue Multidisciplinaire sur l'Emploi le Syndicalisme et le Travail		http://www.remest.ca/	Université du Québec en Outaouais	French	1918-9354		employment,labor economics,labor unions,industrial relations	2005		2012-03-22T13:28:42Z	Industries. Land use. Labor,Social Sciences,Social Sciences	Canada	N	http://www.remest.ca/pages/SoumTxt.php		Yes
2088-5334Z	International Journal on Advanced Science Engineering and Information Technology	IJASEIT	http://ijaseit.insightsociety.org/	Indonesian Society for Knowledge and Human Development (INSIGHT)	English	2088-5334		applied science,engineering,computer science,information technology	2011		2012-03-30T10:10:26Z	Science (General),Science,Science (General),Science General	Indonesia	Y	http://ijaseit.insightsociety.org/index.php?option=com_content&view=article&id=11&Itemid=8		Yes
2231-0088Z2230-9616	International Journal of Computer Science Engineering and Applications (IJCSEA)		http://airccse.org/journal/ijcsea/index.html	AIRCC	English	2231-0088	2230-9616	data mining,intelligent information,networking and communications,computer education	2011		2011-11-17T16:54:23Z	Electronic computers. Computer science,Instruments and machines,Mathematics,Science,Computer Science,Technology and Engineering	Australia	N	http://airccse.org/journal/ijcsea/submission.html	by-nc	Yes
2179-1074Z	Journal of Microwaves Optoelectronics and Electromagnetic Applications		http://www.jmoe.org/site-home	Brazilian Microwave and Optoelectronics Society and Brazilian Society of Electromagnetism	English	2179-1074		photonics,antennas,propagation,electromagnetic applications	2008		2011-12-28T19:32:11Z	Electrical engineering. Electronics. Nuclear engineering,Technology,Electrical and Nuclear Engineering,Technology and Engineering	Brazil	N	http://www.jmoe.org/site-information_authors	by-nc	Yes
0137-0936Z	Vestnik Moskovskogo Universiteta. Seriâ 14 Psihologiâ	Moscow University Herald. Series 14. Psychology	http://www.psy.msu.ru/science/vestnik/index.html	M.V. Lomonosov Moscow State University	Russian	0137-0936		psychology in Russia,cultural-historical psychology,activity theory	2007		2012-01-12T13:12:13Z	Psychology,Philosophy. Psychology. Religion,Psychology,Social Sciences	Russia	N	http://www.psy.msu.ru/science/vestnik/requirements.html		Yes
1179-9927Z	Pediatric Health Medicine and Therapeutics	Pediatric Health, Medicine & Therapeutics	http://www.dovepress.com/pediatric-health-medicine-and-therapeutics-journal	Dove Medical Press	English	1179-9927		pediatrics	2010		2011-06-13T12:23:13Z	Pediatrics,Medicine,Pediatrics,Medicine (General),Health Sciences	New Zealand	Y	http://www.dovepress.com/journal_pricing_bands.php?journal_id=103		Yes
1735-1502Z1735-5249	Iranian Journal Of Allergy Asthma and Immunology		http://ijaai.tums.ac.ir	Tehran University of Medical Sciences	English	1735-1502	1735-5249	immunologic diseases	2000		2011-10-04T16:33:37Z	Immunologic diseases. Allergy,Specialties of internal medicine,Internal medicine,Medicine,Allergy and Immunology,Medicine (General),Health Sciences	Iran	CON	http://journals.tums.ac.ir/instruction.aspx?org_id=59&culture_var=en&journal_id=15&segment=en&issue_id=2323	by-nc	Yes
2074-9074Z2074-9082	International Journal of Image Graphics and Signal Processing	IJIGSP	http://www.mecs-press.org/ijigsp/	MECS Publisher	English	2074-9074	2074-9082	computer graphics,image processing,signal processing	2009		2011-10-13T12:34:30Z	Electronic computers. Computer science,Instruments and machines,Mathematics,Science,Computer Science,Technology and Engineering	Hong Kong	N	http://www.mecs-press.org/ijigsp/author.html		Yes
2177-6644Z	Revista Tempo Espaço e Linguagem	Revista TEL	http://www.unicentro.br/revistatel	Universidade Estadual do Centro Oeste	Portuguese	2177-6644		Brazilian history	2010		2011-10-21T12:52:46Z	Latin America. Spanish America,History America,History,History and Archaeology	Brazil	N	http://www.revistas2.uepg.br/index.php/tel/about/submissions#authorGuidelines		Yes
2069-4008Z2069-4016	Annals of Philosophy Social and Human Disciplines		http://www.fig.usv.ro/socio-umane/index.html	Universitatea "Stefan cel Mare" Suceava	English	2069-4008	2069-4016	social sciences,humanities,literature	2001		2013-05-20T17:59:51Z	General Works,Multidisciplinary,General Works	Romania	N	http://www.fig.usv.ro/socio-umane/cfp.html		Yes
0718-378XZ	Revista AIDIS de Ingeniería y Ciencias Ambientales		http://www.revistas.unam.mx/index.php/aidis/index	Universidad Nacional Autónoma de México	Spanish,English,Portuguese	0718-378X		energy,environmental health,new technologies,law and environmental policy,environmental management	2006		2013-05-24T15:32:15Z	Environmental technology. Sanitary engineering,Technology,Environmental Technology,Technology and Engineering	Mexico	N	http://www.revistas.unam.mx/index.php/aidis/about/submissions#authorGuidelines	by-nc	Yes
1300-7718Z	The Turkish Nephrology Dialysis and Transplantation Journal		http://www.tndt.org	Turkish Society of Nephrology	Turkish,English	1300-7718		hypertension,pediatricnephrology	1992		2013-06-04T15:56:52Z	Diseases of the genitourinary system. Urology,Specialties of internal medicine,Internal medicine,Medicine,Urology,Medicine (General),Health Sciences	Turkey	N	http://www.tndt.org/instructions.php3?id=78		Yes
0873-6529Z	Sociologia Problemas e Práticas		http://www.scielo.gpeari.mctes.pt/scielo.php?script=sci_serial&pid=0873-6529&lng=pt&nrm=iso	Editora Mundos Sociais	Portuguese,English,Spanish,French	0873-6529		sociology,interdisciplinary studies	2000		2012-05-31T07:36:41Z	Sociology (General),Social Sciences,Sociology,Social Sciences	Portugal	N	http://www.scielo.gpeari.mctes.pt/revistas/spp/pinstruc.htm		Yes
1582-2168Z	Sport si Societate : Revista de Educatie Fizica Sport si Stiinte Conexe	Sport and Society : Interdisciplinary Journal of Physical Education and Sport	http://www.sportsisocietate.ro/	Alexandru Ioan Cuza University of Iasi	Romanian,English	1582-2168		physical education	2011		2012-06-14T18:09:34Z	Sports,Recreation. Leisure,Geography. Anthropology. Recreation,Sports Science,Social Sciences	Romania	CON	http://www.sportsisocietate.ro/en/requests		Yes
2231-8194Z	International e-Journal of Science Medicine & Education	International e-Journal of Science, Medicine and Education	http://www.imu.edu.my/ejournal/	International Medical University, Malaysia	English	2231-8194		medicine,dentistry,pharmacy,nursing,education	2007		2012-06-25T12:56:20Z	Science (General),Science,Science (General),Science General	Malaysia	N	http://web.imu.edu.my/ejournal/authors.asp		Yes
2220-4229Z2220-878X	Algoritmy Metody i Sistemy Obrabotki Dannyh	Algorithms, Methods and Data Processing Systems	http://amisod.ru	Vladimir State University	Russian	2220-4229	2220-878X	information technology,algorithms,simulation,data processing	2011		2012-07-09T08:58:22Z	Information technology,Industrial engineering. Management engineering,Technology (General),Technology,Computer Science,Technology and Engineering	Russia	N	http://amisod.ru/index.php?option=com_content&view=article&id=5&Itemid=106	by	Yes
2014-9255Z	FairPlay : Revista de Filosofia Ética y Derecho del Deporte		http://www.raco.cat/index.php/FairPlay	Universitat Pompeu Fabra	Catalan,English	2014-9255		ethics,philosophy,law	2013		2013-05-10T17:01:58Z	Sports,Recreation. Leisure,Geography. Anthropology. Recreation,Sports Science,Social Sciences	Spain	N	http://www.raco.cat/index.php/FairPlay/about/submissions#authorGuidelines		Yes
1612-412XZ	Zitteliana Series A	Zitteliana A	http://www.palmuc.de/bspg/index.php?option=com_content&view=article&id=79&Itemid=59	Bavarian State Collection for Palaeontology and Geology	English,German	1612-412X		geobiology,palaeontology	2003		2012-08-24T13:22:24Z	Geology,Science,Earth Sciences,Earth and Environmental Sciences	Germany	N	http://www.palmuc.de/bspg/index.php?option=com_content&view=article&id=191&Itemid=296		Yes
2238-5320Z	Revista de Gestão Finanças e Contabilidade		http://www.revistas.uneb.br/index.php/financ/issue/current	Universidade do Estado da Bahia	Portuguese	2238-5320		business administration,finance,accounting	2011		2013-02-26T16:09:58Z	Business,Commerce,Social Sciences,Business and Management,Business and Economics	Brazil	N	http://www.revistas.uneb.br/index.php/financ/about/submissions#onlineSubmissions	by-nc	Yes
2161-6590Z	Health Culture and Society		http://hcs.pitt.edu	University of Pittsburgh	English	2161-6590		alternative medicine,access to health care,health equity,health policy	2011		2013-03-07T19:49:57Z	Public aspects of medicine,Medicine,Public Health,Health Sciences	United States	N	http://hcs.pitt.edu/ojs/index.php/hcs/about/submissions#authorGuidelines	by	Yes
1697-7750Z	Culture Language and Representation		http://www.e-revistes.uji.es/index.php/clr	Universitat Jaume I	Spanish,English	1697-7750		sociology,education,history,politics,art	2008		2013-03-11T22:05:02Z	Ethnology. Social and cultural anthropology,Anthropology,Geography. Anthropology. Recreation,Ethnology,Social Sciences	Spain	N	http://www.e-revistes.uji.es/index.php/clr/about/submissions#authorGuidelines		Yes
1982-7342Z	Revista Sociedade Contabilidade e Gestão		http://www.revistascg.facc.ufrj.br	Universidade Federal do Rio de Janeiro (UFRJ)	Portuguese,Spanish,	1982-7342		accounting,management,social reporting,environmental accounting,finance	2006		2013-03-22T16:06:24Z	Business,Commerce,Social Sciences,Business and Management,Business and Economics	Brazil	N	http://www.atena.org.br/revista/ojs-2.2.3-06/index.php/ufrj/about/submissions#authorGuidelines		Yes
2277-663XZ2278-3687	International Journal of Science Environment and Technology		http://www.ijset.net	Scientific Research Forum	English	2277-663X	2278-3687	technology,agriculture,environment,engineering,biology	2012		2013-03-28T14:17:51Z	General Works,Multidisciplinary,General Works	India	Y	http://ijset.net/authors.asp		Yes
2084-1264Z	Wroclaw Review of Law Administration and Economics		http://wrlae.prawo.uni.wroc.pl/index.php/wrlae	University of Wroclaw	English	2084-1264		legal cultures,administrative systems,New Europe	2011		2012-12-18T20:23:23Z	Law of Europe,Law,Law,Law and Political Science	Poland	N	http://wrlae.prawo.uni.wroc.pl/index.php/wrlae/about/submissions#authorGuidelines		Yes
0350-7599Z1821-2808	Journal of the Geographical Institute Jovan Cvijic SASA		http://www.doiserbia.nb.rs/journal.aspx?issn=0350-7599	Geographical Institute “Jovan Cvijić” SASA	Serbian,English	0350-7599	1821-2808	demography,regional development,tourism	2002		2012-12-21T17:45:30Z	Geography (General),Geography. Anthropology. Recreation,Geography,Earth and Environmental Sciences	Serbia	N	http://www.doiserbia.nb.rs/journal.aspx?issn=0350-7599		Yes
2237-0722Z	Revista GEINTEC : Gestão Inovação e Tecnologias		http://www.revistageintec.net/	Universidade Federal de Sergipe	Portuguese,English	2237-0722		technological forecasting. intellectual property,technology transfer	2011		2013-01-10T15:44:48Z	Technology (General),Technology,Technology (General),Technology and Engineering	Brazil	N	http://www.revistageintec.net/portal/index.php/revista/about/submissions#authorGuidelines	by-nc	Yes
2192-0567Z	Energy Sustainability and Society		http://energsustainsoc.com/	Springer	English	2192-0567		energy innovation,sustainable energy systems	2011		2013-01-15T18:31:48Z	Environmental sciences,Geography. Anthropology. Recreation,Environmental Sciences,Earth and Environmental Sciences	Germany	Y	http://www.energsustainsoc.com/about#apc		Yes
2240-4554Z	MLTJ : Muscles Ligaments and Tendons Journal		http://www.mltj.org/	CIC Edizioni Internazionali	English	2240-4554		ligaments,muscular diseases,myositis,tendons	2011		2013-01-31T09:59:29Z	Sports medicine,Special situations and conditions,Internal medicine,Medicine,Sports Medicine,Medicine (General),Health Sciences	Italy	N	http://www.mltj.org/index.php?PAGE=ewpage&PAGE_TYPE=AUTH		Yes
1929-8692Z	Decolonization : Indigeneity Education & Society		http://decolonization.org/index.php/des	Journal Publishing Services	English	1929-8692		decolonization,indigenous knowledges,education,indigeneity,sociology	2012		2013-06-09T19:37:41Z	Colonies and colonization. Emigration and immigration. International migration,Political science,Migration,Social Sciences	Canada	N	http://decolonization.org/index.php/des/about/submissions#authorGuidelines	by-nc	Yes
2152-2804Z	Journal of Education Policy Planning and Administration		http://www.jeppa.org	JEPPA	English	2152-2804		educational administration,educational leadership,educational policy	2011		2012-11-28T19:15:47Z	Education (General),Education,Education,Social Sciences	United States	N	http://www.jeppa.org/?page_id=19		Yes
2299-7075Z2299-7326	Journal of Entrepreneurship Management and Innovation	JEMI	http://www.jemi.edu.pl	Nowy Sacz Business School National-Louis University	English	2299-7075	2299-7326	entrepreneurship,management,innovation	2009		2012-11-29T15:57:00Z	Business,Commerce,Social Sciences,Business and Management,Business and Economics	Poland	N	http://jemi.edu.pl/pl/submission.html		Yes
2074-9481Z	Pravove Normativne ta Metrologìčne Zabezpečennâ Sistemi Zahistu Informacìï v Ukraïnì		http://pnzzi.kpi.ua	National Technical University of Ukraine	Russian,Ukrainian	2074-9481		technical protection,computer security,cryptography,metrology	2001		2013-09-16T10:44:56Z	Information technology,Industrial engineering. Management engineering,Technology (General),Technology,Computer Science,Technology and Engineering	Ukraine	N	http://pnzzi.kpi.ua/pnzzi02.htm		Yes
2281-3209Z	EPEKEINA : International Journal of Ontology History and Critics		http://www.ricercafilosofica.it/epekeina	CRF - Centro Internazionale per la Ricerca Filosofica	English,Italian,French,German	2281-3209		ontology,epistemology,metaphysics,history of philosophy,philosophy of science,cognitive sciences	2012		2013-10-02T14:22:18Z	Philosophy (General),Philosophy. Psychology. Religion,Philosophy,Philosophy and Religion	Italy	N	http://www.ricercafilosofica.it/epekeina/index.php/epekeina/about/submissions#authorGuidelines	by-nc-nd	Yes
2193-0872Z	Geoscientific Instrumentation Methods and Data Systems Discussions		http://www.geoscientific-instrumentation-methods-and-data-systems.net	Copernicus Publications	English	2193-0872		atmospheric science,geospace science,earth science,ocean science	2011		2013-07-31T10:51:31Z	Geology,Science,Earth Sciences,Earth and Environmental Sciences	Germany	Y	http://www.geoscientific-instrumentation-methods-and-data-systems.net/submission/service_charges.html	by	Yes
2329-2210Z	International Journal of Society Culture and Language		http://www.ijscl.net	Lulu Press Inc.	English	2329-2210		anthropology,sociology,linguistics,education,intercultural studies	2013		2013-07-05T13:59:01Z	General Works,Multidisciplinary,General Works	United States	N	http://www.ijscl.net/journal/authors.note		Yes
2321-5143Z	International Journal of Engineering Mathematics and Computer Sciences		http://www.thetic.in	Thetic Journals	English	2321-5143		applied mathematics	2013		2013-07-08T14:35:29Z	General Works,Multidisciplinary,General Works	India	Y	http://thetic.in/index.php/ijemcs/about/submissions#onlineSubmissions		Yes
2320-2084Z2321-2950	International Journal of Electrical Electronics and Data Communication		http://iraj.in/journal/IJEEDC/index.php	Institute Of Research And Journals	English	2320-2084	2321-2950	electrical engineering,electronics engineering,financial engineering,industrial engineering,networking	2013		2013-07-08T15:01:54Z	General Works,Multidisciplinary,General Works	India	N	http://iraj.in/journal/IJEEDC/aut_gyd.php	by-nc-nd	Yes
1528-8277Z	The Internet Journal of Pain Symptom Control and Palliative Care		http://www.ispub.com/journal/the-internet-journal-of-pain-symptom-control-and-palliative-care/	Internet Scientific Publications, LLC	English	1528-8277		palliative,nursing,hospice,pain	2000		2003-04-08T11:42:05Z	Medicine (General),Medicine,Medicine (General),Health Sciences	United States	Y	http://www.quickmedpub.com/		Yes
0387-1533Z	Journal of the Society of Rheology Japan		http://www.jstage.jst.go.jp/browse/rheology	The Society of Rheology	English,Japanese	0387-1533		rheology,physics	1999		2004-01-30T00:00:00Z	Physics,Science,Physics (General),Physics and Astronomy	Japan	NY			Yes
1946-7125Z	Dynamical Psychology : an International Interdisciplinary Journal of Complex Mental Processes		http://goertzel.org/dynapsyc/dynacon.html	Dynamical Psychology	English	1946-7125		psychology	1996		2003-09-16T00:00:00Z	Psychology,Philosophy. Psychology. Religion,Psychology,Social Sciences	United States	N	http://wp.dynapsyc.org/?page_id=11		Yes
0332-7531Z1503-8599	Nordlyd : Tromsø University Working Papers on Language & Linguistics / Institutt for Språk og Litteratur Universitetet i Tromsø	University of Tromsø working papers on language and linguistics	http://urn.nb.no/URN:NBN:no-7619	University of Tromsø	English,Norwegian	0332-7531	1503-8599	language,linguistics	2003		2004-02-20T14:46:42Z	Philology. Linguistics,Language and Literature,Linguistics,Languages and Literatures	Norway	N	http://www.ub.uit.no/munin/nordlyd/submissions.php?op=index		Yes
1612-8001Z	Samples : Notizen Projekte und Kurzbeiträge zur Popularmusikforschung		http://www.aspm-samples.de/	Arbeitskreis Studium Populärer Musik	English,German	1612-8001		research on popular music,jazz,rock,popular culture	2002		2005-08-26T18:49:50Z	Music,Music and books on Music,Music,Arts and Architecture	Germany	N			Yes
1980-6310Z	Boletim Petróleo Royalties e Região		http://www.royaltiesdopetroleo.ucam-campos.br/	Universidade Candido Mendes	Portuguese	1980-6310		oil,gas,royalties,regional economics,regional planning	2003		2013-07-04T11:27:45Z	Chemical technology,Technology,Chemical Technology,Technology and Engineering	Brazil	N	http://www.royaltiesdopetroleo.ucam-campos.br/index.php?cod=9		Yes
0366-5232Z	Caldasia : Boletín del Instituto de Ciencias Naturales Facultad de Ciencias de la Universidad Nacional de Colombia		http://www.scielo.org.co/scielo.php?script=sci_serial&pid=0366-5232&lng=pt&nrm=iso	Universidad Nacional de Colombia	Spanish,English	0366-5232		natural history,botany,plants	2005		2006-04-03T14:50:31Z	Biology (General),Science,Biology,Biology and Life Sciences	Colombia	N	http://www.scielo.org.co/revistas/cal/pinstruc.htm		Yes
2195-7819Z	Life Sciences Society and Policy		http://www.lsspjournal.com/	Springer	English	2195-7819		ethics,social issues,law,bioehtics,genetics	2013		2013-06-27T18:30:05Z	General Works,Multidisciplinary,General Works	Germany	Y	http://www.lsspjournal.com/about#apc	by	Yes
0379-8682Z0718-3402	Revista de Geografía Norte Grande		http://www.redalyc.org/revista.oa?id=300	Pontificia Universidad Católica de Chile	Spanish	0379-8682	0718-3402	geography	2002		2005-08-24T07:48:23Z	Geography (General),Geography. Anthropology. Recreation,Geography,Earth and Environmental Sciences	Chile	Y	http://redalyc.org/redalyc/media/normas/normcol300.html		Yes
0327-5566Z1851-1716	Ciencia Docencia y Tecnología		http://www.redalyc.org/revista.oa?id=145	Universidad Nacional de Entre Rios	Spanish	0327-5566	1851-1716	teaching,technology,multidisciplinary	2004		2005-08-24T07:48:23Z	General Works,Multidisciplinary,General Works	Argentina	N	http://redalyc.org/redalyc/media/normas/normcol145.html		Yes
1392-1649Z2029-2139	Environmental Research Engineering and Management	EREM	http://www.erem.ktu.lt	Technologija, Kaunas University of Technology	English	1392-1649	2029-2139	engineering,management,sustainable development,ecology,environmental economics,pollution prevention,waste management,environmental impact	2009		2010-11-25T10:51:32Z	Environmental sciences,Geography. Anthropology. Recreation,Environmental Sciences,Earth and Environmental Sciences	Lithuania	N	http://www.erem.ktu.lt/index.php/erem/about/submissions#authorGuidelines		Yes
1178-6221Z	Air Soil and Water Research		http://www.la-press.com/air-soil-and-water-research-journal-j99	Libertas Academica	English	1178-6221		microbiology,pollution	2008		2009-03-03T16:35:58Z	Environmental sciences,Geography. Anthropology. Recreation,Environmental Sciences,Earth and Environmental Sciences	New Zealand	Y	http://www.la-press.com/author_resources.php?folder_id=121	by	Yes
1864-6042Z	Economics : the Open-Access Open-Assessment e-Journal		http://www.economics-ejournal.org/	Kiel Institute for the World Economy	English	1864-6042		economics,economic theory,economic policy,econometrics	2007		2007-10-30T15:16:16Z	Economic theory. Demography,Social Sciences,Economics,Business and Economics	Germany	N	http://www.economics-ejournal.org/submission/guidelines-for-authors		Yes
1806-6976Z	SMAD Revista Electrónica Salud Mental Alcohol y Drogas		http://www.redalyc.org/revista.oa?id=803	Universidade de São Paulo	Spanish	1806-6976		mental health,alcoholism,psychoactive drugs	2005		2007-11-02T15:05:03Z	Therapeutics. Pharmacology,Medicine,Therapeutics,Medicine (General),Health Sciences	Brazil	N	http://redalyc.org/redalyc/media/normas/normcol803.html		Yes
1179-5484Z	Clinical Medicine Insights: Circulatory Respiratory and Pulmonary Medicine		http://www.la-press.com/journal.php?journal_id=44&issue_id=45	Libertas Academica	English	1179-5484		lung development,occupational factors,environmental factors,sleep	2010		2012-03-23T07:36:26Z	Internal medicine,Medicine,Internal medicine,Medicine (General),Health Sciences	New Zealand	Y	http://www.la-press.com/author_resources.php?folder_id=121	by	Yes
1865-1011Z	GMS Current Topics in Otorhinolaryngology Head and Neck Surgery		http://www.egms.de/en/journals/cto/index.shtml	German Medical Science, Düsseldorf	German,English	1865-1011		otorhinolaryngology,head,neck,medical sciences	2004		2008-02-04T17:05:46Z	Otorhinolaryngology,Medicine,Otorhinolaryngology,Medicine (General),Health Sciences	Germany	N	http://www.egms.de/static/en/terms.htm	by-nc-nd	Yes
1698-7799Z1698-7802	Foro de Educación : Pensamiento Cultura y Sociedad		http://www.forodeeducacion.com/	Foro de Educación	Spanish	1698-7799	1698-7802	thought,culture,society,pedagogy	2003		2008-03-12T16:22:34Z	Education (General),Education,Education,Social Sciences	Spain	N	http://www.forodeeducacion.com/forodeeducacion/Normas_de_colaboracion.html		Yes
1791-261XZ1792-3999	Review of Science Mathematics and ICT Education		http://xantho.lis.upatras.gr/pasithee/index.php/review/index	Metaichmio Publications	English,French	1791-261X	1792-3999	didactics,information technology	2007		2010-06-16T15:29:52Z	Education (General),Education,Education,Social Sciences	Greece	N	http://xantho.lis.upatras.gr/pasithee/index.php/review/about/submissions#authorGuidelines		Yes
2045-9238Z	Law Crime & History		http://www.pbs.plymouth.ac.uk/solon/journalnew.htm	SOLON	English	2045-9238		historical perspectives on crime	2011		2012-04-02T13:19:18Z	History (General),History (General) and history of Europe,History,History and Archaeology	United Kingdom	N	http://www.pbs.plymouth.ac.uk/solon/journalsubmissions.htm		Yes
1313-8014Z	Journal of International Research Publications : Materials Methods & Technologies		http://materials-technologies.ejournalnet.com/	Science & Education Foundation	English	1313-8014		materials science,technology	2006		2009-06-22T14:50:44Z	Science (General),Science,Science (General),Science General	Bulgaria	Y	http://www.ejournalnet.com/articles.html		Yes
1221-1273Z2065-3409	Analele Universităţii din Oradea Seria Geografie		http://istgeorelint.uoradea.ro/Reviste/Anale/anale.htm	Editura Universitatii din Oradea	English,French	1221-1273	2065-3409	human geography,physical geography,environmental science	2008		2010-02-08T10:03:48Z	Environmental sciences,Geography. Anthropology. Recreation,Environmental Sciences,Earth and Environmental Sciences,Geography (General),Geography. Anthropology. Recreation,Geography,Earth and Environmental Sciences	Romania	N	http://istgeorelint.uoradea.ro/Reviste/Anale/pr.html		Yes
2040-0748Z	International Journal of Gender Science and Technology	GST	http://genderandset.open.ac.uk	The Open University	English	2040-0748		engineering,gender studies,interdisciplinary studies	2009		2010-04-12T10:12:58Z	Women. Feminism,The family. Marriage. Woman,Social Sciences,Gender Studies,Social Sciences,Engineering (General). Civil engineering (General),Technology,General and Civil Engineering,Technology and Engineering	United Kingdom	N	http://genderandset.open.ac.uk/index.php/genderandset/about/submissions#authorGuidelines	by	Yes
0213-8093Z1989-6816	CIRIEC - España : Revista de Economía Pública Social y Cooperativa		http://www.ciriec-revistaeconomia.es/	CIRIEC	Spanish	0213-8093	1989-6816	social economy,cooperativism	1987		2010-11-17T12:53:18Z	Economic theory. Demography,Social Sciences,Economics,Business and Economics	Spain	N	http://www.ciriec-revistaeconomia.es/index.php?id_pagina=4		Yes
1847-3423Z1847-7461	Croatian Journal of Food Technology Biotecnology and Nutrition	Hrvatski Časopis za Prehrambenu Tehnologiju, Biotehnologiju i Nutricionizam	http://www.pbn.hr/en/journal.html	Croatian Society of Food Technologists, Biotechnologists and Nutritionists (CROFOST)	English,Croatian	1847-3423	1847-7461	chemical technology,food technology,food biotechnology,food sciences,nutrition	2009		2010-12-06T14:42:49Z	Nutrition. Foods and food supply,Home economics,Technology,Nutrition and Food Sciences,Agriculture and Food Sciences,Biotechnology,Chemical technology,Technology,Biotechnology,Life Sciences,Biology and Life Sciences	Croatia	N	http://www.pbn.hr/en/instauthor.html		Yes
1869-778XZ	Rationality Markets and Morals		http://www.rmm-journal.de/index.html	Frankfurt School Verlag	English	1869-778X		business ethics,political economy,decision theory,behavioral economics	2009		2010-02-02T13:22:13Z	Business,Commerce,Social Sciences,Business and Management,Business and Economics	Germany	N	http://www.rmm-journal.de/htdocs/how_to_submit.html	by-nc-nd	Yes
1998-1279Z	Journal of Language Technology & Entrepreneurship in Africa	Journal of Language, Technology and Entrepreneurship in Africa	http://ajol.info/index.php/jolte/	United States International University	English,Swahili	1998-1279		interdisciplinary,language,philology,communication,entrepreneurship,technology,finance,Africa	2007		2010-10-18T09:36:23Z	General Works,Multidisciplinary,General Works	Kenya	N	http://ajol.info/index.php/jolte/about/submissions#authorGuidelines		Yes
1308-8378Z	Signes Discours et Société		http://www.revue-signes.info/	Galatasaray University and AUF	French	1308-8378		communication,discourse analysis	2008		2011-12-07T13:25:15Z	Social sciences (General),Social Sciences,Social Sciences	Turkey	N	http://www.revue-signes.info/document.php?id=77		Yes
0135-1729Z	Visnyk NTUU KPI : Informatics Operation and Computer Science	Vestnik Kievskogo Politehničeskogo Instituta. Avtomatika i Elektropriborostroenie	http://it-visnyk.kpi.ua/?lang=en	National Technical University of Ukraine	Ukrainian,Russian	0135-1729		automation devices,data transmission systems,automated programming,artificial intelligence	2009		2011-12-14T09:24:11Z	Electronic computers. Computer science,Instruments and machines,Mathematics,Science,Computer Science,Technology and Engineering	Ukraine	N	http://it-visnyk.kpi.ua/?p=50&lang=en		Yes
1984-9729Z1984-8161	Revista de Direito Estado e Telecomunicações	RDET : Revista de Direito, Estado & Telecomunicacoes	http://www.getel.org/GETELSEER/index.php/rdet	Universidade de Brasília	Portuguese	1984-9729	1984-8161	telecommunications law,Brazil	2009		2011-02-23T12:38:14Z	Law of nations,Law,Law,Law and Political Science	Brazil	N	http://www.getel.org/GETELSEER/index.php/rdet/about/submissions#authorGuidelines	by-nc-nd	Yes
1582-3571Z	Analele Ştiinţifice Ale Universităţii Alexandru Ioan Cuza din IașiSectiunea II A : Genetica si Biologie Moleculara	Analele Stiintifice Ale Universitatii Sectiunea Ii A. Genetica si Biologie Moleculara	http://www.gbm.bio.uaic.ro/index.php/gbm	Alexandru Ioan Cuza University of Iasi	English,French	1582-3571		molecular genetics,molecular biology,microbiology,animal physiology	2003		2011-02-25T14:45:09Z	Genetics,Biology (General),Science,Genetics,Biology,Biology and Life Sciences	Romania	N	http://www.gbm.bio.uaic.ro/index.php/gbm/about/submissions#authorGuidelines		Yes
1646-933XZ	Educação Formação & Tecnologias	Educação, Formação and Tecnologias	http://eft.educom.pt	EDUCOM	Portuguese,English,Spanish	1646-933X		educational research,online learning,information technology	2008		2010-12-13T12:19:18Z	Education (General),Education,Education,Social Sciences	Portugal	N	http://eft.educom.pt/index.php/eft/about/submissions#authorGuidelines		Yes
1984-6487Z	Sexualidad Salud y Sociedad : Revista Latinoamericana	Sexualidad, Salud & Sociedad - Revista Latinoamericana	http://www.e-publicacoes.uerj.br/index.php/SexualidadSaludySociedad/index	Centro Latinoamericano de Sexualidad y Derechos Humanos	Portuguese,Spanish,English	1984-6487		gender studies,sexuality and society,reproductive health	2009		2011-05-04T17:13:37Z	Women. Feminism,The family. Marriage. Woman,Social Sciences,Gender Studies,Social Sciences,Public aspects of medicine,Medicine,Public Health,Health Sciences	Brazil	N	http://www.e-publicacoes.uerj.br/index.php/SexualidadSaludySociedad/about/submissions#authorGuidelines		Yes
2161-4105Z2161-4512	Journal of Cosmetics Dermatological Sciences and Applications		http://www.scirp.org/journal/jcdsa	Scientific Research Publishing	English	2161-4105	2161-4512	toiletries,perfumery,cosmetic chemistry,laser treatment,plastic surgery	2011		2011-07-17T17:55:01Z	Chemistry,Science,Chemistry (General),Chemistry	United States	Y	http://www.scirp.org/journal/jcdsa/	by	Yes
0974-7192Z	Journal of Literature Culture and Media Studies	JLCMS : Journal of Literature, Culture & Media Studies	http://www.inflibnet.ac.in/ojs/index.php/JLCMS/index	Chandra Publications	English	0974-7192		cultural studies,language,literature,communication studies	2009		2011-05-13T15:04:38Z	Language and Literature,Languages and Literatures	India	N	http://www.inflibnet.ac.in/ojs/index.php/JLCMS/about/submissions#authorGuidelines		Yes
2223-523XZ2071-2987	International Journal of Design Analysis and Tools for Integrated Circuits and Systems		http://ijdatics.distributedthought.com/	Solari (HK) Co., Hong Kong	English	2223-523X	2071-2987	electric circuits,computer-aided design	2011		2011-08-09T10:19:14Z	Electrical engineering. Electronics. Nuclear engineering,Technology,Electrical and Nuclear Engineering,Technology and Engineering	Hong Kong	N	http://ijdatics.distributedthought.com/for_authors.html	by-nc-sa	Yes
1792-8036Z	Engineering Technology & Applied Science Research	ETASR : Engineering, Technology and Applied Science Research	http://www.etasr.com/index.php/ETASR	Engineering, Technology & Applied Science Research	English	1792-8036		engineering,technology,science applications	2011		2011-09-01T13:48:59Z	Engineering (General). Civil engineering (General),Technology,General and Civil Engineering,Technology and Engineering	Greece	Y	http://www.etasr.com/index.php/ETASR/about/submissions#authorFees	by	Yes
1405-8421Z	Economía Sociedad y Territorio	EST : Economia, Sociedad & Territorio	http://www.redalyc.org/revista.oa?id=111	El Colegio Mexiquense	Spanish,Portuguese,English	1405-8421		human geography,social conditions,economic conditions	1997		2011-10-12T09:13:50Z	Geography (General),Geography. Anthropology. Recreation,Geography,Earth and Environmental Sciences,Social sciences (General),Social Sciences,Social Sciences	Mexico	N	http://redalyc.org/redalyc/media/normas/normcol111.html		Yes
1223-6578Z2247-2711	Scientific Annals of Alexandru Ioan Cuza University of Iasi. New Series Section 2. Vegetal Biology	Analele Ştiinţifice ale Universităţii Alexandru Ioan Cuza din Iaşi Serie nouă, Secţiunea II a. Biologie vegetală	http://www.bio.uaic.ro/publicatii/anale_vegetala/anale_veg_index.html	Alexandru Ioan Cuza University of Iasi	English	1223-6578	2247-2711	phytosociology,taxonomy,cytology,mycology	2004		2012-01-10T14:30:59Z	Biology (General),Science,Biology,Biology and Life Sciences	Romania	N	http://www.bio.uaic.ro/publicatii/anale_vegetala/guide/guide.html		Yes
1647-9254Z	European Journal of Tourism Hospitality and Recreation	EJTHR	http://www.ejthr.com	Instituto Politécnico de Leiria	English	1647-9254		tourism research,hospitality,tourism recreation,leisure	2010		2012-01-11T09:45:20Z	Geography (General),Geography. Anthropology. Recreation,Geography,Earth and Environmental Sciences	Portugal	N	http://www.ejthr.com/info/ver_pagina.php?tab=menu_topo&id=3		Yes
2320-3765Z2278-8875	International Journal of Advanced Research in Electrical Electronics and Instrumentation Engineering		http://www.ijareeie.com	S&S Publications	English	2320-3765	2278-8875	electrical engineering,electronics engineering,instrumentation engineering	2012		2013-05-12T11:22:52Z	Electrical engineering. Electronics. Nuclear engineering,Technology,Electrical and Nuclear Engineering,Technology and Engineering	India	Y	http://www.ijareeie.com/authors/publication-fee		Yes
2321-2411Z2321-242X	The SIJ Transactions on Industrial Financial & Business Management	IFBM	http://www.thesij.com/ifbm.php	The Standard International Journals	English	2321-2411	2321-242X	business law,business ethics,corporate social responsibility,marketing theory,business finance	2013		2013-05-22T20:30:14Z	General Works,Multidisciplinary,General Works	India	Y	http://www.thesij.com/authors_guide.php		Yes
1805-6830Z	Czech Journal of Social Sciences Business and Economics		http://www.cjssbe.cz	University Service Ltd.	English	1805-6830		education,pedagogy,linguistics,history,marketing	2012		2013-05-30T15:27:11Z	General Works,Multidisciplinary,General Works	Czech Republic	N	http://www.cjssbe.cz/instructions-for-authors/	by-nc-nd	Yes
2145-4426Z2145-7778	TRILOGÍA : Ciencia Tecnología y Sociedad		http://trilogia.itm.edu.co	Instituto Tecnológico Metropolitano	Spanish	2145-4426	2145-7778	technology,society,innovation,education,governance	2009		2013-05-30T15:48:02Z	General Works,Multidisciplinary,General Works	Colombia	N	http://itmojs.itm.edu.co/index.php/trilogia/about/submissions#authorGuidelines		Yes
2224-3240Z2224-3259	Journal of Law Policy and Globalization		http://www.iiste.org/Journals/index.php/JLPG	International Institute for Science, Technology and Education	English	2224-3240	2224-3259	international law,corporate law,public policy	2012		2013-04-29T17:48:19Z	Law in general. Comparative and uniform law. Jurisprudence,Law,Law,Law and Political Science	Hong Kong	CON	http://www.iiste.org/Journals/index.php/JLPG	by	Yes
2278-0246Z	International Journal of Analytical Pharmaceutical and Biomedical Sciences		http://www.ijapbs.com	International Journal of Analytical, Pharmaceutical and Biomedical Sciences	English	2278-0246		electrochemistry,nanotechnology,microbiology,cellular biochemisty,pharmacology	2012		2013-05-03T12:48:04Z	Therapeutics. Pharmacology,Medicine,Therapeutics,Medicine (General),Health Sciences	India	CON	http://www.ijapbs.com/author-guidelines.php		Yes
2077-4907Z	Law Democracy & Development	LDDD : Law, Democracy and Development	http://www.ajol.info/index.php/ldd	University of the Western Cape	English	2077-4907		law and democracy,jurisprudence and democracy	2010		2013-02-19T19:09:21Z	Law in general. Comparative and uniform law. Jurisprudence,Law,Law,Law and Political Science	South Africa	CON			Yes
0719-1553Z	Revista Sujeto Subjetividad y Cultura		http://psicologia.uarcis.cl/revista/index.php/RSSCN1/issue/current	Universidad de Arte y Ciencias Sociales	Spanish	0719-1553		psychoanalysis,group analysis,philosophy,art,social sciences	2011		2013-04-01T22:49:10Z	Psychology,Philosophy. Psychology. Religion,Psychology,Social Sciences	Chile	N	http://psicologia.uarcis.cl/revista/index.php/RSSCN1/about/submissions#authorGuidelines	by-sa	Yes
2029-7491Z2029-6169	Business Management and Education	Business, Management & Education	http://www.bme.vgtu.lt	Vilnius Gediminas Technical University	English	2029-7491	2029-6169	economics,business,management,higher education	2011		2012-03-05T13:52:23Z	Business,Commerce,Social Sciences,Business and Management,Business and Economics,Special aspects of education,Education,Education,Social Sciences	Lithuania	N	http://www.bme.vgtu.lt/index.php/bme/pages/view/info		Yes
2029-6320Z2029-6339	Coactivity : Philosophy Communication	Santalka : Filosofija, Komunikacija	http://www.cpc.vgtu.lt	Vilnius Gediminas Technical University	Lithuanian,English	2029-6320	2029-6339	philosophy,communication,creative industries	2011		2012-03-08T11:56:13Z	Philosophy (General),Philosophy. Psychology. Religion,Philosophy,Philosophy and Religion,Communication. Mass media,Philology. Linguistics,Language and Literature,Media and communication,Social Sciences	Lithuania	N	http://www.cpc.vgtu.lt/index.php/cpc/pages/view/info	by	Yes
2237-3667Z	Reunir : Revista de Administração Contabilidade e Sustentabilidade		http://150.165.111.246/revistaadmin/index.php/uacc/index	Universidade Federal de Campina Grande	Portuguese	2237-3667		accounting,industrial management,environmental management	2011		2012-04-24T10:05:21Z	Environmental sciences,Geography. Anthropology. Recreation,Environmental Sciences,Earth and Environmental Sciences,Management. Industrial management,Industries. Land use. Labor,Social Sciences,Business and Management,Business and Economics	Brazil	Y	http://150.165.111.246/revistaadmin/index.php/uacc/about/submissions#authorGuidelines		Yes
2032-0418Z	Facts Views & Vision in ObGyn		http://www.fvvo.be	Universa Press	English	2032-0418		women's health,perinatal care,adnexal diseases,vaginal diseases,reproductive medicine,pregnancy complications	2009		2013-02-01T10:05:41Z	Gynecology and obstetrics,Medicine,Gynecology and Obstetrics,Medicine (General),Health Sciences	Belgium	N	http://www.fvvo.be/for-authors/information-for-authors/		Yes
2192-113XZ	Journal of Cloud Computing : Advances Systems and Applications		http://www.journalofcloudcomputing.com/	Springer	English	2192-113X		cloud programming,cloud security,cloud architectures,cloud data mining,network communications	2012		2013-06-27T21:08:06Z	Electronic computers. Computer science,Instruments and machines,Mathematics,Science,Computer Science,Technology and Engineering	Germany	Y	http://www.journalofcloudcomputing.com/about#apc	by	Yes
2232-0857Z2180-1541	Elektropika : International Journal of Electrical Electronic Engineering and Technology		http://elektropika.eng.usm.my/	Universiti Sains Malaysia	English	2232-0857	2180-1541	robotics,vision and signal processing,telecommunications,wireless technology,control systems	2011		2013-07-02T13:08:12Z	Electrical engineering. Electronics. Nuclear engineering,Technology,Electrical and Nuclear Engineering,Technology and Engineering	Malaysia	N	http://elektropika.eng.usm.my/?page_id=25		Yes
2285-2204Z2285-3499	Journal of Public Administration Finance and Law		http://www.jopafl.com/	Technopress	English	2285-2204	2285-3499	economic policy,business	2012		2013-07-02T20:58:51Z	General Works,Multidisciplinary,General Works	Romania	N	http://www.jopafl.com/submission.html		Yes
2334-847XZ2334-8496	International Journal of Cognitive Research in Science Engineering and Education		http://www.ijcrsee.com	Association for the Development of Science, Engineering and Education	English	2334-847X	2334-8496	science,engineering,education	2013		2013-07-07T09:19:13Z	General Works,Multidisciplinary,General Works	Serbia	N	http://www.ijcrsee.com/index.php/ijcrsee/about/submissions#authorGuidelines	by	Yes
1411-4801Z2302-8181	Indonesian Journal of Gastroenterology Hepatology and Digestive Endoscopy		http://www.ina-jghe.com/	Interna Publishing	English	1411-4801	2302-8181	disorders of the digestive system,the liver,endoscopy	2009		2013-09-16T20:56:41Z	Diseases of the digestive system. Gastroenterology,Specialties of internal medicine,Internal medicine,Medicine,Gastroenterology,Medicine (General),Health Sciences	Indonesia	N	http://www.ina-jghe.com/?page=content.view&alias=for_authors		Yes
2197-411XZ	Future of Food : Journal on Food Agriculture and Society		http://futureoffoodjournal.org	University of Kassel	English	2197-411X		food,agriculture,sustainable development,political ecology,agroecology,organic agriculture	2013		2013-09-25T20:40:33Z	Agriculture (General),Agriculture,Agriculture (General),Agriculture and Food Sciences	Germany	N	http://futureoffoodjournal.org/index.php/journal/about/submissions#onlineSubmissions		Yes
2346-0504Z2346-0601	Realitas : Revista de Ciencias Sociales Humanas y Artes		http://unireformada.edu.co/index.php/investigaciones/realitas-revista-de-ciencias-sociales-humanas-y-artes-issn-2346-0504	Ediciones Corporación Universitaria Reformada	Spanish	2346-0504	2346-0601	social sciences,humanities,arts	2013		2013-10-11T15:27:46Z	General Works,Multidisciplinary,General Works	Colombia	N	http://unireformada.edu.co/index.php/envios/normas-para-la-presentacion-de-contribuciones	by-nc-nd	Yes
1848-9257Z	Journal of Sustainable Development of Energy Water and Environment Systems		http://www.sdewes.org/jsdewes	SDEWES Centre	English	1848-9257		policy,technology,natural resources,economics,transport,food production	2013		2013-08-07T14:16:05Z	Environmental sciences,Geography. Anthropology. Recreation,Environmental Sciences,Earth and Environmental Sciences	Croatia	CON	http://www.sdewes.org/jsdewes/fee.php	by	Yes
1318-2927Z	Bulletin : Economics Organisation and Informatics in Healthcare	Bilten : Ekonomika, Organizacija, Informatika v Zdravstvu	http://versita.com/beoih/	Versita	English	1318-2927		public health,healthcare,health informatics,economics,organization	2011		2013-10-24T14:27:00Z	Public aspects of medicine,Medicine,Public Health,Health Sciences	Slovenia	N	http://versita.com/beoih/authors/		Yes
2345-3168Z	International Journal of Healthcare Insurance and Equity		http://ijhie.com/	Health Insurance Organization	English	2345-3168		health economy,economics,health care	2013		2013-10-30T15:52:30Z	Medicine (General),Medicine,Medicine (General),Health Sciences	Iran	N	http://ijhie.com/about/submissions#onlineSubmissions		Yes
2335-2736Z	Slovenščina 2.0 : Empirične Aplikativne in Interdisciplinarne Raziskave	Slovenščina 2.0 : Empirical, Applied and Interdisciplinary Research	http://www.trojina.org/slovenscina2.0/si/zadnja-stevilka/	Trojina, Institute for Applied Slovene Studies	Slovenian,English	2335-2736		corpus linguistics,computational linguistics,speech synthesis,monolingual lexicography,bilingual lexicography	2013		2013-08-21T18:57:22Z	Philology. Linguistics,Language and Literature,Linguistics,Languages and Literatures	Slovenia	N	http://www.trojina.org/slovenscina2.0/si/oddaja-prispevkov/	by-sa	Yes
0579-9384Z1728-2101	Vestnik Moskovskogo Universiteta. Serija 2 Chimija	Moscow University Chemistry Bulletin	http://www.chem.msu.su/rus/vmgu/	Izdatel'stvo Moskovskogo universiteta (Moscow State University)	Russian	0579-9384	1728-2101	chemistry,organic chemistry,physical chemistry,chemistry education,medicinal chemistry	1998		2003-07-22T00:00:00Z	Chemistry,Science,Chemistry (General),Chemistry	Russia	NY	http://www.chem.msu.su/rus/vmgu/vmgu-pravila-dlya-avtorov.pdf		Yes
1806-4981Z1983-7070	Comunicação Mídia e Consumo		http://revistacmc.espm.br	Escola Superior de Propaganda e Marketing	Portuguese,Spanish	1806-4981	1983-7070	consumerism,communication	2004		2010-03-01T14:04:48Z	Communication. Mass media,Philology. Linguistics,Language and Literature,Media and communication,Social Sciences	Brazil	N	http://revistacmc.espm.br/index.php/revistacmc/about/submissions#authorGuidelines	by	Yes
0378-6323Z0973-3922	Indian Journal of Dermatology Venereology and Leprology		http://www.ijdvl.com/	Medknow Publications	English	0378-6323	0973-3922	dermatology,venereology,leprology,medicine	1990		2003-11-24T00:00:00Z	Dermatology,Medicine,Dermatology,Medicine (General),Health Sciences	India	N	http://www.ijdvl.com/contributors.asp	by-nc-sa	Yes
1748-0116Z	Romantic Textualities : Literature and Print Culture 1780–1840		http://www.cardiff.ac.uk/encap/journals/romtext/index.html	Cardiff University	English	1748-0116		book history,textual studies,bibliographical studies,Romantic literature	2005		2006-05-15T13:08:51Z	Literature (General),Language and Literature,Languages and Literatures	United Kingdom	N	http://www.cf.ac.uk/encap/romtext/submit.html		Yes
0386-2208Z1349-2896	Proceedings of the Japan Academy Series B Physical and Biological Sciences	PJAB	http://www.jstage.jst.go.jp/browse/pjab	Japan Academy	English	0386-2208	1349-2896	physical sciences,biological sciences	2003		2004-07-02T16:56:31Z	Physiology,Science,Physiology,Biology,Biology and Life Sciences,Biology (General),Science,Biology,Biology and Life Sciences	Japan	N	https://www.jstage.jst.go.jp/jstage/pub/pjab/pdf/pja_b_inst.pdf	by-nc	Yes
1549-8549Z	Journal of Philosophy Science and Law		http://www6.miami.edu/ethics/jpsl/index.html	The Journal of Philosophy, Science and Law	English	1549-8549		technology,ethics,legal system,education	2001		2004-09-17T14:08:45Z	General Works,Multidisciplinary,General Works	United States	N	http://www6.miami.edu/ethics/jpsl/submission.html		Yes
1470-5648Z	Consciousness Literature and the Arts		http://blackboard.lincoln.ac.uk/bbcswebdav/users/dmeyerdinkgrafe/index.htm	University of Wales	English	1470-5648		philosophy,cognitive science,psychology,neuroscience,computer science,physics,arts,literature	2000		2004-11-16T16:09:26Z	Neurosciences. Biological psychiatry. Neuropsychiatry,Internal medicine,Medicine,Neurology,Medicine (General),Health Sciences,Literature (General),Language and Literature,Languages and Literatures,Arts in general,Fine Arts,Arts in general,Arts and Architecture	United Kingdom	N	http://blackboard.lincoln.ac.uk/bbcswebdav/users/dmeyerdinkgrafe/submissions.html		Yes
1861-3675Z	Science Technology & Innovation Studies	STI Studies	http://www.sti-studies.de/ojs/index.php/sti	University of Dortmund	English	1861-3675		knowledge and society,technology,innovation studies	2005		2006-03-22T10:27:47Z	Technology (General),Technology,Technology (General),Technology and Engineering,Social sciences (General),Social Sciences,Social Sciences	Germany	N	http://www.sti-studies.de/ojs/index.php/sti/about/submissions#authorGuidelines		Yes
1027-5207Z	European Journal of Open Distance and e-Learning	EURODL	http://www.eurodl.org/	European Distance and E Learning Network	English	1027-5207		distance learning,e-learning	1997		2007-01-25T11:36:20Z	Special aspects of education,Education,Education,Social Sciences	Hungary	N	http://www.eurodl.org/pages/guidelines/index.html		Yes
0365-0359Z1825-1242	Atti della Accademia Peloritana dei Pericolanti : Classe di Scienze Fisiche Matematiche e Naturali	AAPP Physical, Mathematical, and Natural Sciences	http://www.actapeloritana.it	Accademia Peloritana dei Pericolanti	English,Italian	0365-0359	1825-1242	physical sciences,mathematical sciences,computer science,life sciences	2004		2005-10-13T12:12:39Z	Science (General),Science,Science (General),Science General	Italy	N	http://cab.unime.it/journals/index.php/AAPP/about/submissions#authorGuidelines	by	Yes
1131-5598Z1988-2408	Arte Individuo y Sociedad		http://revistas.ucm.es/index.php/ARIS/	Universidad Complutense de Madrid	Spanish	1131-5598	1988-2408	art	1988		2005-10-28T09:40:56Z	History of the arts,Arts in general,Fine Arts,History of arts,Arts and Architecture	Spain	N	http://revistas.ucm.es/index.php/ARIS/about/submissions#authorGuidelines		Yes
1545-4517Z	Action Criticism and Theory for Music Education		http://act.maydaygroup.org/	Southern Illinois University Edwardsville	English	1545-4517		education,music,philosophy,sociology,history,psychology,curriculum studies	2002		2005-11-15T09:52:21Z	Music,Music and books on Music,Music,Arts and Architecture	United States	N	http://act.maydaygroup.org/php/policies.php		Yes
1551-4730Z	Lingua Romana : a Journal of French Italian and Romanian Culture		http://linguaromana.byu.edu/	Brigham Young University	English,French,Italian,Romanian	1551-4730		Romanian literature and culture,Italian literature and culture,French literature and culture	2002		2006-08-01T16:27:33Z	Romanic languages,Language and Literature,Languages and Literatures	United States	N	http://linguaromana.byu.edu/submissions.html		Yes
1944-3676Z	The Baltic International Yearbook of Cognition Logic and Communication		http://thebalticyearbook.org/	New Prairie Press	English	1944-3676		philosophy,logic,cognition	2007		2009-04-07T09:13:48Z	Philosophy (General),Philosophy. Psychology. Religion,Philosophy,Philosophy and Religion	United States	N	http://thebalticyearbook.org/journals/baltic/about/submissions#authorGuidelines		Yes
1178-7015Z	Clinical Cosmetic and Investigational Dermatology		http://www.dovepress.com/clinical-cosmetic-and-investigational-dermatology-journal	Dove Medical Press	English	1178-7015		skin disease,cosmetic interventions,skin development and aging	2008		2009-04-15T14:13:25Z	Dermatology,Medicine,Dermatology,Medicine (General),Health Sciences	United Kingdom	Y	http://www.dovepress.com/journal_pricing_bands.php?journal_id=33		Yes
1177-8903Z	Nanotechnology Science and Applications		http://www.dovepress.com/nanotechnology-science-and-applications-journal	Dove Medical Press	English	1177-8903		nano-materials,particles,nano-structures and fabrication,diagnostics,analytics,drug delivery,toxicology	2008		2009-04-21T13:21:43Z	Biotechnology,Chemical technology,Technology,Biotechnology,Life Sciences,Biology and Life Sciences	United Kingdom	Y	http://www.dovepress.com/author_guidelines.php?folder_id=222		Yes
1178-7007Z	Diabetes Metabolic Syndrome and Obesity : Targets and Therapy		http://www.dovepress.com/diabetes-metabolic-syndrome-and-obesity-targets-and-therapy-journal	Dove Medical Press	English	1178-7007		diabetes,metabolic syndrome,obesity	2008		2009-04-23T15:08:50Z	Medicine (General),Medicine,Medicine (General),Health Sciences	United Kingdom	Y	http://www.dovepress.com/journal_pricing_bands.php?journal_id=32		Yes
1757-7241Z	Scandinavian Journal of Trauma Resuscitation and Emergency Medicine	SJTREM	http://www.sjtrem.com/	BioMed Central	English	1757-7241		epidemiology,etiology,pathophysiology,diagnosis,treatment,rehabilitation,prevention of acute illnesses,prevention of trauma	2008		2008-08-01T11:43:04Z	Medical emergencies. Critical care. Intensive care. First aid,Internal medicine,Medicine,Internal medicine,Medicine (General),Health Sciences	United Kingdom	N	http://www.sjtrem.com/info/instructions/default.asp	by	Yes
0210-1963Z1988-303X	Arbor : Ciencia Pensamiento y Cultura		http://arbor.revistas.csic.es/index.php/arbor/	Consejo Superior de Investigaciones Científicas	Spanish,Portuguese,English,French,German	0210-1963	1988-303X	cultural studies,cultural trends,humanities,social issues,social philosophy	2006		2008-04-13T14:08:26Z	Social sciences (General),Social Sciences,Social Sciences,Science (General),Science,Science (General),Science General	Spain	N	http://arbor.revistas.csic.es/index.php/arbor/about/submissions#authorGuidelines	by-nc	Yes
1970-9889Z1970-9870	TeMA : Journal of Land Use Mobility and Environment		http://www.tema.unina.it/index.php/tema	Università di Napoli Federico II	Italian	1970-9889	1970-9870	urban planning,transport,environment	2007		2009-02-04T16:56:39Z	Architecture,Fine Arts,Architecture,Arts and Architecture	Italy	N	http://www.tema.unina.it/index.php/tema/about/submissions#authorGuidelines	by	Yes
1179-1365Z	Drug Healthcare and Patient Safety		http://www.dovepress.com/drug-healthcare-and-patient-safety-journal	Dove Medical Press	English	1179-1365		patient safety,drug therapy	2009		2010-01-11T12:48:42Z	Medicine (General),Medicine,Medicine (General),Health Sciences	New Zealand	Y	http://www.dovepress.com/journal_pricing_bands.php?journal_id=44		Yes
1804-0519Z1804-0527	Perspectives of Innovations Economics and Business	PIEB	http://academicpublishingplatforms.com/journal.php?journal=PIEB	Prague Development Center, s.r.o.	English,Russian	1804-0519	1804-0527	business development,business innovations	2009		2010-01-21T13:27:07Z	Business,Commerce,Social Sciences,Business and Management,Business and Economics	Czech Republic	Y	http://academicpublishingplatforms.com/journal.php?journal=PIEB#guides_to_authors	by	Yes
2177-1383Z	Fides : Revista de Filosofia do Direito do Estado e da Sociedade		http://www.revistafides.com	Universidade Federal do Rio Grande do Norte	Portuguese	2177-1383		philosophy of law,ethics,sociology of law	2010		2010-09-30T13:52:12Z	Law in general. Comparative and uniform law. Jurisprudence,Law,Law,Law and Political Science	Brazil	N	http://www.revistafides.com/ojs/index.php/br/about/submissions#onlineSubmissions	by	Yes
1224-7359Z	Ovidius University Annals : Series Physical Education and Sport/Science Movement and Health		http://www.analefefs.ro/en/	Ovidius University Press	English	1224-7359		sport,performance,physical education,kinetotherapy	2009		2009-07-13T13:12:28Z	Sports,Recreation. Leisure,Geography. Anthropology. Recreation,Sports Science,Social Sciences	Romania	Y	http://www.analefefs.ro/en/	by-nc-nd	Yes
1743-159XZ	Annual Review of Education Communication and Language Sciences	ARECLS	http://research.ncl.ac.uk/ARECLS/	Newcastle University	English	1743-159X		linguistics,applied linguistics,language teaching	2004		2010-12-07T16:57:21Z	Education (General),Education,Education,Social Sciences	United Kingdom	N	http://research.ncl.ac.uk/ARECLS/submissions.html		Yes
1791-874XZ	International Journal of Sport Management Recreation & Tourism	International Journal of Sport Management, Recreation and Tourism	http://www.ijsmart.eu/	International Journal of Sport Management, Recreation & Tourism	English	1791-874X		sport management,recreation,tourism,sports tourism,sports marketing,outdoor	2008		2010-12-09T07:36:28Z	Sports,Recreation. Leisure,Geography. Anthropology. Recreation,Sports Science,Social Sciences	Canada	N	http://www.ijsmart.eu/?p=113		Yes
1179-139XZ	International Journal of Interferon Cytokine and Mediator Research	International Journal of Interferon, Cytokine & Mediator Research	http://www.dovepress.com/international-journal-of-interferon-cytokine-and-mediator-research-journal	Dove Medical Press	English	1179-139X		inflammation,inflammatory diseases,inflammatory mediators,cytokines,interferons	2010		2010-12-21T13:04:47Z	Pathology,Medicine,Pathology,Medicine (General),Health Sciences	United Kingdom	Y	http://www.dovepress.com/author_guidelines.php?folder_id=222		Yes
1687-398XZ1687-3998	ICGST International Journal on Graphics Vision and Image Processing		http://www.icgst.com/gvip/journal/Issues.html	ICGST	English	1687-398X	1687-3998	graphics,vision,image processing,computer-aided graphic design	2005		2010-12-30T09:06:00Z	Electronic computers. Computer science,Instruments and machines,Mathematics,Science,Computer Science,Technology and Engineering	United Arab Emirates	Y	http://www.icgst.com/fee.html	by	Yes
2282-0930Z	Epidemiology Biostatistics and Public Health		http://www.ebph.it/	Italian Society of Medical Statistics and Clinical Epidemiology	English	2282-0930		preventive medicine,health policy	2013		2013-03-18T11:02:28Z	Public aspects of medicine,Medicine,Public Health,Health Sciences	Italy	N	http://ebph.it/about/submissions#authorGuidelines		Yes
1794-6670Z	Cuadernos de Música Artes Visuales y Artes Escénicas	Cuadernos de Musica, Artes Visuales y Artes Escenicas : Journal of Music, Visual Arts, and Performing Arts	http://cuadernosmusicayartes.javeriana.edu.co/	Pontificia Universidad Javeriana	Spanish,Portuguese,English	1794-6670		music,musicology,arts history,visual arts,performing arts,Latin America	2004		2010-10-11T12:42:19Z	General Works,Multidisciplinary,General Works	Colombia	N	http://cuadernosmusicayartes.javeriana.edu.co/index.php?option=com_content&view=article&id=24&Itemid=16		Yes
0976-2329Z0975-3346	Trade Law and Development	TL&D	http://www.tradelawdevelopment.com/	National Law University	English	0976-2329	0975-3346	international trade,economic laws,world trade,development,business	2009		2010-06-30T11:46:19Z	General Works,Multidisciplinary,General Works	India	N	http://www.tradelawdevelopment.com/index.php/tld/about/submissions#authorGuidelines	by-nc-nd	Yes
0495-4548Z2171-679X	THEORIA : an International Journal for Theory History and Fundations of Science		http://www.ehu.es/theoria	University of the Basque Country	English,Spanish	0495-4548	2171-679X	philosophy of science,history of science,philosophy of logic,analytic philosophy	2003		2010-05-11T16:04:28Z	Philosophy (General),Philosophy. Psychology. Religion,Philosophy,Philosophy and Religion	Spain	N	http://www.ehu.es/ojs/index.php/THEORIA/about/submissions#authorGuidelines		Yes
2036-1602Z	In_Bo : Ricerche e Progetti per il Territorio la Città e l'Architettura	In Bo : : Ricerche e Progetti per il Territorio, la Città e l'Architettura	http://in_bo.cib.unibo.it/	University of Bologna	Italian,English	2036-1602		territorial planning,urban planning,architecture,cities and towns	2008		2012-03-22T08:09:48Z	Architecture,Fine Arts,Architecture,Arts and Architecture	Italy	N	http://in_bo.unibo.it/about/submissions#authorGuidelines	by-nc	Yes
1338-5178Z	Journal of Microbiology Biotechnology and Food Sciences	JMBFS	http://www.jmbfs.org	Slovak University of Agriculture	English	1338-5178		chemical technology,biotechnology,food sciences,microbiology	2011		2012-03-30T10:45:36Z	Biotechnology,Chemical technology,Technology,Biotechnology,Life Sciences,Biology and Life Sciences,Nutrition. Foods and food supply,Home economics,Technology,Nutrition and Food Sciences,Agriculture and Food Sciences,Microbiology,Science,Microbiology,Biology,Biology and Life Sciences	Slovakia	N	http://www.jmbfs.org/instructions-for-authors/	by-nc	Yes
1678-1007Z1981-7746	Trabalho Educação e Saúde		http://www.scielo.br/scielo.php?script=sci_serial&pid=1981-7746&lng=en&nrm=iso	Fundação Oswaldo Cruz, Escola Politécnica de Saúde Joaquim Venâncio	Portuguese	1678-1007	1981-7746	public health,research,education	2010		2012-05-09T13:47:03Z	Public aspects of medicine,Medicine,Public Health,Health Sciences	Brazil	N	http://www.scielo.br/revistas/tes/iinstruc.htm		Yes
1992-5743Z	Journal of Armed Forces Medical College Bangladesh	JAFMC	http://www.banglajol.info/index.php/JAFMC/index	Armed Forces Medical College	English	1992-5743		medicine	2008		2011-10-04T13:44:47Z	Medicine (General),Medicine,Medicine (General),Health Sciences	Bangladesh	N	http://www.banglajol.info/index.php/JAFMC/about/submissions#authorGuidelines		Yes
1982-257XZ1984-9834	Revista IDeAS : Interfaces em Desenvolvimento Agricultura e Sociedade	Revista Interfaces em Desenvolvimento, Agricultura & Sociedade	http://www.ufrrj.br/cpda/ideas/	Universidade Federal Rural do Rio de Janeiro	Portuguese,Spanish	1982-257X	1984-9834	society and agriculture,rural development	2007		2011-02-17T16:21:38Z	Social sciences (General),Social Sciences,Social Sciences	Brazil	N	http://r1.ufrrj.br/cpda/ideas/normasdepublicacao.php		Yes
1179-5506Z	Clinical Medicine Insights : Ear Nose and Throat		http://www.la-press.com/clinical-medicine-insights-ear-nose-and-throat-journal-j61	Libertas Academica	English	1179-5506		disorders of the ear,nose and throat,head and neck disorders	2010		2011-02-22T09:44:36Z	Otorhinolaryngology,Medicine,Otorhinolaryngology,Medicine (General),Health Sciences	New Zealand	Y	http://www.la-press.com/author_resources.php?folder_id=121	by	Yes
2077-1142Z	Asian Journal of Engineering Sciences & Technology		http://ajest.iqra.edu.pk/journal.php	Iqra University	English	2077-1142		telecommunication,computer science	2011		2011-11-14T14:55:32Z	Science (General),Science,Science (General),Science General	Pakistan	N			Yes
1913-3715Z1913-3723	International Journal of Communications Network and System Sciences		http://www.scirp.org/journal/ijcns	Scientific Research Publishing	English	1913-3715	1913-3723	cognitive radio,global networks,next generation network architectures,wireless personal communications	2008		2011-03-17T16:38:44Z	Electronic computers. Computer science,Instruments and machines,Mathematics,Science,Computer Science,Technology and Engineering	United States	Y	http://www.scirp.org/journal/ijcns/	by	Yes
2171-9381Z	Revista de la Sociedad Otorrinolaringológica de Castilla y León Cantabria y La Rioja		http://www.revistaorl.com	Sociedad Otorrinolaringológica de Castilla y León, Cantabria y La Rioja	Spanish	2171-9381		medicine,ear,nose,throat disorders	2010		2011-03-21T15:38:08Z	Otorhinolaryngology,Medicine,Otorhinolaryngology,Medicine (General),Health Sciences	Spain	N	https://sites.google.com/site/revistasociedadorlclcrpublic/normas	by-nc-nd	Yes
1948-9579Z	World Articles in Ear Nose and Throat		http://www.waent.org	Cumberland Otolaryngology Consultants	English	1948-9579		head and neck,ear,nose,throat,surgery	2008		2011-04-03T16:48:07Z	Otorhinolaryngology,Medicine,Otorhinolaryngology,Medicine (General),Health Sciences	United States	N	http://www.waent.org/info_for_authors.htm		Yes
1710-1484Z1710-1492	Allergy Asthma & Clinical Immunology	AACI : Allergy, Asthma and Clinical Immunology	http://www.aacijournal.com/	BioMed Central	English	1710-1484	1710-1492	immune system,allergic diseases,hypersensitivity	2005		2011-04-28T16:38:27Z	Immunologic diseases. Allergy,Specialties of internal medicine,Internal medicine,Medicine,Allergy and Immunology,Medicine (General),Health Sciences	United Kingdom	Y	http://www.aacijournal.com/about#apc	by	Yes
1537-1964Z	Panace@ : Revista de Medicina Lenguaje y Traducción		http://medtrad.org/panacea.html	Tremédica: Asociación Internacional de Traductores y Redactores de Medicina y Ciencias Afines	Spanish,English,French,Portuguese	1537-1964		medical language,medical translation,medical writing	2000		2011-06-12T08:56:18Z	Philology. Linguistics,Language and Literature,Linguistics,Languages and Literatures	Spain	N	http://medtrad.org/index.html		Yes
2211-5242Z	Disability CBR & Inclusive Development	DCID : Disability, CBR and Inclusive Development	http://dcidj.org/	VU e-Publishing	English	2211-5242		disability studies,community based rehabilitation,developing countries	2011		2011-08-04T10:51:50Z	Social pathology. Social and public welfare. Criminology,Social Sciences,Social and Public Welfare,Sociology,Social Sciences	India	N	http://dcidj.org/about/submissions#authorGuidelines	by-nd	Yes
1690-4532Z1690-4524	Journal of Systemics Cybernetics and Informatics		http://www.iiisci.org/journal/sci/Home.asp	International Institute of Informatics and Cybernetics	English	1690-4532	1690-4524	systems philosophy,communication and control,interdisciplinary communication	2003		2011-07-16T11:32:16Z	Electronic computers. Computer science,Instruments and machines,Mathematics,Science,Computer Science,Technology and Engineering	United States	CON	http://www.iiisci.org/journal/sci/Information-Contributors.pdf?var=		Yes
2182-1097Z	CEM : Cultura Espaço & Memória		http://ler.letras.up.pt/site/default.aspx?qry=id04id1349&sum=sim	Universidade do Porto, CITCEM	Portuguese,English	2182-1097		history,culture	2010		2012-02-15T16:32:44Z	General Works,Multidisciplinary,General Works	Portugal	N			Yes
2238-3565Z	Revista Sapiência : Sociedade Sabres e Práticas Educacionais		http://www.revsapiencia.ipora.ueg.br/index.php/pris	Universidade Estadual de Goiás	Portuguese	2238-3565		education,humanities,language,natural science	2012		2013-04-18T20:29:48Z	General Works,Multidisciplinary,General Works	Brazil	N	http://www.revsapiencia.ipora.ueg.br/index.php/pris/about/submissions#authorGuidelines		Yes
2232-5107Z2232-5697	International Journal of Management Knowledge and Learning		http://www.ijmkl.si	International School for Social and Business Studies	English	2232-5107	2232-5697	social science,entrepreneurship,innovation,human capital,information systems	2012		2013-04-23T19:49:24Z	Education,Business,Commerce,Social Sciences,Business and Management,Business and Economics	Slovenia	N	http://www.mfdps.si/en/strani/1222	by-nc-nd	Yes
1851-1066Z1852-5970	Revista de Instituciones Ideas y Mercados	RIIM	http://www.eseade.edu.ar/riim/revista-riim/presentacion.html	Instituto Universitario ESEADE	Spanish,English	1851-1066	1852-5970	social sciences,economics,political theory,liberalism,free enterprise	2007		2012-06-04T12:05:29Z	Economic theory. Demography,Social Sciences,Economics,Business and Economics,Political theory,Political science,Political Science,Law and Political Science	Argentina	N	http://www.eseade.edu.ar/riim/revista-riim/pautas-para-colaboraciones.html		Yes
2031-7654Z2034-6395	Slavica Bruxellensia : Revue Polyphonique de Littérature Culture et Histoire Slaves		http://slavica.revues.org/	Université Libre de Bruxelles	French	2031-7654	2034-6395	Slavic studies,Slavic culture,Slavic literature,Slavic history	2008		2012-07-04T08:12:40Z	Slavic languages. Baltic languages. Albanian languages,Language and Literature,Languages and Literatures	Belgium	N	http://slavica.revues.org/456		Yes
1804-5804Z1804-9702	European Medical Health and Pharmaceutical Journal		http://health.journals.cz/	Central Bohemia University	English	1804-5804	1804-9702	health sciences,pharmaceutics,ecology	2011		2012-07-04T14:56:42Z	Medicine (General),Medicine,Medicine (General),Health Sciences	Czech Republic	Y	http://ojs.journals.cz/index.php/EMHPJ/about	by	Yes
2249-9504Z	International Journal of Pharmaceutical Chemical and Biological Sciences		http://www.ijpcbs.com/	International Journal of Pharmaceutical, Chemical and Biological Sciences	English	2249-9504		pharmaceutical sciences,chemical sciences,biological sciences	2011		2013-03-03T20:49:42Z	Science (General),Science,Science (General),Science General	India	Y			Yes
2285-5750Z	Scientific papers : Series D Animal Science		http://animalsciencejournal.usamv.ro/	University of Agronomic Sciences and Veterinary Medicine of Bucharest	English	2285-5750		genetics,nutrition,reproduction,wild life management,fishery	2012		2013-03-21T10:41:17Z	Animal culture,Agriculture,Animal Sciences,Agriculture and Food Sciences	Romania	N	http://agricultureforlife.usamv.ro/documents/2013/Instructions_for_Authors_2013.pdf		Yes
2067-4074Z	Journal of Mobile Embedded and Distributed Systems	JMEDS	http://www.jmeds.eu	Bucharest University of Economic Studies	English	2067-4074		distributed computing,embedded systems,mobile systems,data security	2009		2012-09-17T11:00:06Z	Electronic computers. Computer science,Instruments and machines,Mathematics,Science,Computer Science,Technology and Engineering	Romania	N	http://www.jmeds.eu/index.php/jmeds/about/submissions#authorGuidelines	by-sa	Yes
1793-8198Z	International Journal of Materials Mechanics and Manufacturing	IJMMM	http://www.ijmmm.org/	IACSIT Press	English	1793-8198		aerodynamics,applied mechanics,engineering materials,mechanical power engineering,mechatronics	2013		2013-06-12T18:45:15Z	Mechanical engineering and machinery,Technology,Mechanical Engineering,Technology and Engineering	Singapore	CON	http://www.ijmmm.org/		Yes
1688-7026Z	Psicología Conocimiento y Sociedad		http://revista.psico.edu.uy/index.php/revpsicologia/index	Universidad de la República	Spanish,English,Portuguese	1688-7026		social psychology,medical psychology,rehabilitation,social problems,social welfare	2010		2012-12-13T13:12:08Z	Psychology,Philosophy. Psychology. Religion,Psychology,Social Sciences	Uruguay	N	http://revista.psico.edu.uy/index.php/revpsicologia/about/submissions#authorGuidelines		Yes
0123-5931Z2256-5450	Literatura : Teoría Historia y Crítica		http://www.revistas.unal.edu.co/index.php/lthc	Universidad Nacional de Colombia	Spanish	0123-5931	2256-5450	literary theory,comparative literature,cultural studies	2004		2012-12-22T09:20:24Z	Literature (General),Language and Literature,Languages and Literatures	Colombia	N	http://www.revistas.unal.edu.co/index.php/lthc/about/submissions#onlineSubmissions	by	Yes
2224-0616Z	International Journal of Agricultural Research Innovation and Technology : IJARIT		http://www.ijarit.webs.com	IJARIT Research Foundation	English	2224-0616		soil science,environmental technology,food science,horticulture,agronomy	2011		2012-11-27T13:40:48Z	Agriculture (General),Agriculture,Agriculture (General),Agriculture and Food Sciences	Bangladesh	Y	http://ijarit.webs.com/papersubmission.htm	by	Yes
2301-3567Z	Journal of Economics Business and Management	JOEBM	http://www.joebm.com/	IACSIT Press	English	2301-3567		accounting,business ethics,finance,human resource,marketing	2013		2013-07-01T16:25:12Z	Business,Commerce,Social Sciences,Business and Management,Business and Economics	Singapore	CON	http://www.joebm.com/list-17-1.html		Yes
2193-7052Z	GMS : German Plastic Reconstructive and Aesthetic Surgery – Burn and Hand Surgery		http://www.egms.de/dynamic/en/journals/gpras/	German Medical Science GMS Publishing House	English	2193-7052		healing disorders,transplatation	2011		2013-07-02T17:53:19Z	Surgery,Medicine,Surgery,Medicine (General),Health Sciences	Germany	N	http://www.egms.de/static/en/journals/gpras/authors.htm		Yes
1846-8527Z1846-9213	Libellarium : Journal for the History of Writing Books and Memory Institutions	Zadar : Sveučilište u Zadru, Odjel za Knjižničarstvo	http://ozk.unizd.hr/libellarium	University of Zadar	Croatian	1846-8527	1846-9213	history of writing,history of books,information science,library science,museum studies	2008		2013-10-28T21:10:15Z	Bibliography. Library science. Information resources,Library and Information Science,Social Sciences	Croatia	N	http://ozk.unizd.hr/libellarium/index.php/libellarium/about/submissions#authorGuidelines	by-nc-nd	Yes
2202-7998Z2202-8005	International Journal for Crime Justice and Social Democracy		https://www.crimejusticejournal.com/	Queensland Uuniversity of Technology	English	2202-7998	2202-8005	penology,human rights,green criminology,critical criminology,feminist criminology	2012		2013-11-05T15:26:13Z	Social pathology. Social and public welfare. Criminology,Social Sciences,Social and Public Welfare,Sociology,Social Sciences	Australia	N	https://www.crimejusticejournal.com/about/submissions	by	Yes
0719-2991Z	Current Opinion in Creativity Innovation and Entrepreneurship		http://www.cuocient.com/index.php/cl	Chimera Innova Group	English	0719-2991		innovation management,technology management	2012		2013-11-06T13:31:34Z	General Works,Multidisciplinary,General Works	Chile	N	http://www.cuocient.com/index.php/cl/about/submissions#authorGuidelines	by	Yes
1998-5452Z	HYDRO Nepal : Journal of Water Energy and Environment		http://www.nepjol.info/index.php/HN/index	Environmental Resourcs Group (P) Ltd.	English	1998-5452		hydropower,environmental issues,electric power	2008		2013-11-20T14:42:44Z	Electrical engineering. Electronics. Nuclear engineering,Technology,Electrical and Nuclear Engineering,Technology and Engineering	Nepal	N	http://www.nepjol.info/index.php/HN/about/submissions#authorGuidelines	by-nc-nd	Yes
1472-6815Z	BMC Ear Nose and Throat Disorders		http://www.biomedcentral.com/bmcearnosethroatdisord/	BioMed Central	English	1472-6815		otorhinolaryngology,medicine	2001		2003-06-23T00:00:00Z	Otorhinolaryngology,Medicine,Otorhinolaryngology,Medicine (General),Health Sciences	United Kingdom	Y	http://www.biomedcentral.com/bmcearnosethroatdisord/about#apc	by	Yes
1532-0073Z1532-0081	Homology Homotopy and Applications (HHA)		http://www.intlpress.com/HHA/	International Press of Boston, Inc.	English	1532-0073	1532-0081	algebra,topology,mathematics	1999		2003-11-17T00:00:00Z	Mathematics,Science,Mathematics,Mathematics and Statistics	United States	N	http://www.intlpress.com/HHA/authinfo.htm		Yes
0023-9186Z	Law and Contemporary Problems : a Quarterly Published by the Duke University School of Law		http://www.law.duke.edu/journals/lcp/	Duke University School of Law	English	0023-9186		law	1996		2003-09-19T00:00:00Z	Law in general. Comparative and uniform law. Jurisprudence,Law,Law,Law and Political Science	United States	NY	http://www.law.duke.edu/journals/lcp/submit		Yes
1467-0437Z	Law Social Justice & Global Development	LGD	http://www2.warwick.ac.uk/fac/soc/law/elj/lgd/	University of Warwick	English	1467-0437		social justice,law,human rights	2000		2004-01-07T00:00:00Z	Law in general. Comparative and uniform law. Jurisprudence,Law,Law,Law and Political Science	United Kingdom	NY	http://www2.warwick.ac.uk/fac/soc/law/elj/lgd/submission/		Yes
1470-9120Z	Body Space and Technology	BST	http://people.brunel.ac.uk/bst/home.htm	Brunel University	English	1470-9120		contemporary art,performance practice	2000		2005-04-07T11:34:17Z	Arts in general,Fine Arts,Arts in general,Arts and Architecture	United Kingdom	N	http://people.brunel.ac.uk/bst/vol0701/home.html		Yes
1993-6818Z	Magazin erwachsenenbildung.at : Das Fachmedium für Forschung Praxis und Diskurs		http://www.erwachsenenbildung.at/magazin	Bundesminsterium für Unterricht, Kunst und Kultur, Bundesinstitut für Erwachsenenbildung	German	1993-6818		adult education	2007		2007-08-06T16:55:23Z	Special aspects of education,Education,Education,Social Sciences	Austria	Y	http://erwachsenenbildung.at/addon/impressum.php		Yes
1833-4318Z	Journal of Business Systems Governance and Ethics		http://www.jbsge.vu.edu.au/	Victoria University	English	1833-4318		business information systems,business ethics,business governance,economics	2006		2007-08-30T09:38:35Z	Business,Commerce,Social Sciences,Business and Management,Business and Economics	Australia	N	http://www.jbsge.vu.edu.au/		Yes
1177-2484Z	Journal of Men Masculinities and Spirituality	JMMS	http://www.jmmsweb.org	Journal of Men, Masculinities and Spirituality	English	1177-2484		gender,theology	2007		2007-04-16T15:04:11Z	Religion (General),Religions. Mythology. Rationalism,Philosophy. Psychology. Religion,Religion,Philosophy and Religion,Men,The family. Marriage. Woman,Social Sciences,Gender Studies,Social Sciences	New Zealand	N	http://www.jmmsweb.org/submissions		Yes
1886-4805Z	ACE : Architecture City and Environment		http://upcommons.upc.edu/revistes/handle/2099/1822	Universitat Politècnica de Catalunya	English,Catalan,Spanish	1886-4805		architecture,cities,environment	2006		2006-12-13T14:34:24Z	Architecture,Fine Arts,Architecture,Arts and Architecture	Spain	N			Yes
1699-437XZ	Papeles de Trabajo sobre Cultura Educación y Desarrollo Humano	Working Papers on Culture, Education and Human Development	http://www.uam.es/ptcedh	Universidad Autónoma de Madrid	Spanish,Catalan,Galician,Portuguese,English	1699-437X		educational practice,sociocultural theory	2005		2005-11-30T09:28:07Z	Psychology,Philosophy. Psychology. Religion,Psychology,Social Sciences,Theory and practice of education,Education,Education,Social Sciences	Spain	N	http://www.uam.es/otros/ptcedh/paginas_iniciales/msubmission.htm		Yes
0037-4474Z	Sibirskij Matematičeskij Žurnal : Akademija Nauk SSSR Sibirskoe Otdelenie	Siberian Mathematical Journal	http://www.math.nsc.ru/smz/index.htm	Sobolev Institute of Mathematics	Russian	0037-4474		mathematics,applied mathematics	2000		2005-12-13T14:50:11Z	Mathematics,Science,Mathematics,Mathematics and Statistics	Russia	N	http://www.math.nsc.ru/smz/articles.htm		Yes
1746-5893Z	Law Environment and Development Journal	LEAD	http://www.lead-journal.org/	School of Oriental and African Studies	English,French	1746-5893		environmental law,law and development	2005		2006-02-03T13:52:17Z	Law in general. Comparative and uniform law. Jurisprudence,Law,Law,Law and Political Science	India	N	http://www.lead-journal.org/submissions.htm		Yes
1652-8719Z	Systems Signs & Actions		http://www.sysiac.org	Lingköping University, Aarhus University	English	1652-8719		action,communication,representation,information technology,work organizations	2005		2005-10-13T13:13:55Z	Communication. Mass media,Philology. Linguistics,Language and Literature,Media and communication,Social Sciences,Information technology,Industrial engineering. Management engineering,Technology (General),Technology,Computer Science,Technology and Engineering	Sweden	NY	http://www.sysiac.org/?pageId=6		Yes
1347-1767Z1347-3824	Journal of Computer Chemistry Japan		http://www.jstage.jst.go.jp/browse/jccj	Society of Computer Chemistry	Japanese,English	1347-1767	1347-3824	chemistry,data processing	2002		2005-10-21T15:48:03Z	Chemistry,Science,Chemistry (General),Chemistry	Japan	Y	http://mc.manuscriptcentral.com/societyimages/jccj/JCCJ_Instructions_to_Authors_en_20110722d.pdf		Yes
1473-8031Z1473-804X	International Journal of Simulation : Systems Science and Technology	IJSSST	http://ijssst.info	UK Simulation Society	English	1473-8031	1473-804X	modelling,simulation,systems engineering	2000		2005-11-03T16:43:53Z	Electronic computers. Computer science,Instruments and machines,Mathematics,Science,Computer Science,Technology and Engineering	United Kingdom	N			Yes
1699-3748Z	Didáctica Innovación y Multimedia : DIM		http://ddd.uab.cat/record/7423	Universitat Autònoma de Barcelona	Spanish	1699-3748		e-learning,audiovisual learning,pedagogy	2005		2008-10-31T10:35:22Z	Special aspects of education,Education,Education,Social Sciences	Spain	N	http://dim.pangea.org/revistaDIM16/revistanewnormaspublicacion.htm		Yes
1179-1357Z	Clinical Cosmetic and Investigational Dentistry		http://www.dovepress.com/clinical-cosmetic-and-investigational-dentistry-journal	Dove Medical Press	English	1179-1357		cosmetic interventions,dental materials,techniques,orthodontics	2009		2009-07-14T12:57:54Z	Dentistry,Medicine,Dentistry,Health Sciences	United Kingdom	Y	http://www.dovepress.com/journal_pricing_bands.php?journal_id=54		Yes
1697-5928Z	Llengua Societat i Comunicació : Revista de Sociolingüística de la Universitat de Barcelona	LSC	http://www.raco.cat/index.php/LSC	Universitat de Barcelona	Catalan,Spanish	1697-5928		sociolinguistics,languages,communication	2004		2009-09-07T16:20:05Z	Philology. Linguistics,Language and Literature,Linguistics,Languages and Literatures	Spain	N	http://www.ub.edu./cusc/lsc/lsc_actual.htm		Yes
1981-6278Z	RECIIS : Electronic Journal of Communication Information & Innovation in Health		http://www.reciis.cict.fiocruz.br/index.php/reciis	Institute of Communication and Scientific and Technological Information in Health	Portuguese,English	1981-6278		communication,information,innovation,health	2007		2009-10-16T13:56:51Z	Communication. Mass media,Philology. Linguistics,Language and Literature,Media and communication,Social Sciences,Medicine (General),Medicine,Medicine (General),Health Sciences	Brazil	N	http://www.reciis.cict.fiocruz.br/index.php/reciis/about/submissions#authorGuidelines		Yes
1407-009XZ	Proceedings of the Latvian Academy of Sciences. Section B : Natural Exact and Applied Sciences		http://www.degruyter.com/view/j/prolas	Versita	English	1407-009X		environmental science,mathematics,biology,geology,medicine	2008		2008-12-18T10:54:04Z	Science (General),Science,Science (General),Science General	Latvia	N	http://www.degruyter.com/view/supplement/s1407009X_Instructions_to_Authors.pdf		Yes
1897-8649Z2080-2145	Journal of Automation Mobile Robotics & Intelligent Systems	JAMRIS	http://www.jamris.org/index.php	PIAP – Industrial Research Institute for Automation and Measurements	English	1897-8649	2080-2145	applied automatics,mobile robots control,distributed systems,navigation,data transmission	2007		2009-04-15T11:19:16Z	Industrial engineering. Management engineering,Technology (General),Technology,Industrial Engineering,Technology and Engineering	Poland	N	http://www.jamris.org/authors.php		Yes
2012-7081Z	Sri Lanka Journal of Forensic Medicine Science & Law		http://www.sljol.info/index.php/SLJFMSL/index	University of Peradeniya	English	2012-7081		forensic sciences,medical jurisprudence,forensic pathology	2010		2011-01-25T12:30:22Z	Pathology,Medicine,Pathology,Medicine (General),Health Sciences	Sri Lanka	N	http://www.sljol.info/index.php/SLJFMSL/about/submissions#authorGuidelines		Yes
1963-1723Z	Discours : Revue de Linguistique Psycholinguistique et Informatique		http://discours.revues.org/	Université Paris Sorbonne-Paris IV	French,English	1963-1723		linguistics,psycholinguistics,computational linguistics,literature,language,discourse analysis	2007		2010-11-18T10:24:15Z	Philology. Linguistics,Language and Literature,Linguistics,Languages and Literatures	France	N	http://discours.revues.org/index207.html		Yes
1988-7116Z	Revista Globalización Competitividad y Gobernabilidad	Journal of Globalization, Competitiveness and Governability	http://gcg.universia.net/	Georgetown University	Spanish,English,Portuguese	1988-7116		economics,business,law,competitiveness,Latin America	2007		2010-06-04T11:16:04Z	Commerce,Social Sciences,Business and Management,Business and Economics	Spain	N	http://gcg.universia.net/instrucciones.jsp		Yes
0354-2726Z	Aktuelnosti iz Neurologije Psihijatrije i Graničnih Područja	Current Topics in Neurology, Psychiatry and Related Disciplines	http://www.aktuelnosti.org	Clinical Center of Vojvodina	English,Serbian	0354-2726		neuroscience,neurology,psychiatry,psychology	2002		2010-07-26T11:14:37Z	Neurology. Diseases of the nervous system,Neurosciences. Biological psychiatry. Neuropsychiatry,Internal medicine,Medicine,Neurology,Medicine (General),Health Sciences	Serbia	N	http://www.aktuelnosti.org/index.php/instructions-for-authors		Yes
0354-4656Z	Facta Universitatis Series : Physics Chemistry and Technology		http://www.doiserbia.nb.rs/journal.aspx?issn=0354-4656	University of Niš	English	0354-4656		chemical sciences,engineering sciences	2002		2010-09-28T16:21:57Z	Science (General),Science,Science (General),Science General	Serbia	N	http://www.doiserbia.nb.rs/journal.aspx?issn=0354-4656		Yes
1224-4899Z2067-242X	Buletinul Universitatii Petrol Gaze din Ploiesti Seria Matematica-Informatica-Fizica	Bulletin of PG University of Ploiesti, Series Mathematics, Informatics	http://bulletin-mif.unde.ro/?p=home	Petroleum-Gas University of Ploieşti	English,French,German	1224-4899	2067-242X	mathematics,informatics,physics,computer science	2006		2009-12-03T17:18:33Z	Science (General),Science,Science (General),Science General	Romania	N	http://bmif.unde.ro/?p=submit&s=guides		Yes
1852-8759Z	Revista Latinoamericana de Estudios Sobre Cuerpos Emociones y Sociedad (RELACES)		http://www.relaces.com.ar	CEA Unidad Ejecutora CONICET-UNC (20730)	Spanish,Portuguese	1852-8759		social studies,cultural studies,body,emotions,Latin America,sociology,ethnology	2009		2010-01-21T14:04:56Z	General Works,Multidisciplinary,General Works	Argentina	N	http://www.relaces.com.ar/index.php/relaces/about/submissions#authorGuidelines	by	Yes
0006-2294Z2213-4379	Bijdragen tot de Taal- Land- en Volkenkunde	Journal of the Humanities and Social Sciences of Southeast Asia and Oceania	http://www.kitlv-journals.nl/index.php/btlv	Brill	English,Dutch	0006-2294	2213-4379	linguistics,ethnology,history of Indonesia,history of Southeast Asia,languages and literature of Eastern Asia	1949		2011-02-14T15:37:48Z	General Works,Multidisciplinary,General Works	Netherlands	N	http://www.brill.com/sites/default/files/ftp/authors_instructions/BKI.pdf	by-nc-nd	Yes
1692-715XZ2027-7679	Revista Latinoamericana en Ciencias Sociales Niñez y Juventud		http://revistaumanizales.cinde.org.co/index.php/Revista-Latinoamericana	Universidad de Manizales	Spanish	1692-715X	2027-7679	children,adolescents,child welfare	2003		2010-09-01T16:10:39Z	Social sciences (General),Social Sciences,Social Sciences	Colombia	N	http://revistalatinoamericanaumanizales.cinde.org.co/	by-nc-nd	Yes
1920-7298Z	International Journal of Child Youth & Family Studies	IJCYFS : International Journal of Child, Youth and Family Studies	http://journals.uvic.ca/index.php/ijcyfs	University of Victoria	English	1920-7298		children,adolescents,family studies,community	2010		2010-09-06T12:43:33Z	Sociology (General),Social Sciences,Sociology,Social Sciences	Canada	N	http://journals.uvic.ca/index.php/ijcyfs/about/submissions#authorGuidelines		Yes
1450-5339Z	Journal of Mining and Metallurgy Section B : Metallurgy		http://www.doiserbia.nb.rs/journal.aspx?issn=1450-5339	Technical Faculty, Bor	English	1450-5339		materials,chemical technology,engineering sciences	2002		2010-09-28T15:41:35Z	Mining engineering. Metallurgy,Technology,Mining and Metallurgy,Technology and Engineering	Serbia	N	http://www.doiserbia.nb.rs/journal.aspx?issn=1450-5339		Yes
2066-7671Z2067-6360	Extreme Life Biospeology & Astrobiology	ELBA Bioflux	http://www.elba.bioflux.com.ro/	Bioflux Society	English	2066-7671	2067-6360	extremophilic species,cave,extreme environment	2009		2010-02-05T11:31:11Z	Animal culture,Agriculture,Animal Sciences,Agriculture and Food Sciences	Romania	Y	http://www.elba.bioflux.com.ro/		Yes
2040-7459Z2040-7467	Research Journal of Applied Sciences Engineering and Technology		http://www.maxwellsci.com/jp/j2p.php?jid=RJASET	Maxwell Science Publication	English	2040-7459	2040-7467	agricultural engineering,biotechnology,civil engineering,food science and technology,electrical engineering,production engineering,mechanical engineering,physics	2009		2010-02-09T13:54:50Z	Engineering (General). Civil engineering (General),Technology,General and Civil Engineering,Technology and Engineering,Technology (General),Technology,Technology (General),Technology and Engineering	United Kingdom	Y	http://www.maxwellsci.com/guaid.php		Yes
2104-3736Z	Genre Sexualité et Société		http://gss.revues.org/	Genre, Sexualité et Société	French	2104-3736		gender,sexuality,feminist studies,queer studies	2009		2010-02-23T11:50:30Z	Women. Feminism,The family. Marriage. Woman,Social Sciences,Gender Studies,Social Sciences	France	N	http://gss.revues.org/index747.html		Yes
1844-6051Z	Constantin Brancusi University's Annals Letters and Social Sciences Serie	Analele Universităţii	http://www.utgjiu.ro/revista/?lang=en	Academica Brancusi Publisher	Romanian,French,English	1844-6051		teaching,language	2007		2010-02-23T11:11:37Z	Social sciences (General),Social Sciences,Social Sciences,Education (General),Education,Education,Social Sciences	Romania	N	http://www.utgjiu.ro/revista/?page=autori		Yes
1214-1178Z1805-9368	Plant Soil and Environment	PSE	http://www.agriculturejournals.cz/web/pse.htm	Czech Academy of Agricultural Sciences	English	1214-1178	1805-9368	agriculture,agronomy,sustainable agriculture,soil science,plant development,plant culture	2002		2010-05-25T15:53:47Z	Agriculture (General),Agriculture,Agriculture (General),Agriculture and Food Sciences	Czech Republic	N	http://www.agriculturejournals.cz/web/pdf/pse_author_instr.pdf		Yes
1856-9528Z	Salud Arte y Cuidado		http://bibmed.ucla.edu.ve/sac/	Universidad Centroccidental Lisandro Alvarado	Spanish	1856-9528		nursing,health sciences	2008		2012-05-31T10:15:17Z	Public aspects of medicine,Medicine,Public Health,Health Sciences	Venezuela	N	http://bibmed.ucla.edu.ve/sac/InformaciónAutores.pdf	by-nc-nd	Yes
2077-1886Z	Journal of Economics Finance and Administrative Science		http://www.scielo.org.pe/scielo.php/script_sci_serial/lng_en/pid_2077-1886/nrm_iso	Universidad ESAN	English,Spanish	2077-1886		economics,finance,accounting,risk management	2010		2012-06-04T11:57:31Z	Economic growth, development, planning,Industries. Land use. Labor,Social Sciences,Economics,Business and Economics	Peru	N	http://www.scielo.org.pe/revistas/jefas/iinstruc.htm		Yes
2171-2085Z1989-709X	Psychology Society & Education	Psychology, Society and Education	http://www.psye.org/en/index.php	Association for the Advancement of Psychology and Education (AAPE)	Spanish,English	2171-2085	1989-709X	psychology,sociology,education	2009		2012-07-03T15:12:37Z	Psychology,Philosophy. Psychology. Religion,Psychology,Social Sciences	Spain	N	http://www.psye.org/en/instrucciones.php		Yes
2045-3345Z2047-7848	Research Journal of Economics Business and ICT		http://www.researchjournals.co.uk/	English Time Schools & Overseas Education	English	2045-3345	2047-7848	communication technology,social conditions	2011		2012-07-04T15:51:36Z	Economic theory. Demography,Social Sciences,Economics,Business and Economics	United Kingdom	Y	http://ojs.journals.cz/index.php/RJEBI/about/editorialPolicies#custom-0	by	Yes
1971-8543Z	Stato Chiese e Pluralismo Confessionale		http://riviste.unimi.it/index.php/statoechiese	Università degli Studi di Milano	Italian	1971-8543		canon law,freedom of religion,the church,religious pluralism	2007		2011-09-22T16:57:36Z	Religion (General),Religions. Mythology. Rationalism,Philosophy. Psychology. Religion,Religion,Philosophy and Religion	Italy	N	http://riviste.unimi.it/index.php/statoechiese/about/submissions#authorGuidelines		Yes
2180-3536Z2180-3706	International Journal of Electronics Computer and Communications Technologies	IJECCT	http://ijecct.coe.edu.my	Universiti Tenaga Nasional	English	2180-3536	2180-3706	electronics,computer engineering,communication technology	2010		2011-09-29T16:15:11Z	Electrical engineering. Electronics. Nuclear engineering,Technology,Electrical and Nuclear Engineering,Technology and Engineering,Electronic computers. Computer science,Instruments and machines,Mathematics,Science,Computer Science,Technology and Engineering	Malaysia	N	http://ijecct.coe.edu.my/journal/index.php/ijecct/about/submissions#authorGuidelines		Yes
2108-6796Z	Afriques : Débats Méthodes et Terrains d'Histoire		http://afriques.revues.org/	Centre d’Études des Mondes Africains	French,German,English	2108-6796		history of Africa	2010		2012-04-11T10:22:59Z	History of Africa,History (General) and history of Europe,History,History and Archaeology	France	N	http://afriques.revues.org/558?lang=fr		Yes
1645-3298Z	Gymnasium : Revista de Educação Física Desporto e Saúde		http://revistas.ulusofona.pt/index.php/gymnasium/index	Universidade Lusófona de Humanidades e Tecnologias (ULHT)	Portuguese,Spanish	1645-3298		sports science,physical education	2010		2012-05-03T13:24:30Z	Sports,Recreation. Leisure,Geography. Anthropology. Recreation,Sports Science,Social Sciences	Portugal	N	http://revistas.ulusofona.pt/index.php/gymnasium/about/submissions#authorGuidelines	by-nc-nd	Yes
0718-5391Z0719-0107	Revista Clínica de Periodoncia Implantología y Rehabilitación Oral	PIRO	http://www.scielo.cl/scielo.php?script=sci_serial&pid=0719-0107&lng=en&nrm=iso	Sociedad de Periodoncia de Chile, Sociedad de Implantología Oral de Chile and Sociedad de Prótesis y Rehabilitación Oral de Chile	Spanish,English	0718-5391	0719-0107	periodontics,osseointegration,oral surgical procedures	2010		2012-05-15T14:17:45Z	Dentistry,Medicine,Dentistry,Health Sciences	Chile	N	http://www.scielo.cl/revistas/piro/iinstruc.htm		Yes
1838-7845Z	Journal of Project Program & Portfolio Management	PPPM : Journal of Project, Program and Portfolio Management	http://epress.lib.uts.edu.au/ojs/index.php/pppm/index	UTSePress	English	1838-7845		project management	2010		2011-05-23T11:10:08Z	Management. Industrial management,Industries. Land use. Labor,Social Sciences,Business and Management,Business and Economics	Australia	N	http://epress.lib.uts.edu.au/ojs/index.php/pppm/about/submissions#authorGuidelines	by	Yes
2035-0031Z	Dialogues in Philosophy Mental and Neuro Sciences	Dialogues in Philosophy, Mental & Neuro Sciences	http://www.crossingdialogues.com/journal.htm	Crossing Dialogues Association	English	2035-0031		philosophy of psychopathology,neurology,psychology	2008		2011-04-18T09:41:24Z	Philosophy (General),Philosophy. Psychology. Religion,Philosophy,Philosophy and Religion,Psychiatry,Neurology. Diseases of the nervous system,Neurosciences. Biological psychiatry. Neuropsychiatry,Internal medicine,Medicine,Psychiatry,Medicine (General),Health Sciences	Italy	Y	http://www.crossingdialogues.com/guidelines.htm		Yes
1846-2197Z	LAHOR : Časopis za Hrvatski kao Materinski Drugi i Strani Jezik		http://hrcak.srce.hr/lahor	HFD (Croatian Philological Society)	Croatian,English	1846-2197		the Croatian language,Croatian as L1,Croatian as L2,linguistics,psycholinguistics,sociolinguistics	2006		2011-07-28T09:34:33Z	Slavic languages. Baltic languages. Albanian languages,Language and Literature,Languages and Literatures	Croatia	N	http://hrcak.srce.hr/upute/guide_authors_LAHOR_journal_for_Croatian_as_mother_second_and_foreign_lanugage.pdf		Yes
2089-4848Z	International Journal of Nano Devices Sensors and Systems	IJ-Nano	http://www.iaesjournal.com/online/index.php/IJ-Nano	Institute of Advanced Engineering and Science	English	2089-4848		nanocircuits,nanosystems,analogue circuit design,digital circuit design,VLSI technology	2012		2013-03-31T19:25:34Z	Technology (General),Technology,Technology (General),Technology and Engineering	Indonesia	CON	http://www.iaesjournal.com/online/index.php/IJ-Nano/about/submissions#authorFees	by-nc	Yes
2277-9477Z	International Journal of Electronics Communication and Soft Computing Science and Engineering	IJECSCSE	http://www.ijecscse.org	IJECSCSE	English	2277-9477		computer science,information technology,electrical engineering,telecommunication,mechanical engineering	2012		2013-05-10T17:45:41Z	General Works,Multidisciplinary,General Works	India	Y	http://www.ijecscse.org/?page_id=30		Yes
2010-3638Z	International Journal of Bioscience Biochemistry and Bioinformatics	IJBBB	http://www.ijbbb.org/	IACSIT Press	English	2010-3638		bioscience engineering,biomedicine engineering,molecular biology of plants	2011		2013-05-20T21:34:05Z	General Works,Multidisciplinary,General Works	Singapore	CON	http://www.ijbbb.org/list-17-1.html		Yes
2278-8921Z	Oncology Gastroenterology and Hepatology Reports		http://www.oghreports.org	EManuscript Services	English	2278-8921		endoscopy,pathology,hepatitis,hepatic oncology,obesity	2012		2013-05-24T19:01:13Z	Medicine (General),Medicine,Medicine (General),Health Sciences	India	N	http://www.oghreports.org/instruction-authors	by-nc-nd	Yes
2325-095XZ	Journal of Dental Oral and Craniofacial Epidemiology		http://www.sharmilachatterjee.com/ojs-2.3.8/index.php/JDOCE	SCASI	English	2325-095X		aging,cancer,chronic disease,clinical epidemiology,disease pathogenesis	2013		2013-05-27T21:11:43Z	Medicine (General),Medicine,Medicine (General),Health Sciences	United States	N	http://www.sharmilachatterjee.com/ojs-2.3.8/index.php/JDOCE/about/submissions#authorGuidelines	by-nc-nd	Yes
2052-8396Z	Space and Culture India		http://www.spaceandculture.in	ACCB Publishing	English	2052-8396		social change in India,gender discrimination,ethnic discrimination,corruption	2013		2013-05-28T17:42:32Z	Social sciences (General),Social Sciences,Social Sciences	United Kingdom	CON	http://www.spaceandculture.in/index.php/spaceandculture/about/submissions#authorFees	by-nc-nd	Yes
2010-023XZ	International Journal of Trade Economics and Finance	IJTEF	http://www.ijtef.org/	IACSIT Press	English	2010-023X		banking,insurance,commodities markets,management,emerging economies	2010		2013-05-29T13:50:21Z	Business,Commerce,Social Sciences,Business and Management,Business and Economics,Finance,Social Sciences,Business and Management,Business and Economics	Singapore	CON	http://www.ijtef.org/list-17-1.html		Yes
2321-3264Z	International Journal of Research in Management Science & Technology		http://www.ijrmst.org	Prannath Parnami Institute of Management & Technology, Hisar	English	2321-3264		computer science,engineering,earth sciences	2013		2013-05-29T16:57:24Z	General Works,Multidisciplinary,General Works	India	N	http://www.ijrmst.org/guidlines.php		Yes
1696-5043Z1989-7413	Cultura Ciencia y Deporte		http://www.redalyc.org/revista.oa?id=1630	Universidad Católica San Antonio de Murcia	Spanish,English	1696-5043	1989-7413	culture,education,health	2005		2013-06-05T17:24:02Z	Sports,Recreation. Leisure,Geography. Anthropology. Recreation,Sports Science,Social Sciences	Spain	CON	http://www.redalyc.org/revista.oa?id=1993		Yes
2319-8753Z	International Journal of Innovative Research in Science Engineering and Technology		http://www.ijirset.com	S&S Publications	English	2319-8753		science,engineering,technology	2012		2013-06-07T20:27:45Z	Science (General),Science,Science (General),Science General	India	Y	http://www.ijirset.com/authors/publication-fee.html		Yes
1999-7086Z1999-7094	Journal of Emergency Medicine Trauma and Acute Care		http://www.qscience.com/loi/jemtac/	Bloomsbury Qatar Foundation Journals	English	1999-7086	1999-7094	emergency medicine,trauma,acute care	2012		2013-06-13T19:52:52Z	Medical emergencies. Critical care. Intensive care. First aid,Internal medicine,Medicine,Internal medicine,Medicine (General),Health Sciences	Qatar	N	http://www.qscience.com/page/jemtac/ji_jemtac	by	Yes
2304-1366Z	International Journal of Management Economics and Social Sciences (IJMESS)		http://www.ijmess.com	Ijmess Int'l Publishers	English	2304-1366		business strategies,marketing management,economic analysis,social welfare	2012		2013-02-27T20:04:06Z	General Works,Multidisciplinary,General Works	United States	CON	http://www.ijmess.com/instructions.php	by-nc	Yes
2007-2023Z	Archivos de Criminología Criminalística y Seguridad Privada		http://www.somecrimnl.es.tl/	Sociedad Mexicana de Criminología capítulo Nuevo León	Spanish,English	2007-2023		criminology,crime,psychology,criminal law,comparative law	2009		2012-07-26T08:08:25Z	Psychology,Philosophy. Psychology. Religion,Psychology,Social Sciences,Criminal law and procedure,Comparative law. International uniform law,Law in general. Comparative and uniform law. Jurisprudence,Law,Law,Law and Political Science	Mexico	N	http://www.somecrimnl.es.tl	by-nc-sa	Yes
2011-9348Z	Memorias de la Conferencia Interna en Medicina y Aprovechamiento de Fauna Silvestre Exótica y no Convencional		http://veterinariosvs.org/pub/index.php/cima/	Asociacion de Veterinarios de Vida Silvestre	Spanish	2011-9348		wildlife management,wildlife conservation,zoology	2006		2012-08-21T13:03:42Z	Animal culture,Agriculture,Animal Sciences,Agriculture and Food Sciences	Colombia	N	http://www.veterinariosvs.org/editorial	by-nc-sa	Yes
0351-2274Z	Theoria Beograd		http://www.doiserbia.nb.rs/journal.aspx?issn=0351-2274	Serbian Philosophical Society, Belgrade	Serbian	0351-2274		philosophical sciences,logic	2007		2012-12-21T17:13:26Z	Philosophy (General),Philosophy. Psychology. Religion,Philosophy,Philosophy and Religion	Serbia	N	http://www.doiserbia.nb.rs/journal.aspx?issn=0351-2274		Yes
2164-2745Z2164-2753	Journal of Analytical Sciences Methods and Instrumentation		http://www.scirp.org/journal/JASMI/	Scientific Research Publishing	English	2164-2745	2164-2753	measurement science,experimental methods,thermal analysis	2011		2012-10-03T16:41:03Z	Science (General),Science,Science (General),Science General	United States	Y	http://www.scirp.org/Journal/ForAuthors.aspx?JournalID=525	by	Yes
2072-9502Z2224-9761	Vestnik Astrahanskogo Gosudarstvennogo Tehničeskogo Universiteta. Seriâ: Upravlenie Vyčislitelʹnaâ Tehnika i Informatika	Vestnik of Astrakhan State Technical University. Series: Management, Computer Science and Informatics	http://astu.org/Pages/Show/578-Zhurnal-Vestnik-AGTU-Seriya-Upravlenie-vichisliteljnaya-tehnika-i-informatika	Astrakhan State Technical University	Russian,English	2072-9502	2224-9761	management,computer software,computing equipment,telecommunication systems	2009		2012-10-06T19:30:40Z	Electronic computers. Computer science,Instruments and machines,Mathematics,Science,Computer Science,Technology and Engineering	Russia	CON	http://astu.org/Pages/Show/578-Zhurnal-Vestnik-AGTU-Seriya-Upravlenie-vichisliteljnaya-tehnika-i-informatika		Yes
2251-6387Z2251-824X	International Journal of Forest Soil and Erosion		http://www.ijfse.com/index.php/IJFSE	GHB's Journals	English	2251-6387	2251-824X	natural sciences,forest,soil sciences	2011		2012-10-08T15:19:18Z	Forestry,Agriculture,Forestry,Agriculture and Food Sciences	Iran	Y	http://www.ijfse.com/index.php/IJFSE/about/submissions#authorFees		Yes
2254-8319Z	ArDIn : Arte Diseño e Ingeniería		http://polired.upm.es/index.php/ardin	Universidad Politecnica de Madrid	Spanish	2254-8319		art,engineering,design,human development	2012		2013-06-18T16:35:31Z	General Works,Multidisciplinary,General Works	Spain	N	http://polired.upm.es/index.php/ardin/about/submissions#authorGuidelines		Yes
2226-7522Z2305-3372	Science Technology and Arts Research Journal		http://www.starjournal.org/	Wollega University	English	2226-7522	2305-3372	innovations,agriculture,pharmaceuticals,language	2012		2013-06-19T13:12:35Z	General Works,Multidisciplinary,General Works	Ethiopia	N	http://www.starjournal.org/ita.html		Yes
1471-2121Z	BMC Cell Biology		http://www.biomedcentral.com/bmccellbiol/	BioMed Central	English	1471-2121		cell biology,biology	2000		2003-04-03T00:00:00Z	Biology (General),Science,Biology,Biology and Life Sciences	United Kingdom	Y	http://www.biomedcentral.com/bmccellbiol/about#apc	by	Yes
1011-7571Z1423-0151	Medical Principles and Practice		http://www.karger.com/mpp	Karger	English	1011-7571	1423-0151	clinical and imaging sciences,surgery,dentistry,pharmacology,toxicology	1998		2002-05-01T20:13:31Z	Medicine (General),Medicine,Medicine (General),Health Sciences	Kuwait	Y	http://www.karger.com/Journal/Guidelines/224259	by-nc	Yes
1015-8987Z1421-9778	Cellular Physiology and Biochemistry		http://www.karger.com/cpb	Karger	English	1015-8987	1421-9778	cancer,molecular biology,pathophysiology,cellular metabolism,cell growth	2013		2002-05-01T20:13:31Z	Cytology,Biology (General),Science,Cytology,Biology,Biology and Life Sciences,Biochemistry,Organic chemistry,Chemistry,Science,Biochemistry,Life Sciences,Biology and Life Sciences	Switzerland	Y	http://www.karger.com/Journal/Guidelines/224332#10	by-nc	Yes
1471-2458Z	BMC Public Health		http://www.biomedcentral.com/bmcpublichealth/	BioMed Central	English	1471-2458		public health,medicine	2001		2003-04-03T00:00:00Z	Public aspects of medicine,Medicine,Public Health,Health Sciences	United Kingdom	Y	http://www.biomedcentral.com/bmcpublichealth/about#apc	by	Yes
1472-684XZ	BMC Palliative Care		http://www.biomedcentral.com/bmcpalliatcare/	BioMed Central	English	1472-684X		palliative care,medicine	2002		2003-04-03T00:00:00Z	Medicine (General),Medicine,Medicine (General),Health Sciences	United Kingdom	Y	http://www.biomedcentral.com/bmcpalliatcare/about#apc	by	Yes
1475-2867Z	Cancer Cell International		http://www.cancerci.com/	BioMed Central	English	1475-2867		medicine,cancer,oncology	2001		2003-05-08T00:00:00Z	Neoplasms. Tumors. Oncology. Including cancer and carcinogens,Internal medicine,Medicine,Oncology,Medicine (General),Health Sciences	United Kingdom	Y	http://www.cancerci.com/about#apc	by	Yes
1745-6215Z	Trials		http://www.trialsjournal.com/	BioMed Central	English	1745-6215		controlled trials,clinical trials,cardiovascular medicine	2006		2006-02-20T11:07:02Z	Diseases of the circulatory (Cardiovascular) system,Specialties of internal medicine,Internal medicine,Medicine,Cardiovascular,Medicine (General),Health Sciences	United Kingdom	Y	http://www.trialsjournal.com/about#apc	by	Yes
1471-2318Z	BMC Geriatrics		http://www.biomedcentral.com/bmcgeriatr/	BioMed Central	English	1471-2318		geriatrics,medicine	2001		2003-04-02T00:00:00Z	Geriatrics,Special situations and conditions,Internal medicine,Medicine,Internal medicine,Medicine (General),Health Sciences	United Kingdom	Y	http://www.biomedcentral.com/bmcgeriatr/about#apc	by	Yes
1471-213XZ	BMC Developmental Biology		http://www.biomedcentral.com/bmcdevbiol/	BioMed Central	English	1471-213X		developmental biology,biology	2001		2003-04-03T00:00:00Z	Biology (General),Science,Biology,Biology and Life Sciences	United Kingdom	Y	http://www.biomedcentral.com/bmcdevbiol/about#apc	by	Yes
1471-2156Z	BMC Genetics		http://www.biomedcentral.com/bmcgenet/	BioMed Central	English	1471-2156		genetics	2000		2003-04-02T00:00:00Z	Genetics,Biology (General),Science,Genetics,Biology,Biology and Life Sciences	United Kingdom	Y	http://www.biomedcentral.com/bmcgenet/ifora/	by	Yes
1472-6831Z	BMC Oral Health		http://www.biomedcentral.com/bmcoralhealth	BioMed Central	English	1472-6831		oral health,dentistry	2001		2003-06-23T00:00:00Z	Dentistry,Medicine,Dentistry,Health Sciences	United Kingdom	Y	http://www.biomedcentral.com/bmcoralhealth/about#apc	by	Yes
1471-2393Z	BMC Pregnancy and Childbirth		http://www.biomedcentral.com/bmcpregnancychildbirth/	BioMed Central	English	1471-2393		pregnancy,childbirth,medicine	2001		2003-04-03T00:00:00Z	Gynecology and obstetrics,Medicine,Gynecology and Obstetrics,Medicine (General),Health Sciences	United Kingdom	Y	http://www.biomedcentral.com/bmcpregnancychildbirth/about#apc	by	Yes
1475-2875Z	Malaria Journal		http://www.malariajournal.com/	BioMed Central	English	1475-2875		malaria,medicine	2002		2003-07-07T00:00:00Z	Internal medicine,Medicine,Internal medicine,Medicine (General),Health Sciences	United Kingdom	Y	http://www.malariajournal.com/about#apc	by	Yes
0350-6886Z	Sigurnost	Safety	http://hrcak.srce.hr/index.php?lang=en&show=casopis&id_casopis=30	Zavod za istraživanje i razvoj sigurnosti d.d./Institute of safety research and development	English,Croatian	0350-6886		technical sciences,public health,health care,law,psychology	2006		2007-05-07T16:49:55Z	Technology (General),Technology,Technology (General),Technology and Engineering,Environmental technology. Sanitary engineering,Technology,Environmental Technology,Technology and Engineering	Croatia	N	http://hrcak.srce.hr/upute/guide_authors_SAFETY.pdf		Yes
1308-7576Z1308-7584	Yüzüncü Yil Üniversitesi Tarim Bilimeri Dergisi	Yuzuncu Yil University Journal of Agricultural Sciences	http://tarimdergisi.yyu.edu.tr/index.html	Yuzuncu Yil University	Turkish,English	1308-7576	1308-7584	agriculture,plant,animal,food,soil	2000		2010-02-23T10:39:51Z	Agriculture (General),Agriculture,Agriculture (General),Agriculture and Food Sciences	Turkey	Y	http://tarimdergisi.yyu.edu.tr/httpdocseng/yayinilk.html		Yes
1212-1185Z1213-8312	Acta Universitatis Palackianae Olomucensis : Gymnica		http://www.gymnica.upol.cz	Palacky University	English	1212-1185	1213-8312	kinanthropology,sports,public health,biomechanics,physiotherapy	2005		2009-11-25T15:48:03Z	Sports,Recreation. Leisure,Geography. Anthropology. Recreation,Sports Science,Social Sciences	Czech Republic	N	http://www.gymnica.upol.cz/index.php/gymnica/about/submissions#authorGuidelines	by	Yes
1028-7736Z	Télédétection		http://www.teledetection.net	Editions scientifiques GB	French	1028-7736		remote sensing,teledetection,earth observation	1999		2008-03-18T11:14:43Z	Geography (General),Geography. Anthropology. Recreation,Geography,Earth and Environmental Sciences	France	N	http://www.teledetection.net/index.asp?lg=1&menu=282&vue=		Yes
1528-8404Z	The Internet Journal of Radiology		http://www.ispub.com/journal/the-internet-journal-of-radiology/	Internet Scientific Publications, LLC	English	1528-8404		medical technology,radiology	2000		2003-04-08T11:51:07Z	Medical physics. Medical radiology. Nuclear medicine,Medicine (General),Medicine,Internal medicine,Medicine (General),Health Sciences	United States	Y	http://www.quickmedpub.com/		Yes
1540-269XZ	The Internet Journal of World Health and Societal Politics		http://www.ispub.com/journal/the-internet-journal-of-world-health-and-societal-politics/	Internet Scientific Publications, LLC	English	1540-269X		medical sciences,health,politics	2002		2003-04-08T11:42:05Z	Medicine (General),Medicine,Medicine (General),Health Sciences	United States	Y	http://www.quickmedpub.com/		Yes
1531-2976Z	The Internet Journal of Pharmacology		http://www.ispub.com/journal/the-internet-journal-of-pharmacology/	Internet Scientific Publications, LLC	English	1531-2976		pharmacy,materia medica	2001		2003-04-08T11:42:05Z	Therapeutics. Pharmacology,Medicine,Therapeutics,Medicine (General),Health Sciences	United States	Y	http://www.quickmedpub.com/		Yes
1528-8315Z	The Internet Journal of Health		http://www.ispub.com/journal/the-internet-journal-of-health/	Internet Scientific Publications, LLC	English	1528-8315		medical sciences	2000		2003-04-08T11:42:05Z	Medicine (General),Medicine,Medicine (General),Health Sciences	United States	Y	http://www.quickmedpub.com/		Yes
1540-2630Z	The Internet Journal of Genomics and Proteomics		http://ispub.com/IJGP	Internet Scientific Publications, LLC	English	1540-2630		genomics,proteomics,biotechnology	2003		2003-04-08T11:42:05Z	Biology (General),Science,Biology,Biology and Life Sciences,Genetics,Biology (General),Science,Genetics,Biology,Biology and Life Sciences	United States	Y	http://www.quickmedpub.com/		Yes
1475-2891Z	Nutrition Journal		http://www.nutritionj.com/	BioMed Central	English	1475-2891		nutrition	2002		2003-07-07T00:00:00Z	Nutrition. Foods and food supply,Home economics,Technology,Nutrition and Food Sciences,Agriculture and Food Sciences	United Kingdom	Y	http://www.nutritionj.com/info/instructions/	by	Yes
1476-4598Z	Molecular Cancer		http://www.molecular-cancer.com/	BioMed Central	English	1476-4598		oncology,cancer,medicine	2002		2003-04-22T00:00:00Z	Neoplasms. Tumors. Oncology. Including cancer and carcinogens,Internal medicine,Medicine,Oncology,Medicine (General),Health Sciences	United Kingdom	Y	http://www.molecular-cancer.com/about#apc	by	Yes
1477-5751Z	Journal of Negative Results in Biomedicine	JNRBM	http://www.jnrbm.com/home/	BioMed Central	English	1477-5751		medicine,biology,biomedicine	2002		2003-07-08T00:00:00Z	Medicine (General),Medicine,Medicine (General),Health Sciences	United Kingdom	Y	http://www.jnrbm.com/about#apc	by	Yes
1477-3155Z	Journal of Nanobiotechnology		http://www.jnanobiotechnology.com	BioMed Central	English	1477-3155		biotechnology,medicine,biology	2003		2003-06-26T00:00:00Z	Biotechnology,Chemical technology,Technology,Biotechnology,Life Sciences,Biology and Life Sciences	United Kingdom	Y	http://www.jnanobiotechnology.com/about#apc	by	Yes
1478-4505Z	Health Research Policy and Systems		http://www.health-policy-systems.com/home	BioMed Central	English	1478-4505		public health,evidence-based,health research policy,health research systems,health equity	2003		2003-06-25T00:00:00Z	Public aspects of medicine,Medicine,Public Health,Health Sciences	United Kingdom	Y	http://www.health-policy-systems.com/about/apcfaq	by	Yes
1477-7525Z	Health and Quality of Life Outcomes		http://www.hqlo.com/	BioMed Central	English	1477-7525		medical therapy,public health	2003		2003-06-25T00:00:00Z	Public aspects of medicine,Medicine,Public Health,Health Sciences	United Kingdom	Y	http://www.hqlo.com/about/apcfaq	by	Yes
2079-0767Z	Vestnik Nacionalʹnogo Tehničeskogo Universiteta "HPI" : Tehničeskij Progress i Effektivnostʹ Proizvodstva		http://tpep.khpi.edu.ua/	Kharkiv Polytechnic Institute	Ukrainian,Russian,English	2079-0767		economic research,state regulation of production	2012		2013-09-04T17:15:15Z	Economic theory. Demography,Social Sciences,Economics,Business and Economics	Ukraine	N	http://tpep.khpi.edu.ua/about/submissions#authorGuidelines		Yes
1476-0711Z	Annals of Clinical Microbiology and Antimicrobials		http://www.ann-clinmicrob.com/home/	BioMed Central	English	1476-0711		microbiology,biology,medical science	2002		2003-06-06T00:00:00Z	Microbiology,Science,Microbiology,Biology,Biology and Life Sciences	United Kingdom	Y	http://www.ann-clinmicrob.com/info/instructions/	by	Yes
1876-8830Z	Journal of Social Intervention : Theory and Practice		http://www.journalsi.org/index.php/si	Igitur, Utrecht Publishing & Archiving Services	English,Dutch	1876-8830		social work,social policy,social problem analysis,intervention planning,social care practice,community work,intervention programs	2005		2009-06-05T09:54:37Z	Sociology (General),Social Sciences,Sociology,Social Sciences	Netherlands	N	http://www.journalsi.org/index.php/si/about/submissions#authorGuidelines	by-nc-nd	Yes
1687-8434Z1687-8442	Advances in Materials Science and Engineering		http://www.hindawi.com/journals/amse/	Hindawi Publishing Corporation	English	1687-8434	1687-8442	materials science,engineering	2009		2009-06-05T10:31:00Z	Physics,Science,Physics (General),Physics and Astronomy,Materials of engineering and construction. Mechanics of materials,Electrical engineering. Electronics. Nuclear engineering,Technology,Materials,Technology and Engineering	Egypt	Y	http://www.hindawi.com/journals/amse/apc/	by	Yes
1535-7414Z	Alcohol Research and Health		http://www.niaaa.nih.gov/Publications/AlcoholResearch/default.htm	U.S. National Institute on Alcohol Abuse and Alcoholism	English	1535-7414		alcoholism,drug abuse,public health	1999		2003-03-17T15:53:14Z	Social pathology. Social and public welfare. Criminology,Social Sciences,Social and Public Welfare,Sociology,Social Sciences	United States	NY			Yes
1687-8132Z1687-8140	Advances in Mechanical Engineering		http://www.hindawi.com/journals/ame/	Hindawi Publishing Corporation	English	1687-8132	1687-8140	mechanical engineering	2009		2009-06-05T10:50:11Z	Mechanics of engineering. Applied mechanics,Engineering (General). Civil engineering (General),Technology,Mechanical Engineering,Technology and Engineering	Egypt	Y	http://www.hindawi.com/journals/ame/apc/	by	Yes
1138-4891Z1988-4672	Revista de Contabilidad : Spanish Accounting Review	RC-SAR	http://www.rc-sar.es/	Elsevier	Spanish,English	1138-4891	1988-4672	auditing,environmental accounting,social accounting,management accounting,corporate governance	1997		2009-02-16T15:47:46Z	Business,Commerce,Social Sciences,Business and Management,Business and Economics	Spain	N	http://ees.elsevier.com/rcsar/		Yes
2076-5061Z	Recent Research in Science and Technology		http://recent-science.com/index	SILAE, Italy	English	2076-5061		plant science,animal science,physics,chemistry,technology	2009		2009-11-18T13:13:09Z	Science (General),Science,Science (General),Science General	Italy	N	http://recent-science.com/information/authors		Yes
1852-0723Z	Cuba Arqueológica : Revista Digital de Arqueología de Cuba y el Caribe		http://www.cubaarqueologica.org/index.php?q=node/55	Cuba Arqueológica	Spanish	1852-0723		cultural heritage,anthropology,Cuba,the Caribbean region	2008		2010-09-09T09:12:39Z	Archaeology,Auxiliary sciences of history,Archaeology,History and Archaeology	Cuba	N	http://cubaarqueologica.org/document/ra5n1-12.pdf	by-nc-nd	Yes
1045-8077Z	URISA Journal		http://www.urisa.org/resources/urisa-journal/	Urban and Regional Information Systems Association	English	1045-8077		information science,computer applications,geospatial science,geographic information systems (GIS)	1998		2003-05-08T00:00:00Z	Electronic computers. Computer science,Instruments and machines,Mathematics,Science,Computer Science,Technology and Engineering,Communities. Classes. Races,Social Sciences,Sociology,Social Sciences	United States	N	http://www.urisa.org/resources/urisa-journal/		Yes
1525-321XZ	Journal of southern academic and special librarianship	JSASL	http://southernlibrarianship.icaap.org/index.html	International Consortium for the Advancement of Academic Publication	English	1525-321X		library and information science	1999	2001	2003-11-20T00:00:00Z	Bibliography. Library science. Information resources,Library and Information Science,Social Sciences	Canada	N	http://southernlibrarianship.icaap.org/accept.htm		Yes
1405-6666Z	Revista Mexicana de Investigación Educativa	Mexican Journal of Educational Research	http://www.comie.org.mx/revista/	Consejo Mexicano de Investigación Educativa, A.C.	Spanish,English	1405-6666		teaching	1996		2003-11-11T00:00:00Z	Special aspects of education,Education,Education,Social Sciences	Mexico	N			Yes
1099-839XZ	Current Issues in Education		http://cie.asu.edu/	Arizona State University	English	1099-839X		education	1998		2003-10-15T00:00:00Z	Theory and practice of education,Education,Education,Social Sciences	United States	N	http://cie.asu.edu/ojs/index.php/cieatasu/about/submissions#onlineSubmissions		Yes
1492-3831Z	International Review of Research in Open and Distance Learning	IRROLD	http://www.irrodl.org/	Athabasca University Press	English	1492-3831		education,distance learning	2000		2003-09-24T00:00:00Z	Special aspects of education,Education,Education,Social Sciences	Canada	N	http://www.irrodl.org/index.php/irrodl/about/submissions#authorGuidelines	by	Yes
1547-9714Z1539-3585	Journal of Information Technology Education : Research	JITE : Research	http://www.informingscience.us/icarus/journals/jiteresearch	Informing Science Institute	English	1547-9714	1539-3585	information technology	2002		2003-09-26T00:00:00Z	Special aspects of education,Education,Education,Social Sciences	United States	N	http://www.informingscience.us/icarus/journals/jiteresearch/submitpaper		Yes
1445-0445Z	Outskirts: Feminisms along the Edge		http://www.chloe.uwa.edu.au/outskirts/	University of Western Australia	English	1445-0445		gender studies,feminism,social science	1996		2003-09-19T00:00:00Z	The family. Marriage. Woman,Social Sciences,Gender Studies,Social Sciences	Australia	N	http://www.chloe.uwa.edu.au/outskirts/submissions		Yes
1765-2553Z1634-0744	Carnets de Géologie	Notebooks on Geology	http://paleopolis.rediris.es/cg/uk-index.html	Carnets de Géologie	English,French,Italian,Spanish,German	1765-2553	1634-0744	geology	2002		2003-11-20T00:00:00Z	Geology,Science,Earth Sciences,Earth and Environmental Sciences	France	N	http://paleopolis.rediris.es/cg/uk-information.html#Recommendations	by-nc-sa	Yes
1076-9803Z	New York Journal of Mathematics		http://nyjm.albany.edu:8000/nyjm/nyjm.html	Electronic Journals Project	English	1076-9803		mathematics	1994		2003-11-17T00:00:00Z	Mathematics,Science,Mathematics,Mathematics and Statistics	United States	N	http://nyjm.albany.edu/Instr.html		Yes
1431-0635Z1431-0643	Documenta Mathematica		http://www.math.uni-bielefeld.de/documenta/Welcome-deu.html	Universität Bielefeld	English,German,French	1431-0635	1431-0643	mathematics	1996		2003-11-17T00:00:00Z	Mathematics,Science,Mathematics,Mathematics and Statistics	Germany	N	http://www.math.uni-bielefeld.de/documenta/HinweiseA.html		Yes
1224-2780Z1843-2875	Balkan Journal of Geometry and Its Applications		http://www.mathem.pub.ro/bjga	Geometry Balkan Press, Bucharest	English	1224-2780	1843-2875	mathematics,geometry	1996		2003-11-17T00:00:00Z	Mathematics,Science,Mathematics,Mathematics and Statistics	Romania	N	http://www.mathem.pub.ro/auth9f.txt		Yes
1526-1719Z	Journal of Graph Algorithms and Applications		http://jgaa.info/	Brown University	English	1526-1719		mathematics,computer science,graph algorithms	1997		2003-11-17T00:00:00Z	Mathematics,Science,Mathematics,Mathematics and Statistics	United States	N	http://jgaa.info/authors.jsp		Yes
1239-629XZ1798-2383	Annales Academiae Scientiarum Fennicae. Mathematica		http://www.acadsci.fi/mathematica/	Academia Scientiarum Fennica	English	1239-629X	1798-2383	mathematics	1993		2003-11-17T00:00:00Z	Mathematics,Science,Mathematics,Mathematics and Statistics	Finland	N	http://www.maths.soton.ac.uk/EMIS/journals/AASF/instr.html		Yes
1072-6691Z	Electronic Journal of Differential Equations	EJDE	http://ejde.math.txstate.edu	Texas State University	English	1072-6691		mathematics,differential equations	1993		2003-03-24T00:00:00Z	Mathematics,Science,Mathematics,Mathematics and Statistics	United States	N	http://ejde.math.txstate.edu/i2authors.html	by-nc	Yes
1094-4087Z	Optics Express		http://www.opticsexpress.org	Optical Society of America (OSA)	English	1094-4087		optics,physics	1997		2003-11-20T00:00:00Z	Optics. Light,Physics,Science,Optics and Lights,Physics (General),Physics and Astronomy	United States	Y	http://www.opticsinfobase.org/oe/submit/review/pub_charge.cfm		Yes
1027-4642Z	Journal of Physical Studies		http://www.ktf.franko.lviv.ua/JPS/index.html	West Ukrainian Physical Society	English,Ukrainian	1027-4642		physics,nuclear physics,matter physics,astrophysics	1997		2003-03-31T00:00:00Z	Physics,Science,Physics (General),Physics and Astronomy	Ukraine	NY	http://www.ktf.franko.lviv.ua/JPS/rules.html		Yes
1097-3087Z	Cultural Logic : an Electronic Journal of Marxist Theory and Practice		http://eserver.org/clogic/	Department of English and Foreign Languages	English	1097-3087		political theory	1997		2003-09-19T00:00:00Z	Political theory,Political science,Political Science,Law and Political Science	United States	N	http://clogic.eserver.org/interests.html		Yes
2042-115XZ	European Journal of Law and Technology		http://ejlt.org/	Queen's University of Belfast	English	2042-115X		law,technology,intellectual property,computer crime,e-commerce,privacy,data protection,patents,copyright,trademarks,e-governance	2010		2010-04-16T12:34:48Z	Law in general. Comparative and uniform law. Jurisprudence,Law,Law,Law and Political Science	United Kingdom	N	http://ejlt.org//about/submissions#authorGuidelines		Yes
1387-3091Z	Electronic Journal of Comparative Law	EJCL	http://www.ejcl.org/	Tilburg University Schoordijk Institute	English,French,German	1387-3091		methodology of comparative law	1997		2003-09-19T00:00:00Z	Law in general. Comparative and uniform law. Jurisprudence,Law,Law,Law and Political Science	Netherlands	N	http://www.ejcl.org/general/submit.html		Yes
1534-7362Z	Journal of Vision		http://www.journalofvision.org	Association for Research in Vision and Ophthalmology	English	1534-7362		ophthalmology,medicine	2001		2003-04-09T00:00:00Z	Ophthalmology,Medicine,Ophthalmology,Medicine (General),Health Sciences	United States	Y	http://www.journalofvision.org/site/misc/publication.xhtml#PC		Yes
0019-509XZ1998-4774	Indian Journal of Cancer		http://www.indianjcancer.com/	Medknow Publications	English	0019-509X	1998-4774	medicine,cancer,oncology	2002		2003-08-08T00:00:00Z	Neoplasms. Tumors. Oncology. Including cancer and carcinogens,Internal medicine,Medicine,Oncology,Medicine (General),Health Sciences	India	N	http://www.indianjcancer.com/contributors.asp		Yes
1482-1826Z	Journal of Pharmacy and Pharmaceutical Sciences		http://ejournals.library.ualberta.ca/index.php/JPPS/index	Canadian Society for Pharmaceutical Sciences	English	1482-1826		pharmacy,pharmaceutical science,medicine	1998		2003-06-06T00:00:00Z	Pharmacy and materia medica,Medicine,Pharmacy and materia medica,Medicine (General),Health Sciences	Canada	N	http://www.ualberta.ca/~csps/Journals/InstructionsToAuthors.htm		Yes
1087-2981Z	Medical Education Online	MEO	http://www.med-ed-online.org/index.html	Co-Action Publishing	English	1087-2981		health education	1996		2003-09-24T00:00:00Z	Special aspects of education,Education,Education,Social Sciences,Medicine (General),Medicine,Medicine (General),Health Sciences	United States	N	http://www.med-ed-online.org/submit.htm	by	Yes
0256-4947Z0975-4466	Annals of Saudi Medicine		http://annsaudimed.net/	King Faisal Specialist Hospital and Research Centre	English	0256-4947	0975-4466	medicine,surgery,clinical studies	2012		2003-06-06T00:00:00Z	Medicine (General),Medicine,Medicine (General),Health Sciences	Saudi Arabia	N	http://www.annsaudimed.net/index.php/resource_center.html		Yes
1488-2159Z	Journal of the Canadian Dental Association	JCDA	http://www.jcda.ca/	Canadian Dental Association	English,French	1488-2159		dentistry,oral health	1998		2003-06-03T00:00:00Z	Dentistry,Medicine,Dentistry,Health Sciences	Canada	N	http://www.jcda.ca/about_jcda/information_for_authors/		Yes
1173-7956Z	Healthcare Review Online		http://www.hinz.org.nz/journal	Enigma Publishing Ltd	English	1173-7956		healthcare,public health,medicine	1996	2002	2003-03-25T00:00:00Z	Public aspects of medicine,Medicine,Public Health,Health Sciences	New Zealand	NY			Yes
1034-7674Z	New South Wales Public Health Bulletin	NSW Public Health Bulletin	http://www0.health.nsw.gov.au/publichealth/phb/index.asp	New South Wales Ministry of Health	English	1034-7674		medicine,public health	1990		2003-07-22T00:00:00Z	Public aspects of medicine,Medicine,Public Health,Health Sciences	Australia	N	http://www0.health.nsw.gov.au/publichealth/phb/authors.asp		Yes
0103-6351Z	Nova Economia		http://www.face.ufmg.br/novaeconomia/eng/	Federal University of Minas Gerais	English,Portuguese	0103-6351		economics	2000		2003-09-18T00:00:00Z	Economic theory. Demography,Social Sciences,Economics,Business and Economics	Brazil	N	http://www.face.ufmg.br/novaeconomia/eng/instructions.html		Yes
1326-4443Z	Journal of Empirical Generalisations in Marketing Science	JEMS	http://www.empgens.com/	University of South Australia	English	1326-4443		marketing,consumption,economics,business	1996		2003-09-19T00:00:00Z	Commerce,Social Sciences,Business and Management,Business and Economics	Australia	N	http://www.empgens.com/guide/guide.html		Yes
1084-3981Z	B Quest		http://www.westga.edu/~bquest/	Richards College of Business, University of West Georgia	English	1084-3981		business,economics,commerce	1996		2003-10-15T00:00:00Z	Commerce,Social Sciences,Business and Management,Business and Economics	United States	N	http://www.westga.edu/~bquest/guide.html		Yes
1084-7561Z	Electronic Journal of Vedic Studies		http://www.ejvs.laurasianacademy.com/	Electronic Journal of Vedic Studies	English	1084-7561		vedic studies,religion	1995		2003-10-15T00:00:00Z	Religions. Mythology. Rationalism,Philosophy. Psychology. Religion,Religion,Philosophy and Religion	United States	N	http://www.ejvs.laurasianacademy.com/subm.htm		Yes
1076-9005Z	Journal of Buddhist Ethics		http://blogs.dickinson.edu/buddhistethics/	Pennsylvania State University	English	1076-9005		religion,philosophy,ethics	1994		2003-09-17T00:00:00Z	Buddhism,Philosophy. Psychology. Religion,Religion,Philosophy and Religion	United States	N	http://blogs.dickinson.edu/buddhistethics/submissions/		Yes
1094-5253Z	Journal of Southern Religion	JSR	http://jsr.fsu.edu/	West Virginia University	English	1094-5253		religion,theology	1998		2003-09-17T00:00:00Z	Religions. Mythology. Rationalism,Philosophy. Psychology. Religion,Religion,Philosophy and Religion	United States	N	http://jsr.fsu.edu/submit.htm		Yes
1089-7747Z	T C : a Journal of Biblical Textual Criticism		http://purl.org/TC	Society of Biblical Literature	English	1089-7747		religion,theology	1996		2003-11-21T00:00:00Z	The Bible,Philosophy. Psychology. Religion,The Bible,Religion,Philosophy and Religion	United States	N	http://rosetta.reltech.org/TC/TC.html#page=about		Yes
1541-0099Z	Journal of Evolution and Technology		http://www.jetpress.org/index.html	Institute for Ethics and Emerging Technologies	English	1541-0099		technology	1998		2003-09-16T00:00:00Z	History of scholarship and learning. The humanities,General Works,Philosophy (General),Philosophy. Psychology. Religion,Philosophy,Philosophy and Religion	United States	N	http://jetpress.org/authors.html		Yes
1393-614XZ	Minerva : an Internet Journal of Philosophy		http://www.ul.ie/~philos/index.html	University of Limerick	English	1393-614X		philosophical theory	1997		2003-09-16T00:00:00Z	Philosophy (General),Philosophy. Psychology. Religion,Philosophy,Philosophy and Religion	Ireland	N	http://www.ul.ie/~philos/vol10/Own10.html		Yes
1609-7211Z	Revista Peruana de Epidemiologia		http://rpe.epiredperu.net/portada.html	Epiredperu	Spanish,English	1609-7211		epidemiology,global health	2008		2010-02-24T14:37:28Z	Public aspects of medicine,Medicine,Public Health,Health Sciences	Peru	N	http://rpe.epiredperu.net/normas_publica_00.html	by-nc-nd	Yes
1533-242XZ	The Reading Matrix : an International Online Journal		http://www.readingmatrix.com/journal.html	Meena Singhal & John I. Liontas	English	1533-242X		linguistics,education	2001		2003-09-29T00:00:00Z	Philology. Linguistics,Language and Literature,Linguistics,Languages and Literatures	United States	N	http://www.readingmatrix.com/submission.html		Yes
1543-1002Z	Nineteenth-Century Art Worldwide		http://19thc-artworldwide.org	Association of Historians of Nineteenth-Century Art	English	1543-1002		art history,painting,sculpture,graphic arts,photography,architecture,decorative arts	2002		2003-09-24T00:00:00Z	Arts in general,Fine Arts,Arts in general,Arts and Architecture	United States	N	http://19thc-artworldwide.org/index.php?option=com_content&view=article&id=51&Itemid=57		Yes
1437-904XZ	Concilium Medii Aevi	CMA	http://cma.gbv.de/z/pages	Edition Ruprecht	German,English	1437-904X		art history,archaeology,history,Middle Ages	1998		2003-10-03T00:00:00Z	History of the arts,Arts in general,Fine Arts,History of arts,Arts and Architecture,History (General),History (General) and history of Europe,History,History and Archaeology	Germany	N	http://cma.gbv.de/z/pages/dr,cma,d,00020,2		Yes
1678-8621Z	Ambiente Construído	Revista Ambiente Construído	http://www.seer.ufrgs.br/index.php/ambienteconstruido	Associação Nacional de Tecnologia do Ambiente Construído	Portuguese,Spanish,English	1678-8621		construction,built environment,technology	1997		2009-06-11T09:34:27Z	Building construction,Technology,Construction,Technology and Engineering	Brazil	N	http://www.seer.ufrgs.br/index.php/ambienteconstruido/about/submissions#authorGuidelines		Yes
1457-2362Z	Mirator		http://www.glossa.fi/mirator/index.html	University of Jyväskylä	English,Finnish,Swedish	1457-2362		history,Middle Ages	2000		2003-11-14T00:00:00Z	History (General),History (General) and history of Europe,History,History and Archaeology	Finland	N	http://www.glossa.fi/mirator/ohje_en.html		Yes
0918-7960Z1348-8570	Anthropological Science		http://www.jstage.jst.go.jp/browse/ase	The Anthropological Society of Nippon	English	0918-7960	1348-8570	biological anthropology	2003		2003-12-15T00:00:00Z	Anthropology,Geography. Anthropology. Recreation,Anthropology,Social Sciences	Japan	Y	http://wwwsoc.nii.ac.jp/jinrui/as/kitei_e.html		Yes
1303-2968Z	Journal of Sports Science and Medicine		http://www.jssm.org	University of Uludag	English	1303-2968		sports science,sports medicine	2002		2003-11-05T00:00:00Z	Sports,Recreation. Leisure,Geography. Anthropology. Recreation,Sports Science,Social Sciences,Sports medicine,Special situations and conditions,Internal medicine,Medicine,Sports Medicine,Medicine (General),Health Sciences	Turkey	Y	http://www.jssm.org/submission.php	by-nc	Yes
0914-9198Z	Journal of Toxicologic Pathology		http://www.jstage.jst.go.jp/browse/tox	Japanese Society of Toxicologic Pathology	English	0914-9198		toxicologic pathology,medicine	1998		2004-01-30T00:00:00Z	Toxicology. Poisons,Public aspects of medicine,Medicine,Public Health,Health Sciences	Japan	Y	https://www.jstage.jst.go.jp/jstage/pub/tox/pdf/regulation_en.pdf		Yes
0388-1350Z1880-3989	The Journal of Toxicological Sciences		http://www.jstage.jst.go.jp/browse/jts	The Japanese Society of Toxicology	English	0388-1350	1880-3989	toxicology,medicine	1976		2004-01-30T00:00:00Z	Public aspects of medicine,Medicine,Public Health,Health Sciences	Japan	NY			Yes
1524-7929Z	Annals of Long-Term Care		http://www.annalsoflongtermcare.com/	MultiMedia Health Care/Freedom, American Geriatrics Society	English	1524-7929		public health,medicine	2001		2003-12-09T00:00:00Z	Public aspects of medicine,Medicine,Public Health,Health Sciences	United States	NY	http://annalsoflongtermcare.com/author-guidelines		Yes
0021-2180Z	Israel Journal of Medical Sciences	IMAJ	http://www.ima.org.il/imaj/	Israel Medical Association	English	0021-2180		medicine	1999		2003-12-12T00:00:00Z	Medicine (General),Medicine,Medicine (General),Health Sciences	Israel	Y	http://www.ima.org.il/imaj/StaticPage.aspx?Page=6817		Yes
1734-1140Z	Pharmacological Reports		http://www.if-pan.krakow.pl/pjp/	Inst. of Pharmacology, Polish Acad. of Sciences	English	1734-1140		medicine,pharmacology	2005		2005-03-14T13:42:42Z	Therapeutics. Pharmacology,Medicine,Therapeutics,Medicine (General),Health Sciences	Poland	N	www.if-pan.krakow.pl/pjp		Yes
1741-7015Z	BMC Medicine		http://www.biomedcentral.com/bmcmed/	BioMed Central	English	1741-7015		medicine,medical science	2003		2003-12-09T00:00:00Z	Medicine (General),Medicine,Medicine (General),Health Sciences	United Kingdom	Y	http://www.biomedcentral.com/bmcmed/about#apc	by	Yes
1542-2666Z1559-470X	The Journal of Applied Research in Veterinary Medicine		http://www.jarvm.com/	Veterinary Solutions	English	1542-2666	1559-470X	veterinary medicine	2003		2003-11-28T00:00:00Z	Veterinary medicine,Animal culture,Agriculture,Animal Sciences,Agriculture and Food Sciences	United States	Y	http://www.jarvm.com/manuscript.htm		Yes
1539-1515Z	Astronomy Education Review		http://aer.aas.org/	American Astronomical Society	English	1539-1515		space science,education	2001		2003-12-01T00:00:00Z	Special aspects of education,Education,Education,Social Sciences,Astronomy,Science,Astronomy (General),Physics and Astronomy	United States	N	http://aer.aas.org/authors/submissions		Yes
1680-743XZ1683-8602	Journal of Data Science		http://www.sinica.edu.tw/~jds/	Columbia University, New York	English	1680-743X	1683-8602	statistics,data science,applied science	2003		2004-01-21T00:00:00Z	Statistics,Social Sciences,Statistics,Mathematics and Statistics	United States	N	http://www.jds-online.com/submission		Yes
0255-0857Z1998-3646	Indian Journal of Medical Microbiology		http://www.ijmm.org/	Medknow Publications	English	0255-0857	1998-3646	medical microbiology	2001		2004-01-20T00:00:00Z	Microbiology,Science,Microbiology,Biology,Biology and Life Sciences	India	Y	http://www.ijmm.org/contributors.asp#apc		Yes
0352-5139Z1820-7421	Journal of the Serbian Chemical Society		http://www.shd.org.rs/JSCS/	Serbian Chemical Society	English	0352-5139	1820-7421	chemistry	1999		2003-12-17T00:00:00Z	Chemistry,Science,Chemistry (General),Chemistry	Serbia	N	http://www.shd.org.rs/JSCS/JSCS-instruction.HTM	by-nc-nd	Yes
0011-1643Z1334-417X	Croatica Chemica Acta - izd. tromjesečno Hrvatsko kemijsko društvo		http://public.carnet.hr/ccacaa/	Croatian Chemical Society	English	0011-1643	1334-417X	chemistry	1998		2003-12-17T00:00:00Z	Chemistry,Science,Chemistry (General),Chemistry	Croatia	N	http://public.carnet.hr/ccacaa/CCA-PDF/cca2006/CCA_79_2006_a5-a8_instr_authors.pdf		Yes
1832-2522Z	Provenance : The Journal of Public Record Office Victoria	Provenance	http://prov.vic.gov.au/publications/provenance	Public Record Office Victoria	English	1832-2522		social history,cultural history,archival research,Victoria,Australia	2003		2006-06-09T14:33:35Z	Social history and conditions. Social problems. Social reform,Social Sciences,Sociology,Social Sciences	Australia	N	http://prov.vic.gov.au/publications/provenance/author-guidelines		Yes
1607-324XZ	Condensed Matter Physics		http://www.icmp.lviv.ua/journal/	Institute for Condensed Matter Physics	English,Ukrainian	1607-324X		physics of solid,liquid and amorphous systems,phase equilibria,phase transitions,thermal,structural,electric,magnetic and optical properties of condensed matter	1993		2003-12-03T00:00:00Z	Physics,Science,Physics (General),Physics and Astronomy	Ukraine	N	http://www.icmp.lviv.ua/journal/Instructions.html		Yes
1932-2038Z1932-2046	Connecticut Public Interest Law Journal		http://www.law.uconn.edu/student-bar-association/student-organizations/connecticut-public-interest-law-journal	The University of Connecticut School of Law	English	1932-2038	1932-2046	law	2001		2003-12-01T00:00:00Z	Law in general. Comparative and uniform law. Jurisprudence,Law,Law,Law and Political Science	United States	NY	http://www.law.uconn.edu/connecticut-public-interest-law-journal/submissions		Yes
0377-9343Z	The Indian Journal of Chest Diseases and Allied Sciences		http://www.medind.nic.in/iae/iaem.shtml	Vallabhbhai Patel Chest Institute, University of Delhi and the National College of Chest Physicians	English	0377-9343		medicine,chest diseases,cardiovascular diseases,respiratory diseases	2000		2003-12-12T00:00:00Z	Diseases of the circulatory (Cardiovascular) system,Specialties of internal medicine,Internal medicine,Medicine,Cardiovascular,Medicine (General),Health Sciences	India	NY			Yes
1523-1216Z	Cyberjournal for Pentecostal-Charismatic Research		http://www.pctii.org/cyberj/	Pentecostal Charismatic Churches of North America (PCCNA)	English	1523-1216		pentecostal charismatic	1997		2004-01-13T00:00:00Z	Christianity,Philosophy. Psychology. Religion,Religion,Philosophy and Religion	United States	NY	http://www.pctii.org/cyberj/		Yes
1677-2954Z	Ethic@ : an International Journal for Moral Philosophy	Revista Internacional de Filosofia da Moral	http://www.cfh.ufsc.br/ethic@/	Universitade Federal de Santa Catarina	English,Portuguese,German,Spanish	1677-2954		philosophy	2002		2003-11-24T00:00:00Z	Ethics,Philosophy. Psychology. Religion,Philosophy,Philosophy and Religion	Brazil	N	https://periodicos.ufsc.br/index.php/ethic/about/submissions#authorGuidelines		Yes
0734-5348Z	Annual of Urdu Studies	AUS	http://www.urdustudies.com/	University of Wisconsin	English,Urdu	0734-5348		urdu	1981		2004-01-15T00:00:00Z	Oriental languages and literatures,Language and Literature,Languages and Literatures	United States	N	http://www.urdustudies.com/aboutAUS.html		Yes
1931-6550Z1550-8366	Bulletin of the American Society for Information Science and Technology		http://www.asis.org/Bulletin/index.html	American Society for Information Science and Technology	English	1931-6550	1550-8366	library and information science	1995		2003-10-16T00:00:00Z	Bibliography. Library science. Information resources,Library and Information Science,Social Sciences	United States	N	http://www.asis.org/Bulletin/submit.html		Yes
0289-8063Z	Structural Engineering / Earthquake Engineering		http://www.jstage.jst.go.jp/browse/jsceseee	Japan Society of Civil Engineers	English	0289-8063		civil engineering,structural engineering,earthquake engineering	2002		2004-01-30T00:00:00Z	Building construction,Technology,Construction,Technology and Engineering	Japan	NY			Yes
0250-4707Z	Bulletin of Materials Science		http://www.ias.ac.in/matersci/	Indian Academy of Sciences, Springer	English	0250-4707		materials science	2000		2003-12-17T00:00:00Z	Engineering (General). Civil engineering (General),Technology,General and Civil Engineering,Technology and Engineering	India	Y	http://www.ias.ac.in/matersci/notes.pdf		Yes
1555-385XZ1554-2505	Air & Space Power Journal		http://www.airpower.au.af.mil/Index.asp	United States Air Force	English	1555-385X	1554-2505	air force,military	1999		2003-03-26T00:00:00Z	Motor vehicles. Aeronautics. Astronautics,Technology,Transportation,Technology and Engineering	United States	N	http://www.airpower.au.af.mil/Contribute.asp		Yes
0289-6540Z	Computer Software		http://www.jstage.jst.go.jp/browse/jssst	Japan Society for Software Science and Technology	English,Japanese	0289-6540		computer software,computer science	2000		2003-12-18T00:00:00Z	Electronic computers. Computer science,Instruments and machines,Mathematics,Science,Computer Science,Technology and Engineering	Japan	NY			Yes
1505-0297Z	Electronic Journal of Polish Agricultural Universities		http://www.ejpau.media.pl/	Polish Agricultural Schools of Higher Education	English	1505-0297		agriculture	1998		2003-12-15T00:00:00Z	Agriculture (General),Agriculture,Agriculture (General),Agriculture and Food Sciences	Poland	Y	http://www.ejpau.media.pl/publishers_regulations.html		Yes
1535-3656Z	Florida Philosophical Review	FPR	http://philosophy.cah.ucf.edu/fpr/	University of Central Florida	English	1535-3656		philosophical theory	2001		2004-02-09T15:02:10Z	Philosophy (General),Philosophy. Psychology. Religion,Philosophy,Philosophy and Religion	United States	N	http://philosophy.cah.ucf.edu/fpr/submissions.php		Yes
1179-5476Z	Clinical Medicine Insights : Case Reports		http://www.la-press.com/journal.php?journal_id=91	Libertas Academica	English	1179-5476		medical treatment	2010		2010-11-04T16:10:11Z	Medicine (General),Medicine,Medicine (General),Health Sciences	New Zealand	Y	http://www.la-press.com/author_resources.php?folder_id=121	by	Yes
1682-024XZ1681-715X	Pakistan Journal of Medical Sciences Online		http://www.pjms.com.pk/	Professional Medical Publications	English	1682-024X	1681-715X	medical sciences	2011		2004-02-17T12:39:49Z	Medicine (General),Medicine,Medicine (General),Health Sciences	Pakistan	Y	http://www.pjms.com.pk/authors.html		Yes
1645-6432Z	E-Journal of Portuguese History	e-JPH	http://www.brown.edu/Departments/Portuguese_Brazilian_Studies/ejph/	The University of Porto, Brown University	English	1645-6432		history,portuguese history	2003		2004-02-20T11:32:45Z	History of Spain,History (General) and history of Europe,History,History and Archaeology	Portugal	N	http://www.brown.edu/Departments/Portuguese_Brazilian_Studies/ejph/notes.html		Yes
1538-6414Z	Internet Electronic Journal of Molecular Design		http://www.biochempress.com/	BioChem Press	English	1538-6414		molecular design,chemistry,biochemistry,biology	2002		2004-02-20T11:43:22Z	Biochemistry,Organic chemistry,Chemistry,Science,Biochemistry,Life Sciences,Biology and Life Sciences	United States	NY	http://www.biochempress.com/iejmd_ia.html		Yes
0717-652XZ0717-6538	Gayana (Concepción)		http://www.scielo.cl/scielo.php?script=sci_serial&pid=0717-6538&lng=en&nrm=iso	Universidad de Concepción	English,Spanish,French	0717-652X	0717-6538	biological sciences	2000		2004-04-23T21:31:01Z	Zoology,Science,Zoology,Biology,Biology and Life Sciences,Oceanography,Geography. Anthropology. Recreation,Oceanography,Earth and Environmental Sciences	Chile	N	http://www.scielo.cl/revistas/gayana/einstruc.htm		Yes
0073-2435Z0717-7194	Historia (Santiago)		http://www.scielo.cl/scielo.php?script=sci_serial&pid=0717-7194&lng=en&nrm=iso	Pontificia Universidad Católica de Chile	Spanish,English	0073-2435	0717-7194	social sciences	2000		2004-04-23T21:31:01Z	America,History America,History,History and Archaeology	Chile	N	http://www.scielo.cl/revistas/historia/iinstruc.htm		Yes
0717-2877Z0718-0012	Ius et Praxis (En línea)		http://www.scielo.cl/scielo.php?script=sci_serial&pid=0718-0012&lng=en&nrm=iso	Universidad de Talca	Spanish	0717-2877	0718-0012	legal sciences	2001		2004-04-23T21:31:01Z	Law in general. Comparative and uniform law. Jurisprudence,Law,Law,Law and Political Science	Chile	N	http://www.scielo.cl/revistas/iusetp/einstruc.htm		Yes
0716-0917Z0717-6279	Proyecciones : Revista de Matemática		http://www.scielo.cl/scielo.php?script=sci_serial&pid=0716-0917&lng=en&nrm=iso	Universidad Católica del Norte	English	0716-0917	0717-6279	mathematics	2000		2004-04-23T21:31:01Z	Mathematics,Science,Mathematics,Mathematics and Statistics	Chile	N	http://www.scielo.cl/revistas/proy/iinstruc.htm		Yes
0716-1549Z0717-7518	Revista Chilena de Nutricíon		http://www.scielo.cl/scielo.php?script=sci_serial&pid=0717-7518&lng=en&nrm=iso	Sociedad Chilena de Nutrición, Bromatología y Toxicología	Spanish,Portuguese,English	0716-1549	0717-7518	health sciences	2002		2004-04-23T21:31:01Z	Nutrition. Foods and food supply,Home economics,Technology,Nutrition and Food Sciences,Agriculture and Food Sciences	Chile	N	http://www.scielo.cl/revistas/rchnut/iinstruc.htm		Yes
0716-2790Z0717-6252	Revista Musical Chilena		http://www.scielo.cl/scielo.php?script=sci_serial&pid=0716-2790&lng=en&nrm=iso	Universidad de Chile	Spanish	0716-2790	0717-6252	human sciences	1996		2004-04-23T21:31:01Z	Music,Music and books on Music,Music,Arts and Architecture	Chile	N	http://www.scielo.cl/revistas/rmusic/iinstruc.htm		Yes
0001-6012Z	Acta Médica Costarricense		http://www.scielo.sa.cr/scielo.php?script=sci_serial&pid=0001-6002&lng=en&nrm=iso	Colegio de Médicos y Cirujanos de Costa Rica	Spanish,English	0001-6012		health sciences	2000		2004-04-23T21:31:01Z	Medicine (General),Medicine,Medicine (General),Health Sciences	Costa Rica	N	http://www.scielo.sa.cr/revistas/amc/iinstruc.htm		Yes
0864-2125Z1561-3038	Revista Cubana de Medicina General Integral		http://scielo.sld.cu/scielo.php?script=sci_serial&pid=0864-2125&lng=en&nrm=iso	ECIMED	Spanish	0864-2125	1561-3038	health sciences	1995		2004-04-23T21:31:01Z	Medicine (General),Medicine,Medicine (General),Health Sciences	Cuba	N	http://scielo.sld.cu/revistas/mgi/iinstruc.htm		Yes
0301-5092Z	Veterinaria Mexico		http://www.redalyc.org/revista.oa?id=423	Universidad Nacional Autónoma de México	English,Spanish	0301-5092		health sciences	1999		2004-04-23T21:31:01Z	Animal culture,Agriculture,Animal Sciences,Agriculture and Food Sciences	Mexico	Y	http://redalyc.org/redalyc/media/normas/normcol423.html		Yes
0213-9111Z	Gaceta Sanitaria		http://scielo.isciii.es/scielo.php?script=sci_serial&pid=0213-9111&lng=es&nrm=iso	Ediciones Doyma, S.L.	Spanish,English	0213-9111		health sciences	2002		2004-04-23T21:31:01Z	Medicine (General),Medicine,Medicine (General),Health Sciences	Spain	N	http://scielo.isciii.es/revistas/gs/einstruc.htm		Yes
1012-2508Z	Cuadernos del Cendes		http://www.scielo.org.ve/scielo.php?script=sci_serial&pid=1012-2508&lng=es&nrm=iso	Universidad Central de Venezuela	Spanish	1012-2508		human sciences	2002		2004-04-23T21:31:01Z	Sociology (General),Social Sciences,Sociology,Social Sciences	Venezuela	N	http://www.scielo.org.ve/revistas/cdc/einstruc.htm		Yes
0378-7818Z1690-9763	Revista de la Facultad de Agronomía		http://www.revfacagronluz.org.ve/	Universidad del Zulia	English,Spanish,Portuguese	0378-7818	1690-9763	agricultural sciences	1995		2004-04-23T21:31:01Z	Agriculture (General),Agriculture,Agriculture (General),Agriculture and Food Sciences	Venezuela	Y	http://www.revfacagronluz.org.ve/instructions_authors.htm		Yes
1315-4125Z	Boletin Asociacio Matematica Vanezolana - English		http://www.ma.usb.ve/~bol-amv/	Venezuelan Mathematical Association	Spanish,English,French,Portuguese	1315-4125		mathematics	1994		2004-05-07T11:44:51Z	Mathematics,Science,Mathematics,Mathematics and Statistics	Venezuela	NY	http://www.ma.usb.ve/~bol-amv/infoauthor.html		Yes
2078-1865Z1560-683X	South African Journal of Information Management	SAJIM	http://www.sajim.co.za/index.php/SAJIM	AOSIS OpenJournals	English	2078-1865	1560-683X	information management theory,information management technologies,knowledge management,competitive intelligence,education,business	1999		2004-05-12T16:46:31Z	General Works,Multidisciplinary,General Works	South Africa	Y	http://www.sajim.co.za/index.php/sajim/pages/view/authors	by	Yes
0972-5229Z1998-359X	Indian Journal of Critical Care Medicine		http://www.ijccm.org/	Medknow Publications	English	0972-5229	1998-359X	emergency medicine	2003		2004-05-14T14:09:42Z	Medical emergencies. Critical care. Intensive care. First aid,Internal medicine,Medicine,Internal medicine,Medicine (General),Health Sciences	India	N	http://www.ijccm.org/contributors.asp	by-nc-sa	Yes
1810-6277Z1810-6285	Biogeosciences Discussions	BGD	http://www.biogeosciences.net	Copernicus Publications	English	1810-6277	1810-6285	astrobiology,exobiology,biodiversity and ecosystem function,biogeochemistry,biogeophysics,paleobiogeoscience	2004		2004-06-07T15:02:51Z	Geology,Science,Earth Sciences,Earth and Environmental Sciences,Biology (General),Science,Biology,Biology and Life Sciences	Germany	Y	http://www.biogeosciences.net/submission/service_charges.html	by	Yes
0953-6833Z1993-7288	Community Eye Health Journal		http://www.cehjournal.org	The International Centre for Eye Health (ICEH), London	English	0953-6833	1993-7288	eye health,eye care,health education	1998		2004-06-10T14:09:42Z	Ophthalmology,Medicine,Ophthalmology,Medicine (General),Health Sciences	United Kingdom	N	http://www.cehjournal.org/get-involved/#	by-nc-sa	Yes
0916-8818Z1348-4400	Journal of Reproduction and Development		http://www.jstage.jst.go.jp/browse/jrd	Society for Reproduction and Development	English	0916-8818	1348-4400	agriculture,animal science	1995		2004-06-18T13:58:25Z	Animal culture,Agriculture,Animal Sciences,Agriculture and Food Sciences	Japan	Y	https://www.jstage.jst.go.jp/jstage/pub/jrd/pdf/regulation_en.pdf		Yes
1341-9145Z1348-9585	Journal of Occupational Health		http://www.jstage.jst.go.jp/browse/joh	Japan Society for Occupational Health	English	1341-9145	1348-9585	medicine,Occupational Health	2002		2004-06-18T14:05:41Z	Internal medicine,Medicine,Internal medicine,Medicine (General),Health Sciences	Japan	CON	http://joh.sanei.or.jp/e/instractio.pdf		Yes
0011-1848Z1349-0990	Japanese Journal of Crop Science		http://www.jstage.jst.go.jp/browse/jcs	Crop Science Society of Japan	Japanese,English	0011-1848	1349-0990	crop science,agriculture	2003		2004-07-02T17:09:36Z	Agriculture (General),Agriculture,Agriculture (General),Agriculture and Food Sciences,Plant culture,Agriculture,Plant Sciences,Agriculture and Food Sciences	Japan	Y			Yes
0040-8727Z1349-3329	Tohoku Journal of Experimental Medicine	TJEM	http://www.jstage.jst.go.jp/browse/tjem	Tohoku University Medical Press	English,Japanese	0040-8727	1349-3329	medical sciences	1996		2004-07-02T17:34:38Z	Medicine (General),Medicine,Medicine (General),Health Sciences	Japan	Y	http://journal.med.tohoku.ac.jp/notice_to_authors/notice_to_authors.html		Yes
1092-4051Z	The Internet Journal of Emergency and Intensive Care Medicine		http://www.ispub.com/journal/the-internet-journal-of-emergency-and-intensive-care-medicine/	Internet Scientific Publications, LLC	English	1092-4051		intensive care,critical care,traumatology,first aid	1996		2004-08-16T00:00:00Z	Internal medicine,Medicine,Internal medicine,Medicine (General),Health Sciences	United States	Y	http://www.quickmedpub.com/		Yes
1937-8211Z	The Internet Journal of Geriatrics and Gerontology		http://www.ispub.com/journal/the-internet-journal-of-geriatrics-and-gerontology/	Internet Scientific Publications, LLC	English	1937-8211		gerontology	2003		2004-08-16T00:00:00Z	Geriatrics,Special situations and conditions,Internal medicine,Medicine,Internal medicine,Medicine (General),Health Sciences	United States	Y	http://www.quickmedpub.com/		Yes
1937-8270Z	The Internet Journal of Spine Surgery		http://www.ispub.com/journal/the-internet-journal-of-spine-surgery/	Internet Scientific Publications, LLC	English	1937-8270		surgery,back pain,neck pain,spinal care	2003		2004-08-16T00:00:00Z	Surgery,Medicine,Surgery,Medicine (General),Health Sciences	United States	Y	http://www.quickmedpub.com/		Yes
1542-8958Z	Digital Journal of Ophthalmology	DJO	http://www.djo.harvard.edu/	Massachusetts Eye and Ear Infirmary	English	1542-8958		ophthalmology,health,eyecare,vision	1997		2004-08-17T13:04:37Z	Ophthalmology,Medicine,Ophthalmology,Medicine (General),Health Sciences	United States	NY			Yes
1229-845XZ1976-555X	Journal of Veterinary Science		http://www.vetsci.org	Korean Society of Veterinary Science	English	1229-845X	1976-555X	veterinary science	2000		2004-08-20T12:51:50Z	Veterinary medicine,Animal culture,Agriculture,Animal Sciences,Agriculture and Food Sciences	South Korea	N	http://www.vetsci.org/manuscript.html		Yes
1085-3375Z1687-0409	Abstract and Applied Analysis	AAA	http://www.hindawi.com/journals/aaa	Hindawi Publishing Corporation	English	1085-3375	1687-0409	mathematics	1996		2006-03-10T15:43:23Z	Mathematics,Science,Mathematics,Mathematics and Statistics	United States	Y	http://www.hindawi.com/journals/aaa/apc/	by	Yes
0974-5963Z1742-6413	CytoJournal		http://www.cytojournal.com/	Medknow Publications	English	0974-5963	1742-6413	diagnostic cytopathology,molecular pathology	2004		2004-08-24T08:53:57Z	Cytology,Biology (General),Science,Cytology,Biology,Biology and Life Sciences	United Kingdom	Y	http://www.cytojournal.com/contributors.asp	by-nc-sa	Yes
0916-4804Z	Japanese Journal of Medical Mycology		http://www.jsmm.org/magazine/magazine.html	Japanese Journal of Medical Mycology	English,Japanese	0916-4804		medical mycology,veterinary mycology	2003		2004-09-06T10:06:52Z	Medicine (General),Medicine,Medicine (General),Health Sciences,Microbiology,Science,Microbiology,Biology,Biology and Life Sciences	Japan	N	http://www.jsmm.org/magazine/inst_authors.pdf		Yes
1092-0684Z	Neurosurgical Focus		http://thejns.org/toc/foc/current	American Association of Neurological Surgeons	English	1092-0684		neurosurgery,medical sciences	1996		2004-09-07T08:57:04Z	Surgery,Medicine,Surgery,Medicine (General),Health Sciences,Neurosciences. Biological psychiatry. Neuropsychiatry,Internal medicine,Medicine,Neurology,Medicine (General),Health Sciences	United States	Y	http://thejns.org/page/authorsInfo.jsp		Yes
1054-8289Z	The Future of Children		http://www.futureofchildren.org/	Princeton University	English	1054-8289		child welfare,children,public policy	1991		2004-09-07T16:31:04Z	Social sciences (General),Social Sciences,Social Sciences	United States	Y			Yes
1676-2649Z	Journal of Epilepsy and Clinical Neurophysiology		http://www.scielo.br/scielo.php?script=sci_serial&pid=1676-2649&lng=pt&nrm=iso	Liga Brasileira de Epilepsia	Portuguese,English,Spanish	1676-2649		medical sciences,psychiatry,neurology	2005		2004-09-08T16:33:43Z	Neurology. Diseases of the nervous system,Neurosciences. Biological psychiatry. Neuropsychiatry,Internal medicine,Medicine,Neurology,Medicine (General),Health Sciences	Brazil	CON	http://www.scielo.br/revistas/jecn/pinstruc.htm		Yes
0883-5365Z	Oral Tradition		http://journal.oraltradition.org	Center for Studies in Oral Tradition	English	0883-5365		oral tradition,folklore,anthropology	1986		2004-09-10T12:37:06Z	Folklore,Geography. Anthropology. Recreation,Anthropology,Social Sciences,Literature (General),Language and Literature,Languages and Literatures	United States	N	http://journal.oraltradition.org/about/prospective_authors		Yes
1552-5767Z1552-5775	The Permanente Journal		http://thepermanentejournal.org/	The Permanente Medical Groups and Kaiser Foundation Health Plan (KFHP)	English	1552-5767	1552-5775	evidence-based medicine,clinical practice	1997		2004-09-14T09:14:35Z	Medicine (General),Medicine,Medicine (General),Health Sciences	United States	N	http://www.thepermanentejournal.org/authors.html		Yes
1477-7029Z	Electronic Journal of Business Research Methods	EJBRM	http://www.ejbrm.com/	Academic Conferences International Limited	English	1477-7029		business,management	2002		2004-09-17T09:00:38Z	Business,Commerce,Social Sciences,Business and Management,Business and Economics	United Kingdom	NY	http://www.ejbrm.com/submission.html		Yes
1120-9992Z	Basic and Applied Myology	BAM	http://www.bio.unipd.it/bam/	Unipress Padova	English	1120-9992		mammals,myocardium,biological sciences,biotechnology,myology	1997		2004-09-20T15:47:09Z	Animal culture,Agriculture,Animal Sciences,Agriculture and Food Sciences	Italy	N	http://www.bio.unipd.it/bam/InfoforAuthors.pdf		Yes
1780-678XZ	Image and Narrative : Online Magazine of the Visual Narrative		http://www.imageandnarrative.be/	Katholieke Universiteit Leuven	English,French	1780-678X		visual narratology	2000		2004-09-21T09:59:56Z	Literature (General),Language and Literature,Languages and Literatures	Belgium	N	http://www.imageandnarrative.be/index.php/imagenarrative/about/submissions#authorGuidelines		Yes
1974-0042Z1974-0050	Musica e Tecnologia		http://www.fupress.net/index.php/mt	Firenze University Press	Italian,English	1974-0042	1974-0050	music and technology,electronic music	2007		2010-03-12T12:25:11Z	Music,Music and books on Music,Music,Arts and Architecture	Italy	N	http://www.fupress.net/index.php/mt/about/submissions#onlineSubmissions		Yes
0004-5772Z	Journal of the Association of Physicians of India	JAPI	http://www.japi.org/	Association of Physicians of India	English	0004-5772		medicine	2003		2004-02-27T12:59:10Z	Medicine (General),Medicine,Medicine (General),Health Sciences	India	NY			Yes
2154-8927Z	E-Journal of Organizational Learning and Leadership		http://www.leadingtoday.org/weleadinlearning/index.html	weLEAD Inc., Ohio	English	2154-8927		organizational learning,leadership	2002		2004-03-03T12:37:49Z	Education (General),Education,Education,Social Sciences	United States	N	http://www.leadingtoday.org/weleadinlearning/article_submission.htm		Yes
1300-7777Z1308-5263	Turkish Journal of Hematology		http://www.tjh.com.tr/	Galenos Yayinevi	English	1300-7777	1308-5263	hematology,hematologic diseases,laboratory analyses,clinical research,experimental research	1999		2004-03-11T16:26:40Z	Diseases of the blood and blood-forming organs,Specialties of internal medicine,Internal medicine,Medicine,Internal medicine,Medicine (General),Health Sciences	Turkey	N	http://www.tjh.com.tr/page.aspx?s=Instructions		Yes
1341-1357Z1881-7122	Experimental Animals		http://www.jstage.jst.go.jp/browse/expanim	Japanese Association for Laboratory Animal Science	English	1341-1357	1881-7122	animal science,experimental animals	1995		2004-03-19T14:24:07Z	Animal culture,Agriculture,Animal Sciences,Agriculture and Food Sciences	Japan	Y	https://www.jstage.jst.go.jp/jstage/pub/expanim/pdf/regulation_en.pdf		Yes
0065-1400Z1689-0035	Acta Neurobiologiae Experimentalis		http://www.ane.pl/	Nencki Institute of Experimental Biology and Polish Neuroscience Society, PTBUN	English	0065-1400	1689-0035	neuroscience,brain research,experimental biology	1970		2004-03-19T15:02:19Z	Neurology. Diseases of the nervous system,Neurosciences. Biological psychiatry. Neuropsychiatry,Internal medicine,Medicine,Neurology,Medicine (General),Health Sciences,Biology (General),Science,Biology,Biology and Life Sciences	Poland	N	http://www.ane.pl/res/instr_for_authors.pdf		Yes
1942-0013Z	Electronic-Liquid Crystal Communications (e-LC)		http://www.e-lc.org/	Kent State University	English	1942-0013		liquid crystals,soft condensed matter	2003		2004-03-25T14:07:32Z	Physics,Science,Physics (General),Physics and Astronomy	United States	N	http://www.e-lc.org/instructions.html		Yes
1211-4286Z1805-9694	Acta Medica	Hradec Kralove	https://www.lfhk.cuni.cz/Acta-Medica/	Vydavatelstvi Karolinum	English	1211-4286	1805-9694	medicine	1997		2004-03-30T12:05:44Z	Medicine (General),Medicine,Medicine (General),Health Sciences	Czech Republic	N	https://www.lfhk.cuni.cz/getattachment/6b952112-52e6-402a-966b-5d5be52ea4c8/Instructions-to-authors.aspx/		Yes
1232-1966Z1898-2263	Annals of Agricultural and Environmental Medicine		http://www.aaem.pl/index.html	Institute of Agricultural Medicine in Lublin	English	1232-1966	1898-2263	agriculture,environmental medicine	1997		2004-04-02T11:12:04Z	Agriculture (General),Agriculture,Agriculture (General),Agriculture and Food Sciences,Environmental sciences,Geography. Anthropology. Recreation,Environmental Sciences,Earth and Environmental Sciences	Poland	Y	http://aaem.pl/page.php?IDpage=2282&p=4		Yes
0101-3262Z1678-7110	Cadernos Cedes		http://www.scielo.br/scielo.php?script=sci_serial&pid=0101-3262&lng=en&nrm=iso	Centro de Estudos Educação e Sociedade, CEDES	Spanish,Portuguese,English	0101-3262	1678-7110	society	1997		2004-04-06T14:16:12Z	Education (General),Education,Education,Social Sciences,Sociology (General),Social Sciences,Sociology,Social Sciences	Brazil	N	http://www.scielo.br/revistas/ccedes/iinstruc.htm	by-nc	Yes
0102-8650Z1678-2674	Acta Cirurgica Brasileira		http://www.scielo.br/scielo.php/script_sci_serial/lng_en/pid_0102-8650/nrm_iso	Sociedade Brasileira para o Desenvolvimento da Pesquisa em Cirurgia	English,Portuguese	0102-8650	1678-2674	health sciences	1997		2004-04-23T21:31:00Z	Surgery,Medicine,Surgery,Medicine (General),Health Sciences	Brazil	N	http://www.scielo.br/revistas/acb/iinstruc.htm	by-nc	Yes
0101-2061Z1678-457X	Ciência e Tecnologia de Alimentos		http://www.scielo.br/cta	Sociedade Brasileira de Ciência e Tecnologia de Alimentos	English,Portuguese,Spanish	0101-2061	1678-457X	agricultural sciences,exact and earth sciences	1997		2004-04-23T21:31:00Z	Agriculture (General),Agriculture,Agriculture (General),Agriculture and Food Sciences,Nutrition. Foods and food supply,Home economics,Technology,Nutrition and Food Sciences,Agriculture and Food Sciences	Brazil	Y	http://www.scielo.br/revistas/cta/iinstruc.htm	by-nc	Yes
0102-0536Z	Horticultura Brasileira		http://www.scielo.br/scielo.php/script_sci_serial/pid_0102-0536/lng_en/nrm_iso	Associação Brasileira de Olericultura	English,Spanish,Portuguese	0102-0536		agricultural sciences,biological sciences	1999		2004-04-23T21:31:00Z	Plant culture,Agriculture,Plant Sciences,Agriculture and Food Sciences	Brazil	N	http://www.scielo.br/revistas/hb/iinstruc.htm	by-nc	Yes
0073-4721Z1678-4766	Iheringia. Série Zoologia		http://www.scielo.br/isz	Fundação Zoobotânica do Rio Grande do Sul	English,Portuguese,Spanish	0073-4721	1678-4766	biological sciences	2000		2004-04-23T21:31:00Z	Zoology,Science,Zoology,Biology,Biology and Life Sciences	Brazil	N	http://www.scielo.br/revistas/isz/iinstruc.htm	by-nc	Yes
1676-2444Z1678-4774	Jornal Brasileiro de Patologia e Medicina Laboratorial		http://www.scielo.br/scielo.php/script_sci_serial/pid_1676-2444/lng_en/nrm_iso	Sociedade Brasileira de Patologia Clínica	English,Portuguese	1676-2444	1678-4774	health sciences	2001		2004-04-23T21:31:00Z	Pathology,Medicine,Pathology,Medicine (General),Health Sciences	Brazil	N	http://www.scielo.br/revistas/jbpml/iinstruc.htm	by-nc	Yes
0104-9313Z1678-4944	Mana		http://www.scielo.br/mana	Universidade Federal do Rio de Janeiro	Portuguese	0104-9313	1678-4944	human sciences	1996		2004-04-23T21:31:00Z	Anthropology,Geography. Anthropology. Recreation,Anthropology,Social Sciences	Brazil	N	http://www.scielo.br/revistas/mana/iinstruc.htm	by-nc	Yes
0104-1428Z1678-5169	Polímeros		http://www.scielo.br/scielo.php/script_sci_serial/pid_0104-1428/lng_pt/nrm_iso	Associação Brasileira de Polímeros	Portuguese	0104-1428	1678-5169	exact and earth sciences	1997		2004-04-23T21:31:01Z	Chemical technology,Technology,Chemical Technology,Technology and Engineering	Brazil	N	http://www.scielo.br/revistas/po/iinstruc.htm		Yes
0100-3984Z1678-7099	Radiologia Brasileira		http://www.scielo.br/scielo.php/script_sci_serial/pid_0100-3984/lng_en/nrm_iso	Colégio Brasileiro de Radiologia	Portuguese	0100-3984	1678-7099	health sciences	2001		2004-04-23T21:31:01Z	Medical physics. Medical radiology. Nuclear medicine,Medicine (General),Medicine,Internal medicine,Medicine (General),Health Sciences	Brazil	N	http://www.scielo.br/revistas/rb/pinstruc.htm	by-nc	Yes
1516-635XZ1806-9061	Revista Brasileira de Ciência Avícola	Brazilian Journal of Poultry Science	http://www.scielo.br/scielo.php?script=sci_serial&pid=1516-635X&lng=en&nrm=iso	Fundação APINCO de Ciência e Tecnologia Avícolas	English,Spanish,Portuguese	1516-635X	1806-9061	agricultural sciences	2000		2004-04-23T21:31:01Z	Agriculture (General),Agriculture,Agriculture (General),Agriculture and Food Sciences	Brazil	Y	http://www.scielo.br/revistas/rbca/iinstruc.htm		Yes
0102-6909Z	Revista Brasileira de Ciências Sociais		http://www.scielo.br/scielo.php?script=sci_serial&pid=0102-6909&lng=en&nrm=iso	Associação Nacional de Pós-Graduação e Pesquisa em Ciências Sociais - ANPOCS	Portuguese	0102-6909		human sciences	1997		2004-04-23T21:31:01Z	Social sciences (General),Social Sciences,Social Sciences	Brazil	N	http://www.scielo.br/revistas/rbcsoc/iinstruc.htm	by-nc	Yes
0034-7140Z1806-9134	Revista Brasileira de Economia		http://www.scielo.br/scielo.php/script_sci_serial/pid_0034-7140/lng_en/nrm_iso	Fundação Getúlio Vargas	English,Portuguese	0034-7140	1806-9134	applied social sciences	1999		2004-04-23T21:31:01Z	Economic theory. Demography,Social Sciences,Economics,Business and Economics	Brazil	N	http://www.scielo.br/revistas/rbe/pinstruc.htm	by-nc	Yes
0100-2945Z1806-9967	Revista Brasileira de Fruticultura		http://www.scielo.br/scielo.php/script_sci_serial/pid_0100-2945/lng_pt/nrm_iso	Sociedade Brasileira de Fruticultura	Portuguese,English	0100-2945	1806-9967	agricultural sciences	2001		2004-04-23T21:31:01Z	Plant culture,Agriculture,Plant Sciences,Agriculture and Food Sciences	Brazil	N	http://www.scielo.br/revistas/rbf/iinstruc.htm	by-nc	Yes
0102-0188Z1806-9347	Revista Brasileira de História	RBH	http://www.scielo.br/scielo.php/script_sci_serial/pid_0102-0188/lng_pt/nrm_iso	Associação Nacional de História - ANPUH	Spanish,Portuguese	0102-0188	1806-9347	human sciences	1997		2004-04-23T21:31:01Z	America,History America,History,History and Archaeology	Brazil	N	http://www.scielo.br/revistas/rbh/iinstruc.htm	by-nc	Yes
1516-3598Z1806-9290	Revista Brasileira de Zootecnia		http://www.scielo.br/scielo.php/script_sci_serial/pid_1516-3598/lng_pt/nrm_iso	Sociedade Brasileira de Zootecnia	Portuguese,English	1516-3598	1806-9290	agricultural sciences	1999		2004-04-23T21:31:01Z	Animal culture,Agriculture,Animal Sciences,Agriculture and Food Sciences	Brazil	N	http://www.scielo.br/revistas/rbz/pinstruc.htm	by-nc	Yes
0037-8682Z1678-9849	Revista da Sociedade Brasileira de Medicina Tropical	Jornal Brasileiro de Medicina Tropical	http://www.scielo.br/scielo.php/script_sci_serial/pid_0037-8682/lng_pt/nrm_iso	Sociedade Brasileira de Medicina Tropical - SBMT	Portuguese	0037-8682	1678-9849	health sciences	1997		2004-04-23T21:31:01Z	Medicine (General),Medicine,Medicine (General),Health Sciences	Brazil	N	http://www.scielo.br/revistas/rsbmt/iinstruc.htm	by-nc	Yes
1415-5273Z1678-9865	Revista de Nutrição		http://www.scielo.br/rn	Pontifícia Universidade Católica de Campinas	Portuguese,Spanish,English	1415-5273	1678-9865	health sciences	1997		2004-04-23T21:31:01Z	Nutrition. Foods and food supply,Home economics,Technology,Nutrition and Food Sciences,Agriculture and Food Sciences	Brazil	N	http://www.scielo.br/revistas/rn/iinstruc.htm	by-nc	Yes
0101-6083Z1806-938X	Revista de Psiquiatria Clínica		http://www.scielo.br/rpc	Universidade de São Paulo	Portuguese	0101-6083	1806-938X	human sciences	2003		2004-04-23T21:31:01Z	Psychiatry,Neurology. Diseases of the nervous system,Neurosciences. Biological psychiatry. Neuropsychiatry,Internal medicine,Medicine,Psychiatry,Medicine (General),Health Sciences	Brazil	N	http://www.scielo.br/revistas/rpc/iinstruc.htm	by-nc	Yes
0034-8910Z1518-8787	Revista de Saúde Pública		http://www.scielo.br/scielo.php?script=sci_serial&pid=0034-8910&lng=en&nrm=iso	Universidade de São Paulo	English,Spanish,Portuguese	0034-8910	1518-8787	biological sciences,health sciences	1967		2004-04-23T21:31:01Z	Public aspects of medicine,Medicine,Public Health,Health Sciences	Brazil	N	http://www.scielo.br/revistas/rsp/pinstruc.htm	by-nc	Yes
0036-4665Z1678-9946	Revista do Instituto de Medicina Tropical de São Paulo		http://www.scielo.br/rimtsp	Instituto de Medicina Tropical	English,Portuguese,Spanish	0036-4665	1678-9946	biological sciences,health sciences	1987		2004-04-23T21:31:01Z	Medicine (General),Medicine,Medicine (General),Health Sciences	Brazil	N	http://www.scielo.br/revistas/rimtsp/iinstruc.htm	by-nc	Yes
0716-1840Z0718-0462	Atenea		http://www.redalyc.org/revista.oa?id=328	Universidad de Concepción	Spanish	0716-1840	0718-0462	human sciences	2003		2004-04-23T21:31:01Z	Literature (General),Language and Literature,Languages and Literatures,Arts in general,Fine Arts,Arts in general,Arts and Architecture	Chile	N	http://redalyc.org/redalyc/media/normas/normcol328.html		Yes
0970-9371Z0974-5165	Journal of Cytology		http://www.jcytol.org/	Medknow Publications	English	0970-9371	0974-5165	gynaecological cytology,non-gynaecological cytology,cytochemistry,immunocytochemistry,electron microscopy,molecular cytopathology	2007		2008-03-18T16:29:49Z	Cytology,Biology (General),Science,Cytology,Biology,Biology and Life Sciences	India	N	http://www.jcytol.org/contributors.asp	by-nc-sa	Yes
0972-0707Z0974-5203	Journal of Conservative Dentistry		http://www.jcd.org.in/	Medknow Publications	English	0972-0707	0974-5203	conservative dentistry,dental materials,endodontics	2005		2009-03-30T12:46:09Z	Dentistry,Medicine,Dentistry,Health Sciences	India	N	http://www.jcd.org.in/contributors.asp	by-nc-sa	Yes
1535-7597Z1535-7511	Epilepsy Currents		http://www.pubmedcentral.nih.gov/tocrender.fcgi?journal=201&action=archive	Blackwell	English	1535-7597	1535-7511	medical sciences,neurology	2001		2002-10-06T12:07:04Z	Neurosciences. Biological psychiatry. Neuropsychiatry,Internal medicine,Medicine,Neurology,Medicine (General),Health Sciences	United States	NY			Yes
0280-6495Z1600-0870	Tellus A		http://www.tellusa.net/index.php/tellusa/index	Co-Action Publishing	English	0280-6495	1600-0870	numerical weather prediction,climate dynamics,climate modelling,oceanography	2012		2012-01-11T15:15:05Z	Meteorology. Climatology,Physics,Science,Meteorology and Climatology,Earth and Environmental Sciences	Sweden	Y	http://tellusa.net/index.php/tellusa/about/editorialPolicies#custom-1	by-nc	Yes
1645-9199Z	Relações Internacionais	R:I	http://www.scielo.oces.mctes.pt/scielo.php/script_sci_serial/pid_1645-9199/lng_pt/nrm_iso	Universidade Nova de Lisboa	Portuguese	1645-9199		political science,international relations	2008		2009-11-27T14:06:02Z	International relations,Political science,Political Science,Law and Political Science	Portugal	NY	http://www.scielo.oces.mctes.pt/revistas/ri/pinstruc.htm		Yes
1450-698XZ	Serbian Astronomical Journal		http://saj.matf.bg.ac.rs/	Astronomical Observatory, Department of Astronomy, Belgrade	English	1450-698X		astrophysics,astrobiology,space sciences	1998		2008-12-04T11:16:18Z	Astronomy,Science,Astronomy (General),Physics and Astronomy	Serbia	N	http://saj.matf.bg.ac.rs/right.html#authors		Yes
2220-5772Z	International Journal of Bahamian Studies		http://journals.sfu.ca/cob/index.php/files/index	College of the Bahamas	English	2220-5772		Bahamas,Caribbean region	2010		2011-01-25T12:47:14Z	General Works,Multidisciplinary,General Works	Bahamas	N	http://journals.sfu.ca/cob/index.php/files/about/submissions#authorGuidelines	by	Yes
0029-196XZ1502-5322	Norwegian Journal of Geology	Norsk Geologisk Tidsskrift	http://geologi.imaker.no/cgi-bin/geologi/imaker?id=3996&visdybde=1&aktiv=3996	Norwegian Geological Society (Norsk Geologisk Forening, NGF)	English	0029-196X	1502-5322	geoscience,Norway,Scandinavia,North Atlantic	2003		2002-06-21T08:43:19Z	Geology,Science,Earth Sciences,Earth and Environmental Sciences	Norway	N	http://geologi.imaker.no/cgi-bin/geologi/imaker?id=4375&visdybde=1&aktiv=4375		Yes
1076-1551Z1528-3658	Molecular Medicine		http://www.molmed.org/	The Feinstein Institute for Medical Research	English	1076-1551	1528-3658	molecular,pathogenesis,cellular	2000		2002-05-01T20:13:47Z	Biochemistry,Organic chemistry,Chemistry,Science,Biochemistry,Life Sciences,Biology and Life Sciences,Therapeutics. Pharmacology,Medicine,Therapeutics,Medicine (General),Health Sciences	United States	N	http://molmed.org/journal/authors		Yes
1519-7530Z	Revista Brasileira de Paleontologia		http://www.sbpbrasil.org/revista_english/index.htm	Sociedade Brasileira de Paleontologia	English,Spanish,Portuguese	1519-7530		palaeontology	2004		2009-02-18T09:30:50Z	Paleontology,Geology,Science,Geology,Earth and Environmental Sciences	Brazil	N	http://www.sbpbrasil.org/revista_english/instructions.pdf		Yes
0256-4602Z0974-5971	IETE Technical Review		http://www.tr.ietejournals.org/	Medknow Publications	English	0256-4602	0974-5971	electronics,telecommunications engineering,current and futuristic technologies	2008		2009-03-31T12:52:08Z	Engineering (General). Civil engineering (General),Technology,General and Civil Engineering,Technology and Engineering	India	N	http://www.tr.ietejournals.org/contributors.asp	by-nc-sa	Yes
1028-2092Z	Bangladesh Journal of Plant Taxonomy		http://www.banglajol.info/index.php/BJPT	Bangladesh Association of Plant Taxonomists	English	1028-2092		plant,taxonomy,conservation,systematics,ethnobotany	2005		2009-04-03T16:09:49Z	Botany,Science,Botany,Biology,Biology and Life Sciences	Bangladesh	N	http://www.banglajol.info/index.php/BJPT/about/submissions#authorGuidelines		Yes
1022-6508Z1681-5653	Revista Iberoamericana de Educación	RIE	http://www.rieoei.org	Organización de Estados Iberoamericanos para la Educación, la Ciencia y la Cultura	Spanish,Portuguese	1022-6508	1681-5653	Ibero-America,educational strategy,educational policy	1993		2007-01-25T16:13:55Z	Special aspects of education,Education,Education,Social Sciences	Spain	N	http://www.rieoei.org/formulario_colaboraciones.php		Yes
1696-1277Z	Circunstancia		http://www.ortegaygasset.edu/contenidos.asp?id_s=54	Instituto Universitario de Investigación Ortega y Gasset	Spanish,English	1696-1277		social sciences,philosophy,economy,humanities,history	2003		2007-02-01T14:20:20Z	Economic theory. Demography,Social Sciences,Economics,Business and Economics,Social sciences (General),Social Sciences,Social Sciences	Spain	N	http://www.ortegaygasset.edu/descargas/contenidos/Circunstancia%20-%20Normas%20para%20el%20env%C3%ADo%20de%20origninales.pdf		Yes
1699-4949Z	Çédille : Revista de Estudios Franceses		http://webpages.ull.es/users/cedille/	Asociación de Profesores de Francés de la Universidad Española	Spanish,French	1699-4949		French studies,French literature,French linguistics	2005		2007-02-05T18:15:46Z	French literature - Italian literature - Spanish literature - Portuguese literature,Language and Literature,Languages and Literatures	Spain	Y	http://webpages.ull.es/users/cedille/normas.htm	by	Yes
1870-7459Z	HUITZIL : Journal of Mexican Ornithology		http://www.huitzil.net	Sociedad para el estudio y conservacion de las aves	Spanish,English,French	1870-7459		birds,Mexico,new bird registers	2000		2007-02-19T17:50:08Z	Zoology,Science,Zoology,Biology,Biology and Life Sciences	Mexico	N	http://www.huitzil.net/nuevo_sitio/norma_edit.htm		Yes
1796-2021Z	Journal of Communications		http://www.jocm.us/	Engineering and Technology Publishing	English	1796-2021		journal communication,telecommunication,network	2006		2007-02-21T11:54:44Z	Telecommunication,Electrical engineering. Electronics. Nuclear engineering,Technology,Media and communication,Social Sciences	United States	Y	http://www.jocm.us/index.php?m=content&c=index&a=lists&catid=13		Yes
1687-5443Z	Neural Plasticity		http://www.hindawi.com/journals/np/	Hindawi Publishing Corporation	English	1687-5443		behavioral neuroscience,cognitive neuroscience,biological psychology,biological psychiatry	2007		2007-02-27T16:12:14Z	Neurosciences. Biological psychiatry. Neuropsychiatry,Internal medicine,Medicine,Neurology,Medicine (General),Health Sciences	Egypt	Y	http://www.hindawi.com/journals/np/apc/	by	Yes
1544-7529Z1544-7537	Information Technologies and International Development	ITID	http://itidjournal.org/itid	University of Southern California	English	1544-7529	1544-7537	ICT,IT,technology,communications	2003		2007-02-28T08:56:39Z	Economic growth, development, planning,Industries. Land use. Labor,Social Sciences,Economics,Business and Economics,Information technology,Industrial engineering. Management engineering,Technology (General),Technology,Computer Science,Technology and Engineering	United States	N	http://itidjournal.org/itid/about/submissions#authorGuidelines		Yes
1750-1164Z	Annals of Surgical Innovation and Research		http://www.asir-journal.com/	BioMed Central	English	1750-1164		surgery,surgical research	2007		2007-03-06T08:58:19Z	Surgery,Medicine,Surgery,Medicine (General),Health Sciences	United Kingdom	Y	http://www.asir-journal.com/about#apc	by	Yes
1753-5794Z	49th Parallel : an Interdisciplinary Journal of North America		http://www.49thparallel.bham.ac.uk/	University of Birmingham	English	1753-5794		media,cultural studies,political studies,North-America	1999		2007-03-12T11:03:55Z	America,History America,History,History and Archaeology	United Kingdom	N	http://www.49thparallel.bham.ac.uk/submissions.htm		Yes
1753-9854Z	Tate Papers		http://www.tate.org.uk/research/tateresearch/tatepapers/	Tate	English	1753-9854		arts,painting	2004		2007-03-13T16:49:40Z	Arts in general,Fine Arts,Arts in general,Arts and Architecture	United Kingdom	N	http://www.tate.org.uk/about/our-work/tate-research/contribute-tate-papers		Yes
1135-6618Z1885-8031	Revista de Estudios Cooperativos	REVESCO	http://www.ucm.es/info/revesco/index_e.php	AECOOP Escuela de Estudios Cooperativos	Spanish	1135-6618	1885-8031	social economy,participation companies,economic democracy,industrial democracy	1963		2007-03-19T14:21:38Z	Social sciences (General),Social Sciences,Social Sciences	Spain	N	http://www.ucm.es/info/revesco/normas_e.php		Yes
1782-2041Z	Bulletin d'Analyse Phénoménologique		http://popups.ulg.ac.be/bap.htm	University of Liège	French	1782-2041		phenomenology,critical philosophy,metaphysics	2005		2007-03-20T11:45:10Z	Philosophy (General),Philosophy. Psychology. Religion,Philosophy,Philosophy and Religion	Belgium	N	http://popups.ulg.ac.be/bap_eng.htm#instr		Yes
1752-153XZ	Chemistry Central Journal		http://journal.chemistrycentral.com/home/	BioMed Central	English	1752-153X		chemistry,materials science	2007		2007-03-20T16:50:43Z	Chemistry,Science,Chemistry (General),Chemistry	United Kingdom	Y	http://journal.chemistrycentral.com/about#apc	by	Yes
1886-516XZ	Revista de Métodos Cuantitativos para la Economía y la Empresa	Journal of Quantitative Methods for Economics and Business Administration	http://www.upo.es/RevMetCuant/	Pablo de Olavide University	English,Spanish	1886-516X		mathematics,statistics,business,economy	2006		2007-03-21T17:31:53Z	Business,Commerce,Social Sciences,Business and Management,Business and Economics,Mathematics,Science,Mathematics,Mathematics and Statistics	Spain	N	http://www.upo.es/RevMetCuant/autores.htm	by-nc-nd	Yes
0185-1101Z	Revista Mexicana de Astronomía y Astrofísica : Universidad Nacional Autónoma de México. Instituto de Astronomía		http://www.redalyc.org/revista.oa?id=571	Universidad Nacional Autónoma de México	English	0185-1101		astronomy,astrophysics	2000		2007-03-23T09:42:48Z	Astronomy,Science,Astronomy (General),Physics and Astronomy	Mexico	Y	http://redalyc.org/redalyc/media/normas/normcol571.html		Yes
0204-2061Z	Knygotyra		http://www.leidykla.eu/mokslo-darbai/knygotyra/	Vilnius University Press	Lithuanian,English	0204-2061		book science,book culture,publishing,archival studies,library science	2000		2007-03-26T10:57:49Z	Bibliography. Library science. Information resources,Library and Information Science,Social Sciences	Lithuania	N	http://www.leidykla.eu/fileadmin/Knygotyra/47/Dear_authors_of__Knygotyra_.pdf		Yes
1705-9232Z	Journal of Knowledge Management Practice	JKMP	http://www.tlainc.com/jkmp.htm	The Leadership Alliance Inc.	English	1705-9232		knowledge management,learning	1998		2007-03-27T17:34:26Z	Commerce,Social Sciences,Business and Management,Business and Economics	Canada	N	http://www.tlainc.com/submit.htm		Yes
1886-1350Z1887-3987	PNA	PNA : Revista de Investigación en Didáctica de la Matemática	http://www.pna.es/	Pensamiento Numérico	Spanish,English	1886-1350	1887-3987	mathematics teaching,mathematics learning	2006		2007-04-10T13:47:14Z	Education (General),Education,Education,Social Sciences,Mathematics,Science,Mathematics,Mathematics and Statistics	Spain	N	http://www.pna.es/otros/EnvioManuscritos.html	by-nc-nd	Yes
1306-3030Z	International Electronic Journal of Mathematics Education	IEJME	http://www.iejme.com	Gokkusagi Ltd.	English	1306-3030		mathematics teaching,mathematics learning	2006		2007-04-10T16:39:03Z	Education (General),Education,Education,Social Sciences,Mathematics,Science,Mathematics,Mathematics and Statistics	Turkey	N	http://www.iejme.com/manuscript.htm		Yes
0037-6787Z1336-2364	Slavica Slovaca		http://slavu.sav.sk/	Slavistický ústav Jána Stanislava SAV	all Slavic languages,English,German,French	0037-6787	1336-2364	slavistics,philology	1997		2007-04-12T18:37:04Z	Philology. Linguistics,Language and Literature,Linguistics,Languages and Literatures,Literature (General),Language and Literature,Languages and Literatures	Slovakia	N			Yes
1729-4649Z	Taiwan Journal of Linguistics		http://tjl.nccu.edu.tw/	Crane Publishing Co	English	1729-4649		general linguistics	2003		2007-04-13T15:40:07Z	Philology. Linguistics,Language and Literature,Linguistics,Languages and Literatures	Taiwan	N	http://ling.nccu.edu.tw/RedBug/tjl/RB_tjl.htm		Yes
2314-6745Z2314-6753	Journal of Diabetes Research		http://www.hindawi.com/journals/jdr/	Hindawi Publishing Corporation	English	2314-6745	2314-6753	diabetes mellitus,pathogenesis	2013		2013-04-09T16:17:09Z	Internal medicine,Medicine,Internal medicine,Medicine (General),Health Sciences	Egypt	Y	http://www.hindawi.com/journals/jdr/apc/		Yes
0563-3745Z1591-0725	Thalassia Salentina		http://siba-ese.unisalento.it/index.php/thalassiasal	Università di Lecce	Italian,French,German,English	0563-3745	1591-0725	marine biology,ecology,marine environmental research	1966		2007-04-17T15:36:53Z	Biology (General),Science,Biology,Biology and Life Sciences	Italy	N	http://siba-ese.unisalento.it/index.php/thalassiasal/about/submissions#onlineSubmissions		Yes
1846-887XZ1845-9757	Financial Theory and Practice		http://www.ijf.hr/eng/publications/serial-publications/12/financial-theory-and-practice/215/	Institute of Public Finance	Croatian,English	1846-887X	1845-9757	public sector economics,economic growth and development,transition to market economy,EU integration	2005		2007-04-18T13:23:13Z	Economic theory. Demography,Social Sciences,Economics,Business and Economics	Croatia	N	http://www.fintp.hr/en/for-contributors/		Yes
1840-0132Z1840-2445	Medicinski Glasnik		http://www.ljkzedo.com.ba/index.php/past-issues	Medical Association of Zenica-Doboj Canton	Bosnian,Croatian,Serbian,English	1840-0132	1840-2445	biomedicine,clinical medicine,basic medicine,health	2004		2007-04-19T13:44:37Z	Medicine (General),Medicine,Medicine (General),Health Sciences	Bosnia	Y	http://www.ljkzedo.com.ba/index.php/instructions-to-authors	by-nc-nd	Yes
1750-5968Z	Journal of Information Literacy		http://ojs.lboro.ac.uk/ojs/index.php/JIL/index	Chartered Institute of Library and Information Professionals	English	1750-5968		librarianship	2007		2007-04-20T13:30:40Z	Bibliography. Library science. Information resources,Library and Information Science,Social Sciences	United Kingdom	N	http://ojs.lboro.ac.uk/ojs/index.php/JIL/about/submissions#authorGuidelines		Yes
0026-704XZ1846-4025	Mljekarstvo	Dairy	http://hrcak.srce.hr/index.php?show=casopis&id_casopis=33	Croatian Dairy Union	English,Croatian	0026-704X	1846-4025	agronomy,biotechnology,food technology,dairy products	2001		2007-04-24T10:00:34Z	Animal culture,Agriculture,Animal Sciences,Agriculture and Food Sciences,Biotechnology,Chemical technology,Technology,Biotechnology,Life Sciences,Biology and Life Sciences	Croatia	N	http://hrcak.srce.hr/upute/upute_autorima_Mljekarstvo.pdf	by-nd	Yes
1330-0962Z1846-7482	Biochemia Medica		http://www.biochemia-medica.com/	Medicinska naklada, Zagreb	English,Croatian	1330-0962	1846-7482	biomedicine,biochemistry,laboratory diagnostics	2006		2007-04-24T17:40:47Z	Biochemistry,Organic chemistry,Chemistry,Science,Biochemistry,Life Sciences,Biology and Life Sciences,Medicine (General),Medicine,Medicine (General),Health Sciences	Croatia	N	http://hrcak.srce.hr/upute/guide_authors_Biochemia_Medica.pdf		Yes
0469-6255Z	Naše More : Journal of Marine Sciences	Naše more: znanstveni časopis za more i pomorstvo	http://hrcak.srce.hr/index.php?lang=hr&show=casopis&id_casopis=126	University of Dubrovnik	Croatian,English	0469-6255		shipping,engineering,biotechnology,economy,law	2003		2007-04-25T11:41:31Z	Transportation and communications,Social Sciences,Transportation,Technology and Engineering	Croatia	N	http://hrcak.srce.hr/upute/guide_authors_Nae_more_journal_of_marine_sciences.doc		Yes
1933-5954Z	Communications in Information Literacy	CIL	http://www.comminfolit.org	Communications in Information Literacy	English	1933-5954		information literacy research	2007		2007-05-16T16:03:44Z	Bibliography. Library science. Information resources,Library and Information Science,Social Sciences	United States	N	http://www.comminfolit.org/index.php?journal=cil&page=about&op=submissions#authorGuidelines		Yes
0940-5585Z1863-639X	Nordeuropaforum	Zeitschrift für Politik, Wirtschaft und Kultur	http://www.nordeuropaforum.de	Humboldt-Universität zu Berlin	German,English	0940-5585	1863-639X	Scandinavian studies,Baltic region	2006		2007-05-23T16:48:51Z	History (General),History (General) and history of Europe,History,History and Archaeology,Political science (General),Political science,Political Science,Law and Political Science	Germany	N	http://www2.hu-berlin.de/skan/publ/publikationsreihen/nofo/english/autoren_reload.htm		Yes
1682-6957Z	Iranian Journal of Physics Research		http://ijpr.iut.ac.ir/	Isfahan University of Technology	English,Persian	1682-6957		physics,astronomy,theoretical physics	1996		2007-05-28T13:38:53Z	Physics,Science,Physics (General),Physics and Astronomy	Iran	N			Yes
1176-9343Z	Evolutionary Bioinformatics	Evolutionary Bioinformatics Online	http://la-press.com/journal.php?journal_id=17	Libertas Academica	English	1176-9343		evolution,bioinformatics,biology informatics	2005		2007-05-28T13:50:06Z	Biology (General),Science,Biology,Biology and Life Sciences	New Zealand	Y	http://www.la-press.com/author_resources.php?folder_id=121	by	Yes
1409-4703Z	Revista Electrónica Actualidades Investigativas en Educación		http://revista.inie.ucr.ac.cr/	Universidad de Costa Rica	Spanish,English	1409-4703		pedagogy	2001		2006-02-03T13:14:19Z	Education (General),Education,Education,Social Sciences	Costa Rica	N	http://revista.inie.ucr.ac.cr/criterios-publicacion.html	by-nc-nd	Yes
0771-3312Z	Tropicultura		http://www.tropicultura.org/	Agri-Overseas	English,French,Spanish,Dutch	0771-3312		tropical agriculture,veterinary sciences,food sciences,environmental sciences,socio-economy,plant production	1983		2006-02-07T13:14:11Z	General Works,Multidisciplinary,General Works	Belgium	N	http://www.tropicultura.org/eng/home/instruction.html		Yes
1610-6261Z1610-6253	IABLIS : Jahrbuch für Europäische Prozesse		http://www.iablis.de/	IABLIS	German	1610-6261	1610-6253	cultural sciences,philosophy,fine arts	2002		2006-02-07T14:46:49Z	General Works,Multidisciplinary,General Works	Germany	N	http://www.iablis.de/iablis_t/a/tt.html		Yes
1712-6568Z	Avian Conservation and Ecology	Écologie et conservation des oiseaux	http://www.ace-eco.org/	Resilience Alliance	English	1712-6568		ecology,ornithology,avian science	2005		2006-02-07T15:23:06Z	Zoology,Science,Zoology,Biology,Biology and Life Sciences,Ecology,Biology (General),Science,Ecology,Earth and Environmental Sciences	Canada	Y	http://www.ace-eco.org/policies.php#other_1		Yes
1132-2799Z	Revista Galega de Economía		http://www.redalyc.org/revista.oa?id=391	Universidade de Santiago de Compostela	Galician,Spanish	1132-2799		economics,Galicia	2000		2006-02-16T11:46:52Z	Economic history and conditions,Social Sciences,Economics,Business and Economics	Spain	Y	http://redalyc.org/redalyc/media/normas/normcol391.html		Yes
1748-7188Z	Algorithms for Molecular Biology		http://www.almob.org/	BioMed Central	English	1748-7188		molecular biology,genomics	2006		2006-02-20T09:11:12Z	Genetics,Biology (General),Science,Genetics,Biology,Biology and Life Sciences,Biology (General),Science,Biology,Biology and Life Sciences	United Kingdom	Y	http://www.almob.org/info/instructions/	by	Yes
1746-9082Z	Reflecting Education		http://www.reflectingeducation.net/index.php/reflecting	University of London	English	1746-9082		educational practice,learning,teaching	2005		2006-02-21T15:38:45Z	Theory and practice of education,Education,Education,Social Sciences	United Kingdom	N	http://www.reflectingeducation.net/index.php/reflecting/about/submissions#authorGuidelines		Yes
1405-3322Z	Boletín de la Sociedad Geológica Mexicana		http://boletinsgm.igeolcu.unam.mx/	Sociedad Geológica Mexicana	Spanish,English	1405-3322		geology,earth sciences,Mexico	2005		2006-02-22T17:59:26Z	Geology,Science,Earth Sciences,Earth and Environmental Sciences	Mexico	N	http://www.geociencias.unam.mx/~alaniz/SGM/Instrucciones.htm		Yes
1687-2762Z1687-2770	Boundary Value Problems		http://www.boundaryvalueproblems.com/	Springer	English	1687-2762	1687-2770	differential equations	2005		2006-02-24T12:19:22Z	Mathematics,Science,Mathematics,Mathematics and Statistics	Germany	Y	http://www.boundaryvalueproblems.com/manuscript	by	Yes
1947-3788Z	IBIMA Business Review		http://www.ibimapublishing.com/journals/IBIMABR/ibimabr.html	IBIMA Publishing	English,French	1947-3788		knowledge management,small and medium enterprises,e-commerce	2009		2010-03-02T10:58:13Z	Business,Commerce,Social Sciences,Business and Management,Business and Economics	United States	Y	http://www.ibimapublishing.com/journals/IBIMABR/charges.html	by	Yes
1933-6837Z1555-7561	Theoretical Economics		http://econtheory.org/	Econometric Society	English	1933-6837	1555-7561	economic theory	2006		2006-03-08T11:40:45Z	Economic theory. Demography,Social Sciences,Economics,Business and Economics	United States	N	http://econtheory.org/editorial.php	by-nc	Yes
1676-2592Z	ETD : Educação Temática Digital		http://www.fae.unicamp.br/etd/	Universidade Estadual de Campinas	Portuguese,English	1676-2592		technology,media and communication	2004		2006-03-08T14:51:57Z	Education (General),Education,Education,Social Sciences,Social sciences (General),Social Sciences,Social Sciences	Brazil	N	http://www.fae.unicamp.br/revista/index.php/etd/about/submissions#authorGuidelines	by-nc	Yes
1790-3769Z	E-Perimetron		http://www.e-perimetron.org	National Centre for Maps and Cartographic Heritage	English,French	1790-3769		maps,map history,cartography,cartographic heritage	2006		2006-03-09T11:41:36Z	Maps,Geography. Anthropology. Recreation,Geography,Earth and Environmental Sciences	Greece	N	http://www.e-perimetron.org/The_journal/Contributions.htm		Yes
1806-9614Z	Animal Reproduction		http://www.cbra.org.br/portal/publicacoes/ar/editorialar.html	Brazilian College of Animal Reproduction	English	1806-9614		animal reproduction,reproductive biology	2004		2006-03-13T08:57:46Z	Animal culture,Agriculture,Animal Sciences,Agriculture and Food Sciences,Physiology,Science,Physiology,Biology,Biology and Life Sciences	Brazil	N	http://www.cbra.org.br/portal/publicacoes/ar/instructions.html		Yes
1733-5566Z	Diametros : an Online Journal of Philosophy		http://www.diametros.iphils.uj.edu.pl/?l=1	Jagiellonian University	Polish,English	1733-5566		polemics	2004		2006-03-13T10:54:20Z	Philosophy (General),Philosophy. Psychology. Religion,Philosophy,Philosophy and Religion	Poland	N	http://www.diametros.iphils.uj.edu.pl/?l=2&p=anr22&m=101		Yes
0211-1322Z1988-3196	Anales del Jardín Botánico de Madrid		http://rjb.revistas.csic.es	Consejo Superior de Investigaciones Científicas	Spanish,English	0211-1322	1988-3196	taxonomy,ecophysiology,phylogeny,phylogeography,functional morphology,plant-animal relations	1997		2006-03-14T09:23:36Z	Botany,Science,Botany,Biology,Biology and Life Sciences	Spain	N	http://rjb.revistas.csic.es/index.php/rjb/about/submissions#authorGuidelines	by-nc	Yes
1174-9210Z	Sportscience		http://sportsci.org/	University of Otago	English	1174-9210		sports	1998		2006-03-30T14:18:25Z	Sports,Recreation. Leisure,Geography. Anthropology. Recreation,Sports Science,Social Sciences	United States	N	http://www.sportsci.org/jour/infoauthors.html		Yes
0103-6513Z	Produção		http://www.scielo.br/scielo.php/script_sci_serial/pid_0103-6513/lng_en/nrm_iso	Associação Brasileira de Engenharia de Produção (ABEPRO)	Portuguese	0103-6513		production engineering,production management,quality control	1991		2006-03-31T11:45:54Z	Manufactures,Technology,Manufactures,Technology and Engineering	Brazil	N	http://www.scielo.br/revistas/prod/iinstruc.htm	by-nc	Yes
1695-288XZ	Revista Latinoamericana de Tecnología Educativa	RELATEC	http://campusvirtual.unex.es/revistas/index.php?journal=relatec	Universidad de Extremadura	Spanish,Portuguese	1695-288X		educational technology,computers in education,educational multimedia	2002		2006-04-04T13:51:03Z	Education (General),Education,Education,Social Sciences	Spain	N	http://campusvirtual.unex.es/revistas/index.php?journal=relatec&page=about&op=submissions#authorGuidelines		Yes
0120-9957Z	Revista Colombiana de Gastroenterología		http://www.scielo.org.co/scielo.php?script=sci_serial&lng=en&pid=0120-9957&nrm=iso	Asociación Colombiana de Gastroenterología	Spanish,English	0120-9957		gastroenterology,digestive endoscopy,hepatology,coloproctology	2003		2006-04-04T14:38:18Z	Diseases of the digestive system. Gastroenterology,Specialties of internal medicine,Internal medicine,Medicine,Gastroenterology,Medicine (General),Health Sciences	Colombia	N	http://www.scielo.org.co/revistas/rcg/iinstruc.htm		Yes
0120-3592Z1900-7205	Cuadernos de Administración		http://www.scielo.org.co/scielo.php?script=sci_serial&pid=0120-3592&lng=pt&nrm=iso	Pontificia Universidad Javeriana	Spanish,English	0120-3592	1900-7205	business,management,administration	2004		2006-04-04T14:51:03Z	Business,Commerce,Social Sciences,Business and Management,Business and Economics	Colombia	N	http://www.scielo.org.co/revistas/cadm/pinstruc.htm		Yes
1429-0022Z1734-2260	Medicina Sportiva		http://www.medicinasportiva.pl/new/index.php?path=aktualnosci/medicina/ms2006_01	Medicina Sportiva	English	1429-0022	1734-2260	sports medicine,sports science,physical activity	2001		2006-04-10T13:51:18Z	Sports medicine,Special situations and conditions,Internal medicine,Medicine,Sports Medicine,Medicine (General),Health Sciences	Poland	N	http://www.medicinasportiva.pl/new/index.php?path=aktualnosci/medicina/ms_instrukcja		Yes
1687-4110Z1687-4129	Journal of Nanomaterials		http://www.hindawi.com/journals/JNM	Hindawi Publishing Corporation	English	1687-4110	1687-4129	nanomaterials science,engineering,nanotechnology	2006		2006-04-18T11:54:17Z	Materials of engineering and construction. Mechanics of materials,Electrical engineering. Electronics. Nuclear engineering,Technology,Materials,Technology and Engineering	Egypt	Y	http://www.hindawi.com/journals/jnm/apc/	by	Yes
1554-3897Z	African Journal of Criminology and Justice Studies	AJCJS	http://www.umes.edu/ajcjs/	African Criminology and Justice Association	English	1554-3897		justice,african culture,African diaspora	2005		2006-04-18T14:07:22Z	History of Africa,History (General) and history of Europe,History,History and Archaeology,Social pathology. Social and public welfare. Criminology,Social Sciences,Social and Public Welfare,Sociology,Social Sciences	United States	N	http://www.umes.edu/ajcjs/default.aspx?id=155		Yes
1816-7632Z	E-Beratungsjournal	Fachzeitschrift für Online-Beratung und computervermittelte Kommunikation	http://www.e-beratungsjournal.net	e-beratungsjournal	German,English	1816-7632		online-counselling,computer-mediated communication,cyber psychology	2005		2006-04-19T09:49:35Z	Social sciences (General),Social Sciences,Social Sciences,Communication. Mass media,Philology. Linguistics,Language and Literature,Media and communication,Social Sciences	Austria	N	http://www.e-beratungsjournal.net/onlineberatung/Aktuell_files/manuskriptrichtlinien.pdf	by	Yes
1734-9338Z1897-4295	Advances in Interventional Cardiology	Postępy w kardiologii interwencyjnej	http://www.termedia.pl/magazine.php?magazine_id=35&magazine_subpage=CURRENT	Termedia Publishing House	Polish,English	1734-9338	1897-4295	cardiology	2005		2006-04-19T11:40:54Z	Diseases of the circulatory (Cardiovascular) system,Specialties of internal medicine,Internal medicine,Medicine,Cardiovascular,Medicine (General),Health Sciences	Poland	N	http://www.termedia.pl/Journal/Postepy_w_Kardiologii_Interwencyjnej-35/Dla_autorow		Yes
1641-4640Z1509-572X	Folia Neuropathologica		http://www.termedia.pl/magazine.php?magazine_id=20&magazine_subpage=CURRENT	Termedia Publishing House	English	1641-4640	1509-572X	neuropathology	2005		2006-04-19T14:21:09Z	Neurosciences. Biological psychiatry. Neuropsychiatry,Internal medicine,Medicine,Neurology,Medicine (General),Health Sciences	Poland	N	http://www.termedia.pl/Journal/Folia_Neuropathologica-20/Dla_autorow		Yes
1467-4866Z	Geochemical Transactions		http://www.geochemicaltransactions.com/	BioMed Central	English	1467-4866		geochemistry,marine and aquatic chemistry,chemical oceanography,biogeochemistry,astrobiology	2000		2006-04-21T09:46:33Z	Geology,Science,Earth Sciences,Earth and Environmental Sciences	United Kingdom	Y	http://www.geochemicaltransactions.com/about#apc	by	Yes
1708-7570Z	Revue Internationale des Technologies en Pédagogie Universitaire	International Journal of Technologies in Higher Education	http://www.ritpu.org/?lang=fr	Conférence des recteurs et principaux des universités du Québec [CREPUQ]	French,English	1708-7570		technology teaching higher education,pedagogy	2004		2006-04-21T10:01:47Z	Special aspects of education,Education,Education,Social Sciences	Canada	N	http://www.ritpu.org/spip.php?article95&lang=fr	by-nd	Yes
1618-8543Z	bwp@ Berufs- und Wirtschaftspädagogik - online		http://www.bwpat.de	bwpat Förder-Club e.V.	German	1618-8543		vocational and business education,vocational and business training	2001		2006-04-27T13:26:36Z	Special aspects of education,Education,Education,Social Sciences	Germany	N	http://www.bwpat.de/vorlagen/Hinweise_Autoren.pdf		Yes
0101-9759Z1982-3908	Anuário do Instituto de Geociências		http://www.anuario.igeo.ufrj.br/	Universidade Federal do Rio de Janeiro	Portuguese,English,French,Spanish	0101-9759	1982-3908	geology,palaeontology,geography,meteorology,climate	1977		2006-05-02T11:54:59Z	Geology,Science,Earth Sciences,Earth and Environmental Sciences	Brazil	N	http://www.anuario.igeo.ufrj.br/ingles/normas_ingles.pdf		Yes
1557-4571Z1557-458X	American Journal of Food Technology		http://scialert.net/jindex.php?issn=1557-4571	Science publications	English	1557-4571	1557-458X	nutrition,food processing	2006		2007-12-20T13:49:12Z	Food processing and manufacture,Chemical technology,Technology,Chemical Technology,Technology and Engineering	United States	Y	http://scialert.net/guide.php?issn=1557-4571		Yes
1735-143XZ1735-3408	Hepatitis Monthly		http://www.hepmon.ir	Kowsar Corporation	English	1735-143X	1735-3408	hepatitis,treatment,prevention,liver diseases	2004		2006-05-05T11:09:22Z	Diseases of the digestive system. Gastroenterology,Specialties of internal medicine,Internal medicine,Medicine,Gastroenterology,Medicine (General),Health Sciences	Iran	Y	http://kowsarcorp.com/pub/index.php/services/for-authors/429-apc		Yes
1557-4539Z1557-4547	American Journal of Plant Physiology		http://scialert.net/jindex.php?issn=1557-4539	Science publications	English	1557-4539	1557-4547	plant culture	2006		2006-05-08T13:18:18Z	Botany,Science,Botany,Biology,Biology and Life Sciences	United States	Y	http://scialert.net/guide.php?issn=1557-4539		Yes
1809-0761Z	Revista Saúde.Com	Journal of Health.com	http://www.uesb.br/revista/rsc/	Universidade Estadual do Sudoeste da Bahia	Portuguese	1809-0761		medicine,public health,nutrition,nursing,dentistry	2005		2006-05-09T15:45:54Z	Medicine (General),Medicine,Medicine (General),Health Sciences	Brazil	N	http://www.uesb.br/revista/rsc/normas.htm	by-nc-nd	Yes
1687-2215Z	Cybrarians Journal		http://www.cybrarians.info/journal	cybrarians, Cairo	Arabic,English	1687-2215		librarianship,information science,archives,libraries	2004		2006-05-17T12:27:49Z	Bibliography. Library science. Information resources,Library and Information Science,Social Sciences	Egypt	N			Yes
1550-2783Z	Journal of the International Society of Sports Nutrition	JISSN	http://www.jissn.com/	BioMed Central	English	1550-2783		sports nutrition,nutrition science,dietary supplements,exercise metabolism	2004		2004-09-27T12:22:11Z	Sports,Recreation. Leisure,Geography. Anthropology. Recreation,Sports Science,Social Sciences,Nutrition. Foods and food supply,Home economics,Technology,Nutrition and Food Sciences,Agriculture and Food Sciences	United States	Y	http://www.jissn.com/info/instructions/	by	Yes
2245-1919Z	Danish Medical Journal		http://www.danmedj.dk/portal/page/portal/danmedj.dk/dmj_forside	Danish Medical Association	English	2245-1919		medicine,health science	2012		2013-08-03T15:20:47Z	Medicine (General),Medicine,Medicine (General),Health Sciences	Denmark	CON	http://www.danmedj.dk/portal/page/portal/danmedj.dk/about		Yes
1449-0471Z	Philament : An Online Journal of the Arts and Culture		http://www.arts.usyd.edu.au/publications/philament/index.htm	University of Sydney	English	1449-0471		cultural studies,literary arts	2003		2004-10-04T16:04:15Z	Social sciences (General),Social Sciences,Social Sciences,Arts in general,Fine Arts,Arts in general,Arts and Architecture,Literature (General),Language and Literature,Languages and Literatures	Australia	N	http://www.arts.usyd.edu.au/publications/philament/submissions.htm		Yes
0973-1342Z	Journal of Indian Association for Child and Adolescent Mental Health	JIACAM	http://www.jiacam.org/index.html	Indian Association for Child and Adolescent Mental Health	English	0973-1342		children,adolescents,mental health	2005		2005-02-04T14:35:53Z	Psychology,Philosophy. Psychology. Religion,Psychology,Social Sciences	India	N	http://www.jiacam.org/guidelines1.html		Yes
0970-0218Z1998-3581	Indian Journal of Community Medicine		http://www.ijcm.org.in/	Indian Association of Preventive and Social Medicine	English	0970-0218	1998-3581	biomedical research,preventive medicine,social medicine	2005		2004-10-07T14:07:09Z	Public aspects of medicine,Medicine,Public Health,Health Sciences	India	N	http://www.ijcm.org.in/contributors.asp	by-nc-sa	Yes
1742-7622Z	Emerging Themes in Epidemiology	ETE	http://biomedcentral.com/1742-7622/	BioMed Central	English	1742-7622		biology of disease,epidemiology,public health,epidemiologic practice,epidemiologic research	2004		2004-10-11T13:42:38Z	Public aspects of medicine,Medicine,Public Health,Health Sciences	United Kingdom	Y	http://www.ete-online.com/about#apc	by	Yes
1415-4366Z1807-1929	Revista Brasileira de Engenharia Agrícola e Ambiental - Agriambi		http://www.scielo.br/scielo.php/script_sci_serial/pid_1415-4366/lng_en/nrm_iso/lng_en	Departamento de Engenharia Agrícola - UFCG	English,Spanish,Portuguese	1415-4366	1807-1929	irrigation,drainage,agricultural meteorology,climatology,agricultural products	2000		2004-10-12T15:20:35Z	Agriculture (General),Agriculture,Agriculture (General),Agriculture and Food Sciences	Brazil	N	http://www.scielo.br/revistas/rbeaa/iinstruc.htm	by-nc	Yes
1300-9818Z	Firat Tip Dergisi	Firat Medical Journal	http://www.firattipdergisi.com/	Fýrat University Faculty of Medicine	Turkish,English	1300-9818		medicine	2004		2004-10-19T13:27:46Z	Medicine (General),Medicine,Medicine (General),Health Sciences	Turkey	NY	http://www.firattipdergisi.com/instructions.php3?id=32		Yes
1476-9255Z	Journal of Inflammation		http://biomedcentral.com/1476-9255/	BioMed Central	English	1476-9255		inflammatory responses,pharmacology,anti-inflammatory drugs,therapeutic developments	2004		2004-10-15T09:05:06Z	Pathology,Medicine,Pathology,Medicine (General),Health Sciences	United Kingdom	Y	http://www.journal-inflammation.com/about#apc	by	Yes
1019-1941Z	Marmara Medical Journal		http://www.marmaramedicaljournal.org/index.php3	Marmara University	English,Turkish	1019-1941		General Medicine	2004		2006-12-22T14:07:13Z	Medicine (General),Medicine,Medicine (General),Health Sciences	Turkey	N	http://www.marmaramedicaljournal.org/instructions.php3?id=30		Yes
1690-4818Z	Procesos Históricos		http://www.saber.ula.ve/procesoshistoricos/	Universidad de Los Andes	Spanish	1690-4818		art,sciences	2002		2004-10-13T21:13:05Z	History (General),History (General) and history of Europe,History,History and Archaeology	Venezuela	NY	http://www.saber.ula.ve/procesoshistoricos/		Yes
0556-6606Z	Revista Forestal Venezolana		http://www.saber.ula.ve/revistaforestal	Universidad de Los Andes (Venezuela)	Spanish	0556-6606		forest sciences,vegetal physiology,forest pathology,entomology,plantations,genetics,forest improvement,river basins	1997		2004-10-13T21:13:05Z	Forestry,Agriculture,Forestry,Agriculture and Food Sciences,Environmental sciences,Geography. Anthropology. Recreation,Environmental Sciences,Earth and Environmental Sciences	Venezuela	NY	http://www.saber.ula.ve/revistaforestal/pdf/normas.pdf		Yes
1449-1907Z	International Journal of Medical Sciences		http://www.medsci.org/index.htm	Ivyspring International Publisher	English	1449-1907		medical sciences	2004		2004-10-20T15:14:23Z	Medicine (General),Medicine,Medicine (General),Health Sciences	Australia	Y	http://www.medsci.org/author.php	by-nc-nd	Yes
0022-9830Z1334-9090	Kemija u Industriji		http://www.hdki.hr/kui/	Croatian Society of Chemical Engineers	Croatian	0022-9830	1334-9090	chemical engineering,biochemical engineering	2004		2004-11-19T09:54:54Z	Chemical engineering,Chemical technology,Technology,Chemical Engineering,Chemistry	Croatia	N	http://pierre.fkit.hr/hdki/kui/en/instructions.html		Yes
1443-458XZ	Journal of Research and Practice in Information Technology		http://ws.acs.org.au/jrpit/	Australian Computer Society	English	1443-458X		computer science,software engineering,information systems,computer systems,information engineering	2003		2004-11-26T09:11:39Z	Electronic computers. Computer science,Instruments and machines,Mathematics,Science,Computer Science,Technology and Engineering	Australia	N	http://ws.acs.org.au/jrpit/JRPITAuthors.html		Yes
1527-9316Z	The Journal of Scholarship of Teaching and Learning	JoSoTL	https://www.iupui.edu/~josotl	Indiana University	English	1527-9316		pedagogy	2000		2004-12-16T10:57:06Z	Theory and practice of education,Education,Education,Social Sciences	United States	N	http://josotl.indiana.edu/about/submissions#authorGuidelines		Yes
1551-0670Z	Journal of Research in Rural Education		http://www.jrre.psu.edu/	Penn State University	English	1551-0670		history of education,sociology of education	1982		2004-12-20T16:28:48Z	Special aspects of education,Education,Education,Social Sciences	United States	N	http://www.jrre.psu.edu/submit.html		Yes
1614-9777Z	Thoracic Surgical Science		http://www.egms.de/en/journals/tss/index.shtml	German Medical Science, Düsseldorf	English,German	1614-9777		thoracic surgery	2004	2005	2004-12-27T13:59:18Z	Surgery,Medicine,Surgery,Medicine (General),Health Sciences	Germany	NY			Yes
1110-6859Z	Egyptian Journal of Biology		http://www.nottingham.ac.uk/~plzfg/EBBSoc/ejb.html	Egyptian British Biological Society	English	1110-6859		biological sciences,Egyptian fauna	1999		2005-01-10T15:45:59Z	Biology (General),Science,Biology,Biology and Life Sciences	Egypt	N	http://www.nottingham.ac.uk/~plzfg/EBBSoc/ejinstr.html		Yes
1550-7076Z	Heritage Language Journal		http://www.heritagelanguages.org/	Center for World Languages of UCLA, UC Consortium for Language Learning and Teaching	English	1550-7076		language education,psychology,sociology	2003		2005-01-12T10:54:57Z	Special aspects of education,Education,Education,Social Sciences,Philology. Linguistics,Language and Literature,Linguistics,Languages and Literatures	United States	N	http://www.international.ucla.edu/languages/heritagelanguages/journal/notes.asp?parentid=1318		Yes
1660-4601Z	International Journal of Environmental Research and Public Health		http://www.mdpi.com/journal/ijerph	MDPI AG	English	1660-4601		health sciences,public health,environmental pollution,environmental degradation	2004		2005-01-21T12:11:34Z	Public aspects of medicine,Medicine,Public Health,Health Sciences	Switzerland	Y	http://www.mdpi.com/journal/ijerph/apc	by	Yes
1542-3891Z	Electronic Journal of Boundary Elements (EJBE)		http://ejbe.libraries.rutgers.edu/index.php/ejbe	Rutgers University	English	1542-3891		Boundary Element Method (BEM),Boundary Integral Equation Method (BIE),	2003		2005-01-27T09:29:14Z	Mechanical engineering and machinery,Technology,Mechanical Engineering,Technology and Engineering	United States	N	http://ejbe.libraries.rutgers.edu/index.php/ejbe/about/submissions#authorGuidelines		Yes
1678-8931Z	Revista Virtual de Estudos da Linguagem - ReVEL		http://www.revel.inf.br/	Gabriel de Ávila Othero	Portuguese,Spanish,English	1678-8931		linguistics	2003		2005-02-25T15:23:12Z	Philology. Linguistics,Language and Literature,Linguistics,Languages and Literatures	Brazil	N	http://www.revel.inf.br/site2007/normas.php		Yes
0567-7920Z1732-2421	Acta Palaeontologica Polonica		http://www.app.pan.pl/	Polish Academy of Sciences	English	0567-7920	1732-2421	palaeontology,paleobiology,geobiology	1956		2005-07-27T09:38:13Z	Geology,Science,Earth Sciences,Earth and Environmental Sciences	Poland	Y	https://e-system.app.pan.pl/app/journal/for_authors/		Yes
1812-5654Z1812-5662	Journal of Applied Sciences		http://scialert.net/jindex.php?issn=1812-5654	Asian Network for Scientific Information	English	1812-5654	1812-5662	chemistry,environmental sciences,business,economics,physics,mathematics,statistics,geology,engineering,computer science,social sciences	2001		2005-02-07T09:31:19Z	General Works,Multidisciplinary,General Works	Pakistan	Y			Yes
1553-345XZ	American Journal of Environmental Sciences		http://thescipub.com/ajes.toc	Science Publications	English	1553-345X		environmental sciences	2005		2005-02-09T09:17:24Z	Environmental sciences,Geography. Anthropology. Recreation,Environmental Sciences,Earth and Environmental Sciences	United States	Y	http://thescipub.com/ajes.toc?authors		Yes
1064-9506Z	Behavior and Social Issues		http://www.behaviorandsocialissues.org	Behaviorists for Social Responsibility	English	1064-9506		behaviorism,social psychology	1999		2005-02-17T10:33:03Z	Sociology (General),Social Sciences,Sociology,Social Sciences,Psychology,Philosophy. Psychology. Religion,Psychology,Social Sciences	United States	N	http://www.uic.edu/htbin/cgiwrap/bin/ojs/index.php/bsi/about/submissions#authorGuidelines		Yes
0862-5468Z1804-5847	Ceramics-Silikáty		http://www.ceramics-silikaty.cz/index.htm	Academy of Sciences of the Czech Republic	English	0862-5468	1804-5847	ceramics,glass,physical chemistry,analytical chemistry	2000		2005-02-28T16:38:11Z	Chemistry,Science,Chemistry (General),Chemistry	Czech Republic	N	http://www.ceramics-silikaty.cz/html/notes.htm		Yes
0032-2490Z	Polarforschung		http://www.polarforschung.de/	Alfred Wegener Institute for Polar and Marine Research & German Society of Polar Research	German,English	0032-2490		Polar research,Arctic,Antarctic	1931		2010-03-12T13:50:53Z	Science (General),Science,Science (General),Science General	Germany	N	http://www.polarforschung.de/Redaktion/		Yes
1680-5194Z1994-7984	Pakistan Journal of Nutrition	PJN	http://scialert.net/jindex.php?issn=1680-5194	Asian Network for Scientific Information	English	1680-5194	1994-7984	nutrition science	2002		2005-02-21T11:14:10Z	Nutrition. Foods and food supply,Home economics,Technology,Nutrition and Food Sciences,Agriculture and Food Sciences	Pakistan	Y	http://scialert.net/guide.php?issn=1680-5194		Yes
1697-090XZ	Electronic Journal of Biomedicine	Revista Electrónica de Biomedicina	http://biomed.uninet.edu/index.html	Asociación Red Uninet	English,Spanish,Portuguese	1697-090X		biomedicine	2003		2005-02-22T16:14:21Z	Medicine (General),Medicine,Medicine (General),Health Sciences	Spain	N	http://biomed.uninet.edu/authors.html (English) http://biomed.uninet.edu/normas.html (Español)		Yes
1449-2288Z	International Journal of Biological Sciences		http://www.biolsci.org/index.htm	Ivyspring International Publisher	English	1449-2288		cell biology,developmental biology,structural biology,microbiology,molecular biology,genetics,biochemistry,biotechnology,biodiversity,ecology,marine biology,plant biology,bioinformatics	2005		2005-02-25T12:06:34Z	Biology (General),Science,Biology,Biology and Life Sciences	Australia	Y	http://www.biolsci.org/ms/author	by-nc-nd	Yes
1698-0476Z	Arxius de Miscel-lània Zoològica		http://amz.museucienciesjournals.cat/que-es/?lang=en	Museu de Ciències Naturals de Barcelona	English,Spanish,Catalan	1698-0476		faunistics,chorology,phenology,morphology,descriptive ecology,zoological diversity	2003		2005-02-28T13:30:53Z	Zoology,Science,Zoology,Biology,Biology and Life Sciences	Spain	N	http://amz.museucienciesjournals.cat/normes-de-publicacio/?lang=en	by	Yes
1824-8039Z	PoS - Proceedings of Science		http://pos.sissa.it/	SISSA	English	1824-8039		astronomy,biophysics,mathematics,neuroscience,physics,science communication	2005		2005-03-08T12:43:01Z	Science (General),Science,Science (General),Science General	Italy	N	http://pos.sissa.it/POSauthors.html		Yes
1518-1944Z	Revista Eletrônica de Enfermagem		http://www.fen.ufg.br/revista	Universidade Federal de Goias	Portuguese,English,Spanish	1518-1944		nursing,health sciences	1999		2005-03-18T10:53:31Z	Nursing,Medicine,Nursing,Health Sciences	Brazil	N	http://www.fen.ufg.br/revista/pre-textuais/normas-en.htm	by	Yes
1553-7366Z1553-7374	PLoS Pathogens		http://www.plospathogens.org/	Public Library of Science (PLoS)	English	1553-7366	1553-7374	pathogens,pathogen-cell biology,bacteria,fungi,parasites,prions,viruses,pathogen-host interactions	2005		2005-03-21T15:48:02Z	Microbiology,Science,Microbiology,Biology,Biology and Life Sciences,Infectious and parasitic diseases,Internal medicine,Medicine,Internal medicine,Medicine (General),Health Sciences	United States	Y	http://www.plospathogens.org/static/guidelines.action	by	Yes
1415-790XZ1980-5497	Revista Brasileira de Epidemiologia	Brazilian Journal of Epidemiology	http://www.scielo.br/scielo.php/script_sci_serial/pid_1415-790X/lng_en/nrm_iso/lng_en	Associação Brasileira de Pós -Graduação em Saúde Coletiva	Portuguese,Spanish,English	1415-790X	1980-5497	epidemiology,public health,medicine	1998		2005-03-23T14:48:52Z	Public aspects of medicine,Medicine,Public Health,Health Sciences	Brazil	N	http://www.scielo.br/revistas/rbepid/iinstruc.htm		Yes
1517-106XZ1807-0299	Alea : Estudos Neolatinos		http://www.scielo.br/scielo.php/script_sci_serial/pid_1517-106X/lng_en/nrm_iso	Unversidade Federal do Rio de Janeiro	Portuguese	1517-106X	1807-0299	linguistics,literature	2003		2005-03-24T10:37:09Z	Philology. Linguistics,Language and Literature,Linguistics,Languages and Literatures,Literature (General),Language and Literature,Languages and Literatures	Brazil	N	http://www.scielo.br/revistas/alea/iinstruc.htm	by-nc	Yes
0716-0925Z0718-1043	Estudios Atacameños		http://www.scielo.cl/scielo.php?script=sci_serial&lng=en&pid=0718-1043&nrm=iso	Universidad Católica del Norte	Spanish	0716-0925	0718-1043	social-anthropology,ethno-history,bio-anthropology	2002		2005-03-24T11:37:20Z	Ethnology. Social and cultural anthropology,Anthropology,Geography. Anthropology. Recreation,Ethnology,Social Sciences,Archaeology,Auxiliary sciences of history,Archaeology,History and Archaeology	Chile	N	http://www.scielo.cl/revistas/eatacam/iinstruc.htm		Yes
0035-0451Z0718-0934	Revista Signos		http://www.scielo.cl/scielo.php?script=sci_serial&lng=en&pid=0718-0934&nrm=iso	Pontificia Universidad Católica de Valparaíso	Spanish,English	0035-0451	0718-0934	language sciences,literature	1997		2005-03-24T13:31:57Z	Literature (General),Language and Literature,Languages and Literatures,Philology. Linguistics,Language and Literature,Linguistics,Languages and Literatures	Chile	N	http://www.scielo.cl/revistas/signos/iinstruc.htm		Yes
1134-8046Z	Revista de la Sociedad Española del Dolor		http://scielo.isciii.es/scielo.php/script_sci_serial/pid_1134-8046/lng_en/nrm_iso	Sociedad Española del Dolor	Spanish	1134-8046		pain pathology,pain treatment,pain diagnosis	2004		2005-03-30T13:15:05Z	Pathology,Medicine,Pathology,Medicine (General),Health Sciences	Spain	N	http://scielo.isciii.es/revistas/dolor/iinstruc.htm		Yes
1744-6708Z1744-6716	Westminster Papers in Communication and Culture	WPCC	http://www.westminster.ac.uk/research/a-z/camri/wpcc	University of Westminster	English	1744-6708	1744-6716	popular culture,media audiences,political economy,promotional culture,new media,political communication,migration studies,diasporic studies	2004		2005-04-08T14:33:51Z	Communication. Mass media,Philology. Linguistics,Language and Literature,Media and communication,Social Sciences,Political science (General),Political science,Political Science,Law and Political Science	United Kingdom	N	http://www.westminster.ac.uk/research/a-z/camri/wpcc/how-to-submit-a-paper		Yes
1814-0556Z	International Journal of Education and Development using Information and Communication Technology	IJEDICT	http://ijedict.dec.uwi.edu//index.php	University of the West Indies	English	1814-0556		community informatics,e-commerce,e-democracy,education,ICT	2005		2005-04-11T09:08:43Z	Education (General),Education,Education,Social Sciences,Information technology,Industrial engineering. Management engineering,Technology (General),Technology,Computer Science,Technology and Engineering	Barbados	N	http://ijedict.dec.uwi.edu/submissions.php#guidelines		Yes
1790-045XZ2241-5793	Journal of Biological Research		http://www.jbr.gr/main/index.htm	Aristotle University of Thessaloniki	English	1790-045X	2241-5793	biological sciences	2004		2005-04-11T10:39:00Z	Biology (General),Science,Biology,Biology and Life Sciences	Greece	NY			Yes
1860-2010Z	Constructions		http://elanguage.net/journals/constructions/index	University of Duesseldorf	English,German	1860-2010		language,linguistics	2004		2005-04-25T16:40:14Z	Philology. Linguistics,Language and Literature,Linguistics,Languages and Literatures	Germany	N	http://elanguage.net/journals/constructions/about/submissions#authorGuidelines		Yes
1746-4269Z	Journal of Ethnobiology and Ethnomedicine		http://www.ethnobiomed.com/	BioMed Central	English	1746-4269		ethnobotany,ethnozoology,ethnoecology,ethnopharmacy,ethnomedicine,ethnoveterinary,traditional medicines,healthcare,gender studies,ethnobiology	2005		2005-04-26T09:27:44Z	Ethnology. Social and cultural anthropology,Anthropology,Geography. Anthropology. Recreation,Ethnology,Social Sciences	United Kingdom	Y	http://www.ethnobiomed.com/info/instructions/	by	Yes
1614-0923Z	RTejournal - Forum für Rapid Technologie		http://www.rtejournal.de/	Aachen University of Applied Sciences	German,English	1614-0923		generative manufacturing,additive manufacturing,rapid technology,RT,rapid prototyping,RP	2004		2005-04-27T09:50:14Z	Manufactures,Technology,Manufactures,Technology and Engineering,Computer engineering. Computer hardware,Electronics,Electrical engineering. Electronics. Nuclear engineering,Technology,Computer Science,Technology and Engineering	Germany	N	http://www.rtejournal.de/richtlinien		Yes
1022-1301Z2075-8359	Archivos Latinoamericanos de Producción Animal	Latin-American Archives of Animal Production	http://www.alpa.org.ve/ojs/index.php	Asociación Latinoamericana de Producción Animal	Spanish,Portuguese,English	1022-1301	2075-8359	animal production,forages,ruminants,nutrition,animal health	2005		2005-05-03T13:32:20Z	Animal culture,Agriculture,Animal Sciences,Agriculture and Food Sciences	Venezuela	N	http://www.alpa.org.ve/ojs/index.php/ojs_files/about/submissions#authorGuidelines		Yes
1795-6889Z	Human Technology		http://www.humantechnology.jyu.fi/	Agora Center, University of Jyväskylä	English	1795-6889		ICT,human-technology interaction,information technology,communication technology	2005		2005-05-09T11:16:37Z	Information technology,Industrial engineering. Management engineering,Technology (General),Technology,Computer Science,Technology and Engineering,Communication. Mass media,Philology. Linguistics,Language and Literature,Media and communication,Social Sciences	Finland	N	http://www.humantechnology.jyu.fi/submission/		Yes
1581-9175Z1854-1941	Acta Agriculturae Slovenica		http://aas.bf.uni-lj.si/index-en.htm	University of Ljubljana	Slovenian,English	1581-9175	1854-1941	nutrition,genetics,microbiology,economics,dairying,statistics,rural population,animal culture,plant culture	2004		2005-05-11T13:22:23Z	Agriculture (General),Agriculture,Agriculture (General),Agriculture and Food Sciences	Slovenia	N	http://aas.bf.uni-lj.si/instructions.htm		Yes
0301-2123Z	Acta Biológica Paranaense		http://ojs.c3sl.ufpr.br/ojs2/index.php/acta/	Universidade Federal do Paraná	Portuguese,English,French,Spanish	0301-2123		natural history,biology,genetics,zoology,botany	1972		2006-05-19T14:32:28Z	Biology (General),Science,Biology,Biology and Life Sciences	Brazil	N	http://ojs.c3sl.ufpr.br/ojs2/index.php/acta/about/submissions#authorGuidelines		Yes
0392-6672Z1827-806X	International Journal of Speleology		http://www.ijs.speleo.it	Società Speleologica Italiana	English,French,German,Italian,Spanish	0392-6672	1827-806X	karst research,cave research,speleology,geology,biology	1964		2006-05-19T15:48:42Z	Geology,Science,Earth Sciences,Earth and Environmental Sciences,Physical geography,Geography. Anthropology. Recreation,Geography,Earth and Environmental Sciences	Italy	N	http://scholarcommons.usf.edu/ijs/guidelines.html		Yes
1488-559XZ	Journal of Military and Strategic Studies		http://jmss.synergiesprairies.ca/jmss/index.php/jmss/index	University of Calgary	English,French	1488-559X		military history,security,strategic studies	1998		2006-05-22T14:30:12Z	Military Science,Military Science,Technology and Engineering	Canada	N	http://www.jmss.org/jmss/index.php/jmss/about/submissions#authorGuidelines		Yes
1794-6190Z	Earth Sciences Research Journal	ESRJ	http://www.ciencias.unal.edu.co/esrj.eng/	Universidad Nacional de Colombia	English	1794-6190		geosciences	2004		2006-05-29T16:42:46Z	Geology,Science,Earth Sciences,Earth and Environmental Sciences	Colombia	N	http://www.ciencias.unal.edu.co/unciencias/web/dependencia/?itpad=0&niv=0&itact=385&ti=false&dep=17		Yes
1747-1028Z	Cell Division		http://www.celldiv.com/	BioMed Central	English	1747-1028		cell cycle control,eukaryotes	2006		2006-05-31T09:52:03Z	Cytology,Biology (General),Science,Cytology,Biology,Biology and Life Sciences	United Kingdom	Y	http://www.celldiv.com/about#apc	by	Yes
1699-2334Z	Revista Electrónica de la Autopsia	The Electronic Journal of Autopsy	http://rea.uninet.edu	Red Universitaria de Servicios Telemáticos Integrados para Comunidades Virtuales de Usuariarios.	Spanish	1699-2334		medicine,pathology,clinical autopsy	2003		2006-06-07T12:48:12Z	Pathology,Medicine,Pathology,Medicine (General),Health Sciences	Spain	N	http://rea.uninet.edu/index.php/ejautopsy/information/authors	by	Yes
1133-9926Z2340-2725	Docencia e Investigación		http://www.uclm.es/profesorado/ricardo/Docencia_e_Investigacion/Docencia_e_Investigacion.htm	E.U. Magisterio de Toledo	Spanish	1133-9926	2340-2725	educational research,teaching	2001		2006-06-13T14:22:54Z	Education (General),Education,Education,Social Sciences	Spain	N	http://www.uclm.es/varios/revistas/docenciaeinvestigacion/normas.asp		Yes
2251-6085Z2251-6093	Iranian Journal of Public Health		http://ijph.tums.ac.ir/index.php/IJPH/index	Tehran University of Medical Sciences	English	2251-6085	2251-6093	public health	2001		2006-06-14T16:38:43Z	Public aspects of medicine,Medicine,Public Health,Health Sciences	Iran	N	http://ijph.tums.ac.ir/index.php/IJPH/about/submissions#authorGuidelines	by-nc	Yes
0187-6961Z	Estudios Fronterizos		http://www.uabc.mx/iis/ref	Universidad Autonoma de baja California	Spanish,English	0187-6961		border studies,social science,humanities	2000		2006-06-15T10:57:25Z	Social sciences (General),Social Sciences,Social Sciences	Mexico	N	http://www.uabc.mx/iis/ref/Ref-Instrucciones.htm		Yes
1981-8068Z1981-8076	Interação em Psicologia		http://ojs.c3sl.ufpr.br/ojs2/index.php/psicologia	Universidade Federal do Parana	Portuguese	1981-8068	1981-8076	psychology,psychoanalysis,behavior analysis	2002		2006-06-16T12:00:22Z	Psychology,Philosophy. Psychology. Religion,Psychology,Social Sciences	Brazil	N	http://ojs.c3sl.ufpr.br/ojs2/index.php/psicologia/about/submissions#authorGuidelines		Yes
1678-765XZ	Revista Digital de Biblioteconomia e Ciência da Informação	RDBCI	http://www.sbu.unicamp.br/seer/ojs/index.php	Universidade Estadual de Campinas	Portuguese,English,Spanish	1678-765X		information science,communication science	2003		2006-07-04T09:56:40Z	Bibliography. Library science. Information resources,Library and Information Science,Social Sciences	Brazil	N	http://www.sbu.unicamp.br/seer/ojs/index.php/rbci/about/submissions#authorGuidelines		Yes
1052-3073Z	Journal of Financial Counseling and Planning		http://www.afcpe.org/publications/journal-articles.php	Association for Financial Counseling and Planning Education	English	1052-3073		financial counseling,financial planning,financial management research	1990		2006-07-06T16:47:34Z	Finance,Social Sciences,Business and Management,Business and Economics	United States	N	http://www.afcpe.org/assets/documents/publications/manuscript_edit.pdf		Yes
0798-9598Z	Capítulo Criminológico		http://revistas.luz.edu.ve/index.php/cc/index	Universidad del Zulia	Spanish	0798-9598		criminology	2001		2006-07-07T11:03:26Z	Social pathology. Social and public welfare. Criminology,Social Sciences,Social and Public Welfare,Sociology,Social Sciences	Venezuela	N			Yes
1315-8597Z	Gaceta Laboral		http://www.scielo.org.ve/scielo.php?script=sci_serial&pid=1315-8597&lng=es&nrm=iso	Universidad del Zulia	Spanish	1315-8597		law,political science	2005		2006-07-07T15:50:28Z	Law in general. Comparative and uniform law. Jurisprudence,Law,Law,Law and Political Science	Venezuela	N	http://www.scielo.org.ve/revistas/gl/einstruc.htm		Yes
1750-0680Z	Carbon Balance and Management		http://www.cbmjournal.com/home	BioMed Central	English	1750-0680		global carbon cycle,climate,atmospheric carbon dioxide,terrestrial biospheres,oceanic biospheres	2006		2006-07-13T10:07:45Z	Meteorology. Climatology,Physics,Science,Meteorology and Climatology,Earth and Environmental Sciences	United Kingdom	Y	http://www.cbmjournal.com/about#apc	by	Yes
1613-1878Z	Gender Forum		http://www.genderforum.org/	University of Cologne	English	1613-1878		feminist theory,queer studies,feminist literary criticism,literary studies,interdisciplinary gender studies	2002		2009-02-20T14:21:45Z	Women. Feminism,The family. Marriage. Woman,Social Sciences,Gender Studies,Social Sciences	Germany	N	http://www.genderforum.org/call-for-contributions/		Yes
1424-862XZ1424-8638	Neurosignals		http://www.karger.com/nsg	S. Karger AG	English	1424-862X	1424-8638	neurobiology,pharmacology,cell biology,neuroendocrinology	2013		2006-08-16T16:32:13Z	Neurology. Diseases of the nervous system,Neurosciences. Biological psychiatry. Neuropsychiatry,Internal medicine,Medicine,Neurology,Medicine (General),Health Sciences	Switzerland	Y	http://www.karger.com/Journal/Guidelines/224154	by-nc	Yes
1301-3718Z	Journal of Faculty of Educational Sciences	Ankara Universitesi Egitim Bilimleri Fakultesi Dergisi	http://dergiler.ankara.edu.tr/detail.php?id=40	Ankara University	English,Turkish	1301-3718		educational research,special education,educational psychology	2000		2006-08-28T12:01:52Z	Education (General),Education,Education,Social Sciences	Turkey	N	http://dergiler.ankara.edu.tr/ilkeler/eng/40.pdf		Yes
1697-820XZ1885-8104	Cuadernos Internacionales de Tecnología para el Desarrollo Humano		http://www.cuadernos.tpdh.org/	Ingeniería Sin Fronteras	Spanish,Catalan	1697-820X	1885-8104	technology,human development,engineering,basic services,international cooperation	2004		2006-08-29T09:52:24Z	Technology (General),Technology,Technology (General),Technology and Engineering,Environmental engineering,Engineering (General). Civil engineering (General),Technology,Environmental Engineering,Technology and Engineering	Spain	N			Yes
1860-5605Z	Forum Historiae Iuris		http://www.forhistiur.de/	FHI	German,English,French,Italian,Spanish	1860-5605		legal history	1997		2005-05-30T09:47:27Z	Law in general. Comparative and uniform law. Jurisprudence,Law,Law,Law and Political Science	Germany	N	http://fhi.rg.mpg.de/static_en/author.htm		Yes
1300-0101Z1303-6122	Turkish Journal of Physics		http://journals.tubitak.gov.tr/physics/index.php	Scientific and Technical Research Council of Turkey	English	1300-0101	1303-6122	physics,astrophysics	1998		2005-05-31T15:49:55Z	Physics,Science,Physics (General),Physics and Astronomy	Turkey	N	http://journals.tubitak.gov.tr/physics/i2cfiz.pdf		Yes
1300-0152Z1303-6092	Turkish Journal of Biology		http://journals.tubitak.gov.tr/biology/index.php	Scientific and Technical Research Council of Turkey	English	1300-0152	1303-6092	biological sciences,genetics,molecular biology,microbiology,physiology,cytology	1998		2005-05-31T16:19:16Z	Biology (General),Science,Biology,Biology and Life Sciences	Turkey	NY			Yes
1300-008XZ1303-6106	Turkish Journal of Botany		http://journals.tubitak.gov.tr/botany/index.php	Scientific and Technical Research Council of Turkey	English	1300-008X	1303-6106	botany	1998		2005-05-31T16:41:01Z	Botany,Science,Botany,Biology,Biology and Life Sciences	Turkey	NY	http://journals.tubitak.gov.tr/botany/i2cbot.pdf		Yes
1300-0179Z1303-6114	Turkish Journal of Zoology		http://journals.tubitak.gov.tr/zoology/index.php	Scientific and Technical Research Council of Turkey	English	1300-0179	1303-6114	zoology	1998		2005-06-01T11:33:26Z	Zoology,Science,Zoology,Biology,Biology and Life Sciences	Turkey	NY	http://journals.tubitak.gov.tr/zoology/i2czoo.pdf		Yes
1120-2440Z	Bollettino del CILEA		http://bollettino.cilea.it/about/index	Consorzio Interuniversitario Lombardo per l'Elaborazione Automatica	Italian	1120-2440		automatic processing,hardware,software	1996		2005-06-01T11:39:49Z	Information technology,Industrial engineering. Management engineering,Technology (General),Technology,Computer Science,Technology and Engineering	Italy	N	http://bollettino.cilea.it/submissions.php#guidelines	by	Yes
1300-011XZ1303-6173	Turkish Journal of Agriculture and Forestry Sciences		http://journals.tubitak.gov.tr/agriculture/index.php	Scientific and Technical Research Council of Turkey	English	1300-011X	1303-6173	agriculture,forestry	1998		2005-06-01T14:06:26Z	Agriculture (General),Agriculture,Agriculture (General),Agriculture and Food Sciences,Forestry,Agriculture,Forestry,Agriculture and Food Sciences	Turkey	N	http://journals.tubitak.gov.tr/agriculture/i2ctar.pdf		Yes
1746-6148Z	BMC Veterinary Research		http://www.biomedcentral.com/bmcvetres	BioMed Central	English	1746-6148		veterinary science,veterinary medicine	2005		2005-06-01T15:48:42Z	Veterinary medicine,Animal culture,Agriculture,Animal Sciences,Agriculture and Food Sciences	United Kingdom	Y	http://www.biomedcentral.com/bmcvetres/ifora/	by	Yes
1687-4188Z1687-4196	International Journal of Biomedical Imaging	IJBI	http://www.hindawi.com/journals/ijbi/	Hindawi Publishing Corporation	English	1687-4188	1687-4196	data acquisition,image reconstruction,image analysis,biomedical imaging	2006		2005-06-01T17:10:42Z	Medicine (General),Medicine,Medicine (General),Health Sciences	Egypt	Y	http://www.hindawi.com/journals/ijbi/apc/	by	Yes
1548-9639Z1554-6349	Scientific International Journal		http://www.nperci.org/index_files/SIJ.htm	Non-Profit Evaluation & Resource Center, Inc.	English,Spanish	1548-9639	1554-6349	evaluation research,policy,health,education,social sciences	2004		2005-06-03T09:24:41Z	Social pathology. Social and public welfare. Criminology,Social Sciences,Social and Public Welfare,Sociology,Social Sciences	Puerto Rico	NY			Yes
1611-9509Z	Historische Literatur	Rezensionszeitschrift von H-Soz-u-Kult	http://edoc.hu-berlin.de/e_histlit/	Humboldt-Universität zu Berlin	German	1611-9509		ancient history,medieval history,modern history,early modern times	2003		2005-11-01T17:33:55Z	History (General),History (General) and history of Europe,History,History and Archaeology	Germany	NY	http://edoc.hu-berlin.de/e_autoren/was-diss.php?arbeit=Dissertationen%20%C2%BB&nav=diss&nav_this=Was%20muss%20eingereicht%20werden?&index=index.php		Yes
1735-188XZ	Webology		http://www.webology.org/	Regional Information Center for Science and Technology (RICeST)	English	1735-188X		information dissemination,communication processes,World Wide Web	2004		2005-06-09T14:23:32Z	Bibliography. Library science. Information resources,Library and Information Science,Social Sciences	Iran	N	http://www.webology.org/guidelines.html	by-nc-nd	Yes
1448-6156Z	Spreadsheets in Education		http://epublications.bond.edu.au/ejsie	Bond University	English	1448-6156		constructivism	2003		2005-06-09T16:13:45Z	Theory and practice of education,Education,Education,Social Sciences	Australia	N	http://epublications.bond.edu.au/cgi/login.cgi?return_to=http%3A%2F%2Fepublications.bond.edu.au%2Fcgi%2Fsubmit.cgi%3Fcontext%3Dejsie&context=ejsie		Yes
1724-6768Z	Ri-vista : Ricerche per la Progettazione del Paesaggio		http://www.unifi.it/ri-vista/	Firenze University Press	Italian	1724-6768		landscape architecture	2003		2005-06-13T13:54:02Z	Architecture,Fine Arts,Architecture,Arts and Architecture	Italy	N			Yes
1449-9789Z	Journal of University Teaching and Learning Practice		http://jutlp.uow.edu.au/	University of Wollongong	English	1449-9789		higher education	2004		2005-06-14T10:39:39Z	Theory and practice of education,Education,Education,Social Sciences	Australia	N	http://jutlp.uow.edu.au/submit.html		Yes
1023-7763Z1680-9408	Journal für Mineralstoffwechsel		http://www.kup.at/journals/mineralstoffwechsel/index.html	Krause & Pachernegg GmbH	German	1023-7763	1680-9408	osteoporosis,rheumatology,orthopaedy,mineral metabolism	2001		2005-06-26T16:12:57Z	Diseases of the musculoskeletal system,Specialties of internal medicine,Internal medicine,Medicine,Internal medicine,Medicine (General),Health Sciences	Austria	N	http://www.kup.at/journals/mineralstoffwechsel/richtlinien.html		Yes
1773-0538Z	Linguistica Occitana		http://www.revistadoc.org/	Association Linguistica Occitana	Occitan,Catalan,English,French	1773-0538		Occitan linguistics	2004		2005-06-28T10:46:42Z	Philology. Linguistics,Language and Literature,Linguistics,Languages and Literatures	France	N	http://www.revistadoc.org/articles.php?lng=fr&pg=174		Yes
0004-0592Z1885-4494	Archivos de Zootecnia : Revista Trimestral		http://www.uco.es/organiza/servicios/publica/az/az.htm	Universidad de Córdoba	Spanish,English,French,Portuguese,Italian	0004-0592	1885-4494	zootechnics,genetics,ethnology,reproduction,economy	1975		2005-06-30T13:38:44Z	Zoology,Science,Zoology,Biology,Biology and Life Sciences,Animal culture,Agriculture,Animal Sciences,Agriculture and Food Sciences	Spain	N	http://www.uco.es/organiza/servicios/publica/az/php/az.php?idioma_global=0&revista=0&codigo=17		Yes
1941-899XZ	Journal of Management Research	jmr	http://www.macrothink.org/journal/index.php/jmr/index	Macrothink Institute	English	1941-899X		management,marketing,accounting,finance	2009		2010-03-08T11:59:14Z	Business,Commerce,Social Sciences,Business and Management,Business and Economics	United States	Y	http://www.macrothink.org/journal/index.php/jmr/about/submissions#authorFees		Yes
0029-2540Z	North Carolina Libraries		http://www.ncl.ecu.edu/index.php/NCL	North Carolina Library Association	English	0029-2540		librarianship,media centers,academic libraries	2002		2006-11-06T14:49:32Z	Bibliography. Library science. Information resources,Library and Information Science,Social Sciences	United States	N	http://www.ncl.ecu.edu/index.php/NCL/about/submissions#onlineSubmissions		Yes
0795-8080Z	Biokemistri		http://www.bioline.org.br/bk	Nigerian Society for Experimental Biology	English	0795-8080		biochemistry	2003		2005-07-25T14:21:02Z	Biochemistry,Organic chemistry,Chemistry,Science,Biochemistry,Life Sciences,Biology and Life Sciences	Nigeria	Y	http://www.bioline.org.br/info?id=bk&doc=instr		Yes
0494-1373Z	Tuberculosis and Thorax	Tüberküloz ve Toraks	http://www.tuberktoraks.org/	Turkish Association of Tuberculosis & Torax	Turkish,English	0494-1373		thorax diseases,tuberculosis	2004		2005-07-25T16:22:45Z	Internal medicine,Medicine,Internal medicine,Medicine (General),Health Sciences	Turkey	NY	http://www.tuberktoraks.org/content.aspx?content_id=4&menu_id=Menu04		Yes
1347-4367Z1880-0920	Drug Metabolism and Pharmacokinetics		http://www.jstage.jst.go.jp/browse/dmpk	Japanese Society for the Study of Xenobiotics	English	1347-4367	1880-0920	drug metabolism,pharmacokinetics,pharmacodynamics	2002		2005-07-29T14:27:01Z	Therapeutics. Pharmacology,Medicine,Therapeutics,Medicine (General),Health Sciences	Japan	N			Yes
1576-4737Z	CIRCULO de Linguistica Aplicada a la Comunicacion	CLAC	http://www.ucm.es/info/circulo	Universidad Complutense de Madrid	Spanish,English,French,German,Portuguese,Basque,Catalan,Italian	1576-4737		language	2000		2005-08-02T16:23:28Z	Communication. Mass media,Philology. Linguistics,Language and Literature,Media and communication,Social Sciences,Philology. Linguistics,Language and Literature,Linguistics,Languages and Literatures	Spain	N	http://www.ucm.es/info/circulo/art.pdf		Yes
1176-9351Z	Cancer Informatics		http://la-press.com/journal.php?journal_id=10	Libertas Academica	English	1176-9351		bioinformatics,computational biology,statistics,pathology informatics,cancer research	2005		2005-08-19T11:12:02Z	Neoplasms. Tumors. Oncology. Including cancer and carcinogens,Internal medicine,Medicine,Oncology,Medicine (General),Health Sciences	New Zealand	Y	http://www.la-press.com/author_resources.php?folder_id=121	by	Yes
1665-4420Z	Signos Históricos		http://www.redalyc.org/revista.oa?id=344	Universidad Autónoma Metropolitana Unidad Iztapalapa	Spanish	1665-4420		history of Mexico,law,politics	1999		2005-08-24T07:48:23Z	History (General),History (General) and history of Europe,History,History and Archaeology	Mexico	CON	http://www.redalyc.org/revista.oa?id=1993		Yes
0120-386XZ	Revista Facultad Nacional de Salud Pública	Revista Facultad Nacional de Salud Publica	http://aprendeenlinea.udea.edu.co/revistas/index.php/fnsp/index	Universidad de Antioquia	Spanish	0120-386X		public health,health sciences	2000		2011-01-20T13:08:44Z	Public aspects of medicine,Medicine,Public Health,Health Sciences	Colombia	N	http://aprendeenlinea.udea.edu.co/revistas/index.php/fnsp/about/submissions#authorGuidelines	by-nc-nd	Yes
1854-0392Z	Illiesia		http://www2.pms-lj.si/illiesia	Slovenian Museum of Natural History, Mississippi College	English	1854-0392		stoneflies,plecoptera,insects	2005		2005-11-07T13:12:34Z	Zoology,Science,Zoology,Biology,Biology and Life Sciences	Slovenia	N	http://mrc.pms-lj.si/illiesia/html/instructions.html		Yes
1543-4826Z	Journal of American Physicians and Surgeons		http://www.jpands.org	Association of American Physicians and Surgeons	English	1543-4826		medicine	2003		2005-11-08T09:22:06Z	Medicine (General),Medicine,Medicine (General),Health Sciences	United States	N	http://www.jpands.org/vol12no4/instructions.pdf		Yes
1817-2172Z	Differencialʹnye Uravneniâ i Processy Upravleniâ	Differential equations and control processes	http://www.neva.ru/journal	Saint-Petersburg State Technical University	Russian,English	1817-2172		nonlinear dynamics,control processes,computation,algorithms	1997		2005-11-09T11:47:54Z	Mathematics,Science,Mathematics,Mathematics and Statistics	Russia	N	http://www.neva.ru/journal/eng/e_inform.htm		Yes
1720-190XZ	Storia e Futuro		http://www.storiaefuturo.com/	Dipartimento di Discipline Storiche di Bologna	Italian,French,English	1720-190X		historiography	2002		2005-11-10T09:51:25Z	History (General),History (General) and history of Europe,History,History and Archaeology	Italy	N	http://www.storiaefuturo.com/testi/nome_redazionali.pdf		Yes
1481-9384Z	Perspectives Interdisciplinaires sur le Travail et la Santé	PISTES	http://pistes.revues.org/	PISTES	French	1481-9384		health,occupational health,industrial accident prevention	1999		2005-11-10T12:19:35Z	Social history and conditions. Social problems. Social reform,Social Sciences,Sociology,Social Sciences	Canada	N	http://pistes.revues.org/2873		Yes
0213-4691Z1989-9890	Investigaciones Geográficas		http://www.investigacionesgeograficas.com/	Universidad de Alicante	Spanish	0213-4691	1989-9890	geography,land management,land use,landscape	1983		2005-12-06T09:29:55Z	Geography (General),Geography. Anthropology. Recreation,Geography,Earth and Environmental Sciences	Spain	N	http://www.investigacionesgeograficas.com/normas-de-publicación/		Yes
1769-7298Z	M@ppemonde	Mappemonde	http://mappemonde.mgm.fr	Maison de la géographie	French	1769-7298		geography,maps,cartography	2004		2005-11-18T12:00:12Z	Mathematical geography. Cartography,Geography. Anthropology. Recreation,Geography,Earth and Environmental Sciences	France	N	http://mappemonde.mgm.fr/ecrire.html		Yes
1885-642XZ1886-3655	Pharmacy Practice		http://www.pharmacypractice.org/	Centro de Investigaciones y Publicaciones Farmaceuticas	English	1885-642X	1886-3655	pharmacy practice,pharmacy services,patient care	2006		2006-05-04T12:41:54Z	Pharmacy and materia medica,Medicine,Pharmacy and materia medica,Medicine (General),Health Sciences	Spain	N	http://www.pharmacypractice.org/authors/	by-nc-nd	Yes
1665-0441Z	Ra Ximhai		http://raximhai.com.mx/Portal/	Universidad Autónoma Indígena de México	Spanish,English,French	1665-0441		sustainable development,society,culture	2005		2005-11-22T15:29:41Z	Social sciences (General),Social Sciences,Social Sciences	Mexico	NY	http://uaim.edu.mx/webraximhai/GUIADEAUTORES.pdf		Yes
1555-1369Z	Lean Construction Journal		http://www.leanconstructionjournal.org/	Lean Construction Institute	English	1555-1369		lean construction,lean design,construction process	2004		2005-11-25T13:54:21Z	Building construction,Technology,Construction,Technology and Engineering	United States	N	http://www.leanconstruction.org/lcj/authors.html		Yes
0809-1668Z1503-2086	Nordlit : Tidsskrift i litteratur og kultur		http://www.ub.uit.no/baser/septentrio/index.php/nordlit	Universitetet i Tromsø	Norwegian,English	0809-1668	1503-2086	Norwegian literature,world literature	1997		2005-12-01T14:51:52Z	Norwegian literature,Language and Literature,Languages and Literatures	Norway	N	http://www.ub.uit.no/baser/septentrio/index.php/nordlit/about/submissions#authorGuidelines	by-nc-sa	Yes
1523-5734Z	Bryn Mawr Review of Comparative Literature		http://www.brynmawr.edu/bmrcl/	Bryn Mawr College	English	1523-5734		comparative literature,reviews	1999		2005-12-07T13:39:33Z	Literature (General),Language and Literature,Languages and Literatures	United States	N	http://www.brynmawr.edu/bmrcl/listing.html		Yes
1519-3276Z2177-5648	OPSIS : Revista do Departamento de História e Ciências Sociais	OPSIS : Revista do Departamento de Historia e Ciencias Sociais	http://www.revistas.ufg.br/index.php/Opsis	Universidade Federal de Goiás	Portuguese	1519-3276	2177-5648	social sciences,humanities,arts	2001		2010-09-13T09:30:34Z	General Works,Multidisciplinary,General Works	Brazil	N	http://www.revistas.ufg.br/index.php/Opsis/about/submissions#authorGuidelines	by-nc	Yes
1832-1526Z	Australian Review of Public Affairs		http://www.australianreview.net/	University of Sydney	English	1832-1526		sociology,public policy,Australia,economics	2004		2005-12-12T12:13:22Z	General Works,Multidisciplinary,General Works	Australia	N	http://www.australianreview.net/info/journal.html		Yes
0102-2105Z	Revista da AMRIGS	Official Journal of the Associação Médica do Rio Grande do Sul (MEDICAL ASSOCIATION OF RIO GRANDE DO SUL - BRAZIL)	http://www.amrigs.com.br/revista/	AGE – Assessoria Gráfica e Editorial Ltda.	Portuguese	0102-2105		medicine	2000		2005-12-27T13:35:28Z	Medicine (General),Medicine,Medicine (General),Health Sciences	Brazil	NY	http://www.amrigs.com.br/revista/instrucoes_redatoriais.htm		Yes
1740-4304Z	Pores : an Avant-gardist Journal of Poetics Research		http://www.pores.bbk.ac.uk	Contemporary Poetics Research Centre, School of English and Humanities, Birkbeck College, University of London	English	1740-4304		contemporary poetry,poetics	2001		2006-01-03T09:50:32Z	English literature,Language and Literature,Languages and Literatures	United Kingdom	N			Yes
0132-6414Z1816-0328	Fizika Nizkih Temperatur	Low Temperature Physics	http://fnte.ilt.kharkov.ua/fnt_e.html	B.Verkin Institute for Low Temperature Physics and Engineering	Russian,English	0132-6414	1816-0328	low temperature physics	1997		2006-01-03T16:16:55Z	Physics,Science,Physics (General),Physics and Astronomy	Ukraine	N	http://fnte.ilt.kharkov.ua/rule.pdf		Yes
1540-8760Z	Cuneiform Digital Library Bulletin		http://cdli.ucla.edu/pubs/cdlb.html	Cuneiform Digital Library Initiative	English	1540-8760		cuneiform studies,Assyriology	2002		2006-01-11T11:06:33Z	Oriental languages and literatures,Language and Literature,Languages and Literatures	United States	N	http://cdli.ucla.edu/pubs/guide_index.html		Yes
1885-2785Z	Papers Lextra		http://www.lextra.uji.es/papers/	Institut Joan Lluís Vives	Catalan,English	1885-2785		translation,interpreting,law,economics	2005		2006-01-13T11:47:51Z	Law in general. Comparative and uniform law. Jurisprudence,Law,Law,Law and Political Science	Spain	N	http://www.lextra.uji.es/papers/normes.htm		Yes
1860-7977Z	Logistics Journal : Referierte Veröffentlichungen		http://www.logistics-journal.de/?set_language=en&cl=en	WGTL Wissenschaftliche Gesellschaft fuer technische Logistik	German,English	1860-7977		intralogistics,technical logistics	2005		2006-01-24T08:58:20Z	Business,Commerce,Social Sciences,Business and Management,Business and Economics,Manufactures,Technology,Manufactures,Technology and Engineering	Germany	N	http://www.logistics-journal.de/submit-article/		Yes
1807-6971Z	Fênix : Revista de História e Estudos Culturais		http://www.revistafenix.pro.br	Universidade Federal de Uberlândia	Portuguese	1807-6971		history,cultural studies,social history of arts	2004		2006-08-31T11:35:59Z	Latin America. Spanish America,History America,History,History and Archaeology,Literature (General),Language and Literature,Languages and Literatures	Brazil	N	http://www.revistafenix.pro.br/normas.php		Yes
1303-3646Z1306-0961	Journal of Cell and Molecular Biology		http://jcmb.halic.edu.tr/	Halic University	English	1303-3646	1306-0961	cell biology,molecular biology,genetics,microbiology,medicine,agriculture	2002		2006-09-04T12:15:32Z	Cytology,Biology (General),Science,Cytology,Biology,Biology and Life Sciences	Turkey	N	http://www.halic.edu.tr/JCMB/sendarticle.htm		Yes
1735-1308Z1735-546X	Urology Journal		http://www.urologyjournal.org	Shaheed Beheshti University of Medical Sciences	English	1735-1308	1735-546X	urology,endourology,kidney transplantation	2004		2006-09-04T13:37:38Z	Diseases of the genitourinary system. Urology,Specialties of internal medicine,Internal medicine,Medicine,Urology,Medicine (General),Health Sciences	Iran	N	http://www.urologyjournal.org/index.php/uj/about/submissions#authorGuidelines		Yes
1814-8654Z	Raptors Conservation	Pernatye hisniki i ih ohrana	http://ecoclub.nsu.ru/raptors/RC/	Siberian Environmental Center (Novosibirsk) and Center of Field Studies (N.Novgorod)	Russian,English	1814-8654		birds of prey and owls,bird conservation,raptors,raptor conservation	2005		2006-09-13T12:33:37Z	Zoology,Science,Zoology,Biology,Biology and Life Sciences	Russia	N	http://ecoclub.nsu.ru/raptors/RC/guidelines_eng.shtm		Yes
1932-8478Z	Contemporary Aesthetics		http://www.contempaesthetics.org/	Contemporary Aesthetics	English	1932-8478		philosophical issues,aesthetics	2003		2006-09-14T11:00:12Z	Philosophy (General),Philosophy. Psychology. Religion,Philosophy,Philosophy and Religion,Arts in general,Fine Arts,Arts in general,Arts and Architecture	United States	N	http://www.contempaesthetics.org/pages/guidelines.html		Yes
1134-928XZ1578-164X	Gerokomos		http://scielo.isciii.es/scielo.php/script_sci_serial/pid_1134-928X/lng_es/nrm_iso	Ediciones SPA S.L.	Spanish	1134-928X	1578-164X	nursing,geriatrics	2006		2006-09-14T14:28:46Z	Geriatrics,Special situations and conditions,Internal medicine,Medicine,Internal medicine,Medicine (General),Health Sciences,Nursing,Medicine,Nursing,Health Sciences	Spain	N	http://scielo.isciii.es/revistas/geroko/einstruc.htm		Yes
0102-3098Z	Revista Brasileira de Estudos de População		http://www.scielo.br/scielo.php/script_sci_serial/pid_0102-3098/lng_en/nrm_iso	Associação Brasileira de Estudos Populacionais	Portuguese	0102-3098		demography,population studies	2005		2006-09-14T16:22:05Z	Economic theory. Demography,Social Sciences,Economics,Business and Economics	Brazil	N	http://www.scielo.br/revistas/rbepop/pinstruc.htm	by-nc	Yes
0972-1177Z	JK Science : Journal of Medical Education & Research		http://www.jkscience.org/	JK Science	English	0972-1177		medicine	2004		2006-09-21T09:33:13Z	Medicine (General),Medicine,Medicine (General),Health Sciences	India	N	http://www.jkscience.org/guidelines.php		Yes
1823-6243Z	International Journal of Asia-Pacific Studies	IJAPS	http://ijaps.usm.my/	USM Press	English	1823-6243		humanities,social sciences	2005		2006-09-27T09:16:31Z	General Works,Multidisciplinary,General Works	Malaysia	N	http://ijaps.usm.my/?page_id=742		Yes
0124-5996Z	Revista de Economía Institucional		http://www.economiainstitucional.com/	Universidad Externado de Colombia	Spanish	0124-5996		political economy,economy and philosophy,law and economics,economic history,theory of games,institutional economics	1999		2006-09-29T11:44:49Z	Economic theory. Demography,Social Sciences,Economics,Business and Economics	Colombia	N	http://www.economiainstitucional.com/eng/about_journal/guidelines.htm	by	Yes
0120-0011Z	Revista Facultad de Medicina de la Universidad Nacional de Colombia		http://www.scielo.org.co/scielo.php?script=sci_serial&pid=0120-0011&lng=pt&nrm=iso	Universidad Nacional de Colombia	Spanish,English	0120-0011		medical sciences	2005		2006-09-29T11:54:57Z	Medicine (General),Medicine,Medicine (General),Health Sciences	Colombia	N	http://www.scielo.org.co/revistas/rfmun/iinstruc.htm	by	Yes
1809-239XZ	Revista Brasileira de Gestão e Desenvolvimento Regional	G&DR	http://www.rbgdr.net	Universidade de Taubaté	Portuguese,Spanish,English,French	1809-239X		regional planning,urban planning,regional sustainable development,planning techniques,management techniques,decision making processes	2005		2006-10-05T09:33:42Z	Environmental sciences,Geography. Anthropology. Recreation,Environmental Sciences,Earth and Environmental Sciences,Management. Industrial management,Industries. Land use. Labor,Social Sciences,Business and Management,Business and Economics	Brazil	N	http://www.rbgdr.net/032009/normas.html		Yes
1681-5726Z	Alfa Redi : Revista de Derecho Informático	Alfa-Redi: Computer Law Magazine	http://www.alfa-redi.org	Comunidad Alfa-Redi	Spanish,Portuguese,English	1681-5726		computer law,information society	1998		2006-10-13T10:13:17Z	Law in general. Comparative and uniform law. Jurisprudence,Law,Law,Law and Political Science,Electronic computers. Computer science,Instruments and machines,Mathematics,Science,Computer Science,Technology and Engineering	Peru	N			Yes
1478-2715Z2042-8189	Journal of the Royal College of Physicians of Edinburgh		http://www.rcpe.ac.uk/journal/archive.php	Royal College of Physicians of Edinburgh	English	1478-2715	2042-8189	general medicine,current medicine,reviews	2002		2006-10-18T13:46:59Z	Medicine (General),Medicine,Medicine (General),Health Sciences	United Kingdom	N	http://www.rcpe.ac.uk/journal/contributers.php		Yes
1677-1966Z2179-8451	Tendências em Matemática Aplicada e Computacional	TEMA	http://www.sbmac.org.br/tema	Sociedade Brasileira de Matemática Aplicada e Computacional	Portuguese,English	1677-1966	2179-8451	computational mathematics,applied mathematics	2000		2006-10-19T10:00:02Z	Mathematics,Science,Mathematics,Mathematics and Statistics	Brazil	N	http://www.sbmac.org.br/publi_tema.php		Yes
0122-0268Z1909-0544	Revista Mvz Cordoba		http://apps.unicordoba.edu.co/revistas/revistamvz/index.htm	Universidad de Cordoba	Spanish,English	0122-0268	1909-0544	veterinary medicine,zoonoses,public health,aquiculture,biology	2000		2006-10-19T16:07:10Z	Veterinary medicine,Animal culture,Agriculture,Animal Sciences,Agriculture and Food Sciences	Colombia	Y	http://apps.unicordoba.edu.co/revistas/revistamvz/publique.htm		Yes
0003-9500Z	Der Archivar : Mitteilungsblatt für Deutsches Archivwesen		http://www.archive.nrw.de/archivar/	Landesarchiv Nordrhein-Westfalen	German	0003-9500		records-management,history	1999		2006-10-24T16:16:20Z	Diplomatics. Archives. Seals,Auxiliary sciences of history,Diplomatics. Archives. Seals,History and Archaeology	Germany	N	http://www.archive.nrw.de/archivar/hinweis/index.html		Yes
1813-3339Z	Malta Medical Journal		http://www.mmj-web.org/	University of Malta	English	1813-3339		medicine	2002		2006-10-30T16:20:27Z	Medicine (General),Medicine,Medicine (General),Health Sciences	Malta	N	http://www.um.edu.mt/umms/mmj/ita.php		Yes
0354-0596Z1854-1089	Dela		http://revije.ff.uni-lj.si/Dela	University of Ljubljana	Slovenian,English,German	0354-0596	1854-1089	geography,physical geography,human geography,Slovene geography	2002		2006-11-08T17:31:34Z	Geography (General),Geography. Anthropology. Recreation,Geography,Earth and Environmental Sciences	Slovenia	N	http://revije.ff.uni-lj.si/Dela/about/submissions#onlineSubmissions		Yes
0006-2006Z1292-8399	Bulletin des bibliothèques de France	BBF	http://bbf.enssib.fr	French School of Librarianship and Information Science	French	0006-2006	1292-8399	library,information science,publishing,information literacy	1985		2006-11-10T17:35:01Z	Bibliography. Library science. Information resources,Library and Information Science,Social Sciences	France	N	http://bbf.enssib.fr/soumettre-un-article		Yes
1745-0322Z	CEBE Transactions	Transactions of the Centre for Education in the Built Environment	http://cebe.cf.ac.uk/transactions/index.php	Cardiff University	English	1745-0322		education,built-environment pedagogy	2004		2006-11-20T13:51:18Z	Special aspects of education,Education,Education,Social Sciences,Architecture,Fine Arts,Architecture,Arts and Architecture	United Kingdom	N	http://cebe.cf.ac.uk/transactions/submission.php		Yes
1536-7207Z	Translation Journal		http://translationjournal.net/journal/	Accurapid, NY	English,Spanish,French,German,Italian	1536-7207		translation studies,translators,languages	1997		2006-11-23T16:42:52Z	Philology. Linguistics,Language and Literature,Linguistics,Languages and Literatures	United States	N	http://translationjournal.net/journal/00papers.htm		Yes
1668-5024Z	Hologramática		http://www.hologramatica.com.ar	Universidad Nacional de Lomas de Zamora	Spanish,English	1668-5024		social science,literature,education	2004		2006-12-01T17:02:00Z	Communication. Mass media,Philology. Linguistics,Language and Literature,Media and communication,Social Sciences	Argentina	N	http://www.cienciared.com.ar/ra/revista.php?wid=3&sef=24&eid=4&NombreSeccion=INSTRUCCIONES A LOS AUTORES&Accion=VerFijas&T=11&sid=0		Yes
1749-8546Z	Chinese Medicine		http://www.cmjournal.org/home	BioMed Central	English	1749-8546		herbal medicine,health food,clinical nutrition,acupuncture,energy research,medical education,cultural exchange	2006		2006-12-05T12:46:55Z	Medicine (General),Medicine,Medicine (General),Health Sciences	United Kingdom	N	http://www.cmjournal.org/info/instructions/default.asp	by	Yes
1889-7231Z1578-6730	Nómadas		http://pendientedemigracion.ucm.es/info/nomadas/	Universidad Complutense de Madrid	Spanish	1889-7231	1578-6730	sociology	1999		2005-08-24T07:48:23Z	Sociology (General),Social Sciences,Sociology,Social Sciences	Spain	N	http://pendientedemigracion.ucm.es/info/nomadas/		Yes
1697-2600Z	International Journal of Clinical and Health Psychology		http://www.redalyc.org/revista.oa?id=337	Asociación Española de Psicología Conductual (AEPC)	Castilian,English,Portuguese	1697-2600		psychology	2004		2005-08-24T07:48:23Z	Psychology,Philosophy. Psychology. Religion,Psychology,Social Sciences	Spain	Y	http://redalyc.org/redalyc/media/normas/normcol337.html		Yes
0186-1840Z	El Cotidiano		http://www.redalyc.org/revista.oa?id=325	Universidad Autónoma Metropolitana, Azcapotzalco	Spanish	0186-1840		sociology	2000		2005-08-24T07:48:23Z	Sociology (General),Social Sciences,Sociology,Social Sciences	Mexico	Y	http://redalyc.org/redalyc/media/normas/normcol325.html		Yes
1133-0104Z	Anuario de Historia de la Iglesia		http://www.redalyc.org/revista.oa?id=355	Universidad de Navarra	Spanish,English	1133-0104		theology,church history	2000		2005-08-24T07:48:23Z	History (General),History (General) and history of Europe,History,History and Archaeology	Spain	Y	http://redalyc.org/redalyc/media/normas/normcol355.html		Yes
1712-851XZ	Journal of Research Practice	JRP	http://jrp.icaap.org/	Athabasca University Press	English	1712-851X		research practice,research education,research design,open inquiry,innovations in research	2005		2005-09-07T16:48:15Z	General Works,Multidisciplinary,General Works	Canada	N	http://jrp.icaap.org/index.php/jrp/about/submissions#authorGuidelines	by-nc	Yes
1025-5583Z1609-9419	Anales de la Facultad de Medicina		http://www.scielo.org.pe/scielo.php?script=sci_serial&lng=es&pid=1025-5583&nrm=iso	Universidad Nacional Mayor de San Marcos	Spanish	1025-5583	1609-9419	medical sciences	2003		2005-09-07T17:09:43Z	Medicine (General),Medicine,Medicine (General),Health Sciences	Peru	N	http://www.scielo.org.pe/revistas/afm/einstruc.htm		Yes
1554-5210Z	International Journal of Progressive Education		http://www.inased.org/ijpe.htm	International Association of Educators	English,Chinese,Spanish,Turkish	1554-5210		policy analysis,critical pedagogy,multicultural education,new literacies,postmodernism,globalization and education	2005		2005-09-09T14:04:26Z	Theory and practice of education,Education,Education,Social Sciences	United States	N	http://www.inased.org/ijpesi.htm		Yes
1414-0594Z	Revista ACB		http://revistaacb.emnuvens.com.br/racb/index	Associação Catarinense de Bibliotecários - ACB	Portuguese	1414-0594		information science,librarianship,documentation,archives	1996		2005-09-13T11:07:27Z	Bibliography. Library science. Information resources,Library and Information Science,Social Sciences	Brazil	N	http://revista.acbsc.org.br/index.php/racb/about/submissions#authorGuidelines	by-nc	Yes
1565-043XZ	Hadashot Arkheologiyot – Excavations and Surveys in Israel		http://www.hadashot-esi.org.il/index_eng.asp	Israel Antiquities Authority	Hebrew,English	1565-043X		excavations	2004		2005-09-13T14:26:38Z	Archaeology,Auxiliary sciences of history,Archaeology,History and Archaeology	Israel	NY	http://www.hadashot-esi.org.il/Instructions_eng.asp		Yes
1614-2373Z	Swahili-Forum		http://www.uni-leipzig.de/~afrika/swafo/	Johannes Gutenberg Universität Mainz	English,Swahili,German,French	1614-2373		Swahili,humanities,language,literature,anthropology,history,sociology,East Africa,Indian Ocean,Diaspora	1994		2005-09-13T16:31:57Z	Languages and literature of Eastern Asia, Africa, Oceania,Language and Literature,Languages and Literatures,Anthropology,Geography. Anthropology. Recreation,Anthropology,Social Sciences	Germany	N	http://www.uni-leipzig.de/~afrika/swafo/index.php/contributors-guidelines		Yes
1698-6180Z1886-7995	Journal of Iberian Geology		http://www.ucm.es/info/estratig/journal.htm	Universidad Complutense de Madrid	English,Spanish,French,Portuguese	1698-6180	1886-7995	earth sciences,Mediterranean geology,Latin-American geology	1977		2005-09-21T13:49:59Z	Geology,Science,Earth Sciences,Earth and Environmental Sciences	Spain	N	http://revistas.ucm.es/index.php/JIGE/about/submissions#authorGuidelines		Yes
1609-4913Z	Asia-Pacific Forum on Science Learning and Teaching		http://www.ied.edu.hk/apfslt/	Hong Kong Institute of Education	English,Chinese	1609-4913		science education,teaching,learning	2000		2005-09-22T14:59:01Z	Education (General),Education,Education,Social Sciences	Hong Kong	N	http://www.ied.edu.hk/apfslt/info/index.htm		Yes
2008-7756Z	Journal of Periodontology & Implant Dentistry		http://dentistry.tbzmed.ac.ir/jpid/index.php/jpid	Tabriz University of Medical Sciences	English	2008-7756		oral implant,periodontlogy,dentistry	2009		2010-03-15T15:54:36Z	Dentistry,Medicine,Dentistry,Health Sciences	Iran	N	http://dentistry.tbzmed.ac.ir/jpid/index.php/jpid/about/submissions#authorGuidelines		Yes
1547-5840Z1547-5867	Issues in Informing Science and Information Technology		http://iisit.org/	Informing Science Institute	English	1547-5840	1547-5867	information science	2004		2005-09-27T12:01:57Z	Information technology,Industrial engineering. Management engineering,Technology (General),Technology,Computer Science,Technology and Engineering,Bibliography. Library science. Information resources,Library and Information Science,Social Sciences	United States	N	http://InSITE.nu		Yes
1825-7208Z	Crossroads		http://www.webasa.org/crossroads.htm	ASA	English	1825-7208		international affairs,globalization,political economy,economics,political science,business,law	2001		2005-09-30T09:57:23Z	Political science (General),Political science,Political Science,Law and Political Science	Italy	N	http://www.webasa.org/Pubblicazioni/instructions_contributors.pdf		Yes
1723-0330Z	Anestesia Pediatrica e Neonatale	Italian Internet Journal of Pediatric and Neonatal Anesthesia	http://www.anestesiapediatrica.it	Anestesia Pediatrica e Neonatale	Italian,English,Spanish	1723-0330		pediatrics,neonatal anesthesia,pediatric anesthesia	2003		2005-10-06T13:54:09Z	Anesthesiology,Surgery,Medicine,Anesthesiology,Medicine (General),Health Sciences,Pediatrics,Medicine,Pediatrics,Medicine (General),Health Sciences	Italy	N	http://www.anestesiapediatrica.it/		Yes
1762-6110Z	Astérion		http://asterion.revues.org	École Normale Supérieure de Lyon	French	1762-6110		history of philosophy,history of political ideas	2003		2005-10-10T13:15:18Z	Philosophy (General),Philosophy. Psychology. Religion,Philosophy,Philosophy and Religion	France	N	http://asterion.revues.org/document30.html		Yes
0718-0209Z0718-2244	Magallania		http://www.scielo.cl/scielo.php?script=sci_serial&lng=en&pid=0718-2244&nrm=iso	Universidad de Magallanes	Spanish	0718-0209	0718-2244	social sciences,humanities	2005		2005-10-13T14:44:05Z	Social sciences (General),Social Sciences,Social Sciences	Chile	N	http://www.scielo.cl/revistas/magallania/iinstruc.htm		Yes
0918-1067Z1880-2273	Journal of the Acarological Society of Japan		http://www.jstage.jst.go.jp/browse/acari	The Acarological Society of Japan	Japanese,English	0918-1067	1880-2273	acarology	2000		2005-10-21T14:17:28Z	Zoology,Science,Zoology,Biology,Biology and Life Sciences	Japan	NY	http://acari.ac.affrc.go.jp/en/journal/submission.php		Yes
1519-5538Z	Campos - Revista de Antropologia Social		http://ojs.c3sl.ufpr.br/ojs2/index.php/campos/index	Universidade Federal do Paraná	Portuguese,Spanish	1519-5538		ethnography	2001		2005-10-24T15:04:52Z	Anthropology,Geography. Anthropology. Recreation,Anthropology,Social Sciences	Brazil	N	http://ojs.c3sl.ufpr.br/ojs2/index.php/campos/about/submissions#authorGuidelines		Yes
1342-4580Z1347-6114	Plant Biotechnology		http://www.jstage.jst.go.jp/browse/plantbiotechnology	Japanese Society for Plant Cell and Molecular Biology	English	1342-4580	1347-6114	plant tissue culture,molecular biology,cell technology,botany	2001		2005-10-26T15:26:35Z	Plant culture,Agriculture,Plant Sciences,Agriculture and Food Sciences,Biotechnology,Chemical technology,Technology,Biotechnology,Life Sciences,Biology and Life Sciences	Japan	Y			Yes
1090-6924Z	Journal of Cave and Karst Studies		http://www.caves.org/pub/journal/	National Speleological Society	English	1090-6924		cave research,karst research,biospeleology,anthropology,life sciences,conservation	1996		2005-10-27T08:59:32Z	General Works,Multidisciplinary,General Works	United States	N	http://www.caves.org/pub/journal/Guide.htm		Yes
1130-0531Z1988-2548	Didáctica (Lengua y Literatura)		http://revistas.ucm.es/index.php/DIDA/issue/archive	Universidad Complutense de Madrid	Spanish,English,French	1130-0531	1988-2548	language,literature,oral tradition,linguistics,education	1989		2005-10-28T10:30:18Z	General Works,Multidisciplinary,General Works	Spain	N	http://revistas.ucm.es/index.php/DIDA/about/submissions#authorGuidelines		Yes
0185-2760Z	Revista de la Educación Superior		http://publicaciones.anuies.mx/revista	Universidades e Instituciones de Educación Superior de México	Spanish	0185-2760		higher education	1972		2005-10-31T09:40:00Z	Education (General),Education,Education,Social Sciences	Mexico	N			Yes
1593-2214Z	Reti Medievali Rivista	RM Rivista	http://www.rivista.retimedievali.it/	Firenze University Press	Italian,English,French,German	1593-2214		historiography	2000		2005-10-31T11:13:43Z	Medieval history,History (General),History (General) and history of Europe,History,History and Archaeology	Italy	N	http://www.rmojs.unina.it/index.php/rm/about/submissions	by	Yes
1551-4218Z	Online Journal of Health Ethics		http://aquila.usm.edu/ojhe/	University of Mississippi Medical Center	English	1551-4218		medical ethics,bioethics,health,ethics	2004		2005-11-02T14:11:39Z	Medical philosophy. Medical ethics,Medicine (General),Medicine,Medicine (General),Health Sciences	United States	NY	http://aquila.usm.edu/ojhe/styleguide.html		Yes
1806-1222Z1806-1230	Revista Brasileira em Promoção da Saúde		http://www.unifor.br/rbps	Universidade de Fortaleza	Portuguese,Spanish,English	1806-1222	1806-1230	health,public health,health promotion,interdisciplinary communication,primary care	2003		2005-11-02T15:33:05Z	Public aspects of medicine,Medicine,Public Health,Health Sciences	Brazil	N	http://www.unifor.br/images/pdfs/rbps/rbps-instrucoesaosautores.pdf	by	Yes
1860-7950Z	Libreas : Library Ideas		http://www.libreas.eu	Institut für Bibliothekswissenschaft Berlin	German	1860-7950		librarianship,education	2005		2005-11-03T14:56:48Z	Bibliography. Library science. Information resources,Library and Information Science,Social Sciences	Germany	N	http://www.ib.hu-berlin.de/~libreas/libreas_neu/formal/legal.htm	by	Yes
0872-3419Z	Revista da Faculdade de Letras : Sociologia	Sociologia	http://ler.letras.up.pt/site/default.aspx?qry=id04id111&sum=sim	Universidade do Porto	Portuguese	0872-3419		social sciences,social theory	1991		2008-06-23T13:14:21Z	Sociology (General),Social Sciences,Sociology,Social Sciences	Portugal	N	http://ler.letras.up.pt/uploads/ficheiros/5499.pdf		Yes
1874-2629Z	Open Geology Journal		http://www.bentham.org/open/togeoj/	Bentham open	English	1874-2629		geochemistry,geophysics,plate tectonics,sedimentology,palaeontology,geomorphology,volcanology	2007		2008-06-20T11:48:04Z	Geology,Science,Earth Sciences,Earth and Environmental Sciences	United States	Y	http://www.benthamscience.com/open/togeoj/MSandI.htm		Yes
0824-2577Z	Informal Logic		http://www.informallogic.ca	University of Windsor	English	0824-2577		reasoning,argumentation,informal logic	2006		2008-05-27T14:11:18Z	Logic,Philosophy. Psychology. Religion,Philosophy,Philosophy and Religion	Canada	N	http://ojs.uwindsor.ca/ojs/leddy/index.php/informal_logic/about/submissions#onlineSubmissions		Yes
1874-401XZ	Open Fish Science Journal		http://www.bentham.org/open/tofishsj/	Bentham open	English	1874-401X		fisheries research	2008		2008-09-29T16:51:58Z	Aquaculture. Fisheries. Angling,Agriculture,Aquaculture and Fisheries,Agriculture and Food Sciences	United States	Y	http://www.benthamscience.com/open/tofishsj/MSandI.htm		Yes
2176-9451Z2177-6709	Dental Press Journal of Orthodontics		http://www.scielo.br/scielo.php?script=sci_serial&pid=2176-9451&lng=en&nrm=iso	Dental Press Editora	English,Portuguese	2176-9451	2177-6709	orthodontics,dentistry,oral health	2010		2010-11-09T15:10:25Z	Dentistry,Medicine,Dentistry,Health Sciences	Brazil	N	http://www.scielo.br/revistas/dpjo/iinstruc.htm	by-nc	Yes
0033-698XZ0718-4883	RLA : Revista de Lingüística Teórica y Aplicada		http://www.scielo.cl/scielo.php?script=sci_serial&pid=0718-4883&lng=es&nrm=iso	Universidad de Concepción	Spanish,Portuguese,English	0033-698X	0718-4883	theoretical linguistics,applied linguistics	2006		2008-04-13T14:10:38Z	Philology. Linguistics,Language and Literature,Linguistics,Languages and Literatures	Chile	NY	http://www.scielo.cl/revistas/rla/einstruc.htm		Yes
1392-0340Z2029-0551	Pedagogika	Pedagogy Studies	http://www.vpu.lt/pedagogika/	Vilnius Pedagogical University	Lithuanian	1392-0340	2029-0551	teaching,pedagogy,sociology,psychology	2004		2008-06-19T13:20:40Z	Theory and practice of education,Education,Education,Social Sciences	Lithuania	N	http://www.biblioteka.vpu.lt/pedagogika/pedagogika/infoaut.htm		Yes
1330-0113Z1849-0360	Socijalna Ekologija	Časopis za Ekološku Misao i Sociologijska Istraživanja Okoline	http://hrcak.srce.hr/socijalna-ekologija?lang=hr	Hrvatsko sociološko društvo	Croatian	1330-0113	1849-0360	social ecology,social research,sustainable development,bioethics	2004		2008-04-13T14:10:45Z	Environmental sciences,Geography. Anthropology. Recreation,Environmental Sciences,Earth and Environmental Sciences	Croatia	N	http://hrcak.srce.hr/upute/guide_authors_Socijalna_ekologija_-_Journal_for_Environmental_Thought_and_Sociological_Research.pdf		Yes
1874-8376Z	Open Acoustics Journal		http://www.bentham.org/open/toacoj/	Bentham open	English	1874-8376		shock and sound vibration,speech,ultrasonic acoustics,quantum acoustics	2008		2008-06-17T17:45:00Z	Acoustics. Sound,Physics,Science,Acoustics,Physics (General),Physics and Astronomy	United States	Y	http://www.benthamscience.com/open/toacoj/MSandI.htm		Yes
0120-2596Z2323-0622	Lecturas de Economía		http://aprendeenlinea.udea.edu.co/revistas/index.php/lecturasdeeconomia	Universidad de Antioquia	English,Spanish	0120-2596	2323-0622	econometrics,economic history,history of economic thought,macroeconomics,microeconomics	2003		2008-06-16T11:14:38Z	Economic history and conditions,Social Sciences,Economics,Business and Economics	Colombia	N	http://aprendeenlinea.udea.edu.co/revistas/index.php/lecturasdeeconomia/about/submissions		Yes
1415-6555Z1982-7849	Revista de Administração Contemporânea	RAC	http://anpad.org.br/periodicos/content/frame_base.php?revista=1	ANPAD - Associação Nacional dos Programas de Pós-graduação em Administração	Portuguese,English	1415-6555	1982-7849	administration	1997		2008-04-14T16:38:38Z	Management. Industrial management,Industries. Land use. Labor,Social Sciences,Business and Management,Business and Economics	Brazil	N	http://www.scielo.br/revistas/rac/iinstruc.htm	by-nc-nd	Yes
0104-1290Z1984-0470	Saúde e Sociedade		http://www.scielo.br/scielo.php?script=sci_serial&pid=0104-1290&lng=pt&nrm=iso	Universidade de São Paulo	Portuguese,English,Spanish	0104-1290	1984-0470	health practices,public health	1992		2008-04-15T13:08:18Z	Public aspects of medicine,Medicine,Public Health,Health Sciences	Brazil	N	http://www.scielo.br/revistas/sausoc/pinstruc.htm	by-nc	Yes
0120-2812Z	Acta Agronómica		http://www.scielo.org.co/scielo.php?script=sci_serial&pid=0120-2812&lng=en&nrm=iso	Universidad Nacional de Colombia Sede Palmira	Spanish,Portuguese,English	0120-2812		crops systems,animal production systems,food production,food consumption	2007		2008-04-17T12:08:41Z	Plant culture,Agriculture,Plant Sciences,Agriculture and Food Sciences,Agriculture (General),Agriculture,Agriculture (General),Agriculture and Food Sciences	Colombia	N	http://www.scielo.org.co/revistas/acag/iinstruc.htm	by	Yes
1179-5557Z	Clinical Medicine Insights : Pathology		http://www.la-press.com/clinical-medicine-insights-pathology-journal-j54	Libertas Academica	English	1179-5557		histopathology,hematology,parasitology	2010		2012-03-23T08:30:32Z	Pathology,Medicine,Pathology,Medicine (General),Health Sciences	New Zealand	Y	http://www.la-press.com/author_resources.php?folder_id=121	by	Yes
1715-9261Z	Analyses : Revue de Critique et de Théorie Littéraire	@nalyses	http://www.revue-analyses.org/index.php	University of Ottawa	French	1715-9261		literature,critique,literary theory	2006		2008-07-10T13:02:04Z	Literature (General),Language and Literature,Languages and Literatures	Canada	N	http://www.revue-analyses.org/index.php?page=protocole		Yes
1874-2262Z	Open Immunology Journal		http://www.bentham.org/open/toij/	Bentham open	English	1874-2262		microbiology	2008		2008-05-30T14:34:44Z	Immunologic diseases. Allergy,Specialties of internal medicine,Internal medicine,Medicine,Allergy and Immunology,Medicine (General),Health Sciences	United States	Y	http://www.benthamscience.com/open/toij/MSandI.htm		Yes
1545-8725Z	Californian Journal of Health Promotion		http://www.cjhp.org/	Californian Journal of Health Promotion	English	1545-8725		health education,health care	2003		2008-05-14T14:48:12Z	Public aspects of medicine,Medicine,Public Health,Health Sciences	United States	N	http://www.cjhp.org/guidelines.htm		Yes
1687-6121Z1687-630X	Gastroenterology Research and Practice		http://www.hindawi.com/journals/grp/	Hindawi Publishing Corporation	English	1687-6121	1687-630X	gastroenterology,hepatology,immunology,molecular biology,genetics	2008		2008-05-15T09:56:59Z	Diseases of the digestive system. Gastroenterology,Specialties of internal medicine,Internal medicine,Medicine,Gastroenterology,Medicine (General),Health Sciences	Egypt	Y	http://www.hindawi.com/journals/grp/apc/	by	Yes
1687-6261Z1687-627X	Advances in Acoustics and Vibration		http://www.hindawi.com/journals/aav/	Hindawi Publishing Corporation	English	1687-6261	1687-627X	sound,vibration	2008		2008-05-15T13:39:31Z	Acoustics. Sound,Physics,Science,Acoustics,Physics (General),Physics and Astronomy	Egypt	Y	http://www.hindawi.com/journals/aav/apc/	by	Yes
1874-3501Z	Open Psychology Journal		http://bentham.org/open/topsyj/	Bentham open	English	1874-3501		clinical psychology,experimental psychology,mathematical psychology,psychoanalysis	2008		2008-05-16T17:30:48Z	Psychology,Philosophy. Psychology. Religion,Psychology,Social Sciences	United States	Y	http://www.benthamscience.com/open/topsyj/MSandI.htm		Yes
1874-205XZ	Open Neurology Journal		http://www.benthamscience.com/open/toneuj/index.htm	Bentham open	English	1874-205X		neurological disorders	2007		2008-05-16T17:41:22Z	Neurology. Diseases of the nervous system,Neurosciences. Biological psychiatry. Neuropsychiatry,Internal medicine,Medicine,Neurology,Medicine (General),Health Sciences	United States	Y	http://www.benthamscience.com/open/toneuj/MSandI.htm		Yes
1718-9977Z	Les Ateliers de l’Éthique		http://creum.umontreal.ca/categorie/les-ateliers-de-lethique/	Université de Montréal	English,French	1718-9977		applied ethics,public policy,normative analysis	2006		2008-05-19T11:48:28Z	Ethics,Philosophy. Psychology. Religion,Philosophy,Philosophy and Religion	Canada	N	http://www.creum.umontreal.ca/IMG/pdf_instructions.pdf	by-nc-nd	Yes
1646-8880Z	E-Fabulations : e-Journal of Children's Literature	E-fabulações : Revista Electrónica de Literatura Infantil	http://ler.letras.up.pt/site/default.aspx?qry=id05id1159&sum=sim	Universidade do Porto	Portuguese,English	1646-8880		children's literature	2007		2008-05-19T17:43:20Z	Literature (General),Language and Literature,Languages and Literatures	Portugal	N			Yes
1984-0292Z	Fractal : Revista de Psicologia		http://www.scielo.br/scielo.php?script=sci_serial&pid=1984-0292&lng=pt&nrm=iso	Universidade Federal Fluminense	Portuguese,Spanish	1984-0292		psychological theory	2008		2009-12-10T14:25:08Z	Psychology,Philosophy. Psychology. Religion,Psychology,Social Sciences	Brazil	N	http://www.scielo.br/revistas/fractal/pinstruc.htm		Yes
1415-7314Z	Engevista		http://www.uff.br/engevista/seer/index.php/engevista/index	Universidade Federal Fluminense	Portuguese,English,Spanish	1415-7314		industrial engineering,mechanical engineering,civil engineering,chemical engineering,agronomics	2003		2008-05-23T10:49:30Z	Engineering (General). Civil engineering (General),Technology,General and Civil Engineering,Technology and Engineering	Brazil	N	http://www.uff.br/engevista/seer/index.php/engevista/about/submissions#onlineSubmissions		Yes
1925-6531Z1925-654X	Maladies Chroniques et Blessures au Canada		http://www.phac-aspc.gc.ca/publicat/cdic-mcbc/index-fra.php	Agence de la Santé Publique du Canada	French	1925-6531	1925-654X	chronic diseases,epidemiology,public health,biostatistics,behavioral sciences,economics,health services	2011		2013-11-22T14:34:36Z	Internal medicine,Medicine,Internal medicine,Medicine (General),Health Sciences	Canada	N	http://www.phac-aspc.gc.ca/publicat/cdic-mcbc/autinfo-fra.php		Yes
0717-7925Z0718-915X	Revista de la Construcción		http://www.uc.cl/construc_civil/site/edic/base/port/revistas.html	Pontificia Universidad Católica de Chile	Spanish	0717-7925	0718-915X	building activity,construction management,civil construction engineering,building materials	2002		2008-05-27T08:36:12Z	Engineering (General). Civil engineering (General),Technology,General and Civil Engineering,Technology and Engineering	Chile	N	http://www.uc.cl/construc_civil/html/publique.html		Yes
1178-4407Z	Journal of Health Informatics in Developing Countries		http://www.jhidc.org/	University of Otago	English	1178-4407		information science,medicine,health care	2007		2008-05-30T13:43:40Z	Bibliography. Library science. Information resources,Library and Information Science,Social Sciences,Medicine (General),Medicine,Medicine (General),Health Sciences	New Zealand	Y	http://www.jhidc.org/index.php/jhidc/about/editorialPolicies#custom0		Yes
1913-1844Z1913-1852	Modern Applied Science		http://ccsenet.org/journal/index.php/mas/	Canadian Center of Science and Education	English	1913-1844	1913-1852	chemistry,environmental sciences,management,economics,physics,mathematics,statistics,geology,engineering,computer and information sciences,biology	2007		2008-06-02T12:45:33Z	Science (General),Science,Science (General),Science General	Canada	Y	http://www.ccsenet.org/submission	by	Yes
0078-5466Z1899-7015	Optica Applicata		http://www.if.pwr.wroc.pl/~optappl/	Wroclaw University of Technology	English	0078-5466	1899-7015	applied and theoretical optics,optical technology,photonics,optoelectronics	2004		2008-06-04T17:07:26Z	Optics. Light,Physics,Science,Optics and Lights,Physics (General),Physics and Astronomy	Poland	N	http://www.if.pwr.wroc.pl/~optappl/instructions.php		Yes
1009-3419Z1999-6187	Chinese Journal of Lung Cancer	CJLC	http://www.lungca.org	Chinese Anti-Cancer Association, Chinese Antituberculosis Association	Chinese	1009-3419	1999-6187	lung cancer,clinical research,laboratory research	2008		2008-06-05T14:24:25Z	Neoplasms. Tumors. Oncology. Including cancer and carcinogens,Internal medicine,Medicine,Oncology,Medicine (General),Health Sciences	China	Y	http://www.lungca.org/index.php?journal=01&page=article&op=view&path%5B%5D=10.3779%2Fj.issn.1009-3419.2008.01.033&path%5B%5D=40	by	Yes
1818-0353Z1818-0361	Science in School		http://www.scienceinschool.org/	EIROforum	multiple languages	1818-0353	1818-0361	science education,teaching activities	2006		2008-06-12T11:27:58Z	Theory and practice of education,Education,Education,Social Sciences	Germany	N	http://www.scienceinschool.org/submissions/authors		Yes
1997-5422Z	International Journal of Systems Signal Control and Engineering Application		http://medwelljournals.com/journalhome.php?jid=1997-5422	Medwell Online	English	1997-5422		system analysis,modeling,simulation,signal processing,control synthesis	2008		2008-06-12T14:31:39Z	Mathematics,Science,Mathematics,Mathematics and Statistics,Engineering (General). Civil engineering (General),Technology,General and Civil Engineering,Technology and Engineering	Pakistan	Y	http://medwelljournals.com/guidetoauthor.php?jid=1997-5422		Yes
1736-3918Z1736-3926	Acta Societatis Martensis		http://www.martens.ee/acta/en/	Martens Society	English,Estonian	1736-3918	1736-3926	international law,international relations,human rights	2005		2008-06-13T10:49:39Z	International relations,Political science,Political Science,Law and Political Science,Law in general. Comparative and uniform law. Jurisprudence,Law,Law,Law and Political Science	Estonia	N	http://www.martens.ee/acta/en/for-authors/		Yes
1970-2221Z	Ricerche di Pedagogia e Didattica		http://rpd.cib.unibo.it/	University of Bologna	Italian,English	1970-2221		social science education,teaching education,education management,IT,multiculturalism,educational and social services	2006		2008-07-11T14:33:02Z	Education (General),Education,Education,Social Sciences	Italy	N	http://rpd.unibo.it/about/submissions#authorGuidelines	by-nc-nd	Yes
1874-2300Z	Open Behavioral Science Journal		http://www.bentham.org/open/tobsj/	Bentham open	English	1874-2300		cognitive science	2007		2008-07-18T12:19:36Z	Psychology,Philosophy. Psychology. Religion,Psychology,Social Sciences	United States	Y	http://www.benthamscience.com/open/tobsj/MSandI.htm		Yes
0960-6068Z	Ukrainian Journal of Physics	UJP	http://ujp.bitp.kiev.ua/	National Academy of Sciences of Ukraine	English	0960-6068		experimental physics,theoretical physics	2003		2008-07-21T12:48:22Z	Physics,Science,Physics (General),Physics and Astronomy	Ukraine	N	http://ujp.bitp.kiev.ua/		Yes
0370-6583Z	Rodriguésia		http://www.jbrj.gov.br/publica/rodriguesia/	Instituto de Pesquisas Jardim Botânico do Rio de Janeiro	Portuguese,English and Spanish	0370-6583		systematics,taxonomy,floristics,flora	2004		2008-11-26T16:37:51Z	Botany,Science,Botany,Biology,Biology and Life Sciences	Brazil	N	http://www.jbrj.gov.br/publica/rodriguesia/normas_espanhol.htm		Yes
1730-4237Z1898-0198	Folia Oeconomica Stetinensia		http://www.degruyter.com/view/j/foli	Versita	English	1730-4237	1898-0198	economic theory,statistics,business,economics,finance,management	2007		2008-12-11T16:16:02Z	Finance,Social Sciences,Business and Management,Business and Economics	Poland	N	http://www.degruyter.com/view/supplement/s18980198_Instruction_for_Authors.pdf		Yes
1234-2238Z2083-8506	Psychology of Language and Communication		http://www.degruyter.com/view/j/plc	Versita	English	1234-2238	2083-8506	communication,communication disorders,cognitive psychology,language education,psycholinguistics	2008		2008-12-18T11:02:42Z	Psychology,Philosophy. Psychology. Religion,Psychology,Social Sciences	Poland	N	http://www.degruyter.com/view/j/plc		Yes
1318-2099Z1581-3207	Radiology and Oncology		http://www.degruyter.com/view/j/raon	Versita	English	1318-2099	1581-3207	medicine,health science,biomedical,life science	2007		2008-12-18T11:22:13Z	Medicine (General),Medicine,Medicine (General),Health Sciences	Slovenia	N	http://www.degruyter.com/view/supplement/s15813207_Instructions_for_Authors.pdf		Yes
1506-9427Z1898-7761	Vegetable Crops Research Bulletin		http://www.degruyter.com/view/j/vcrb	Versita	English	1506-9427	1898-7761	agricultural science,plant sciences,plant genetics,plant genomics,plant pahology	2007		2008-12-18T12:55:20Z	Agriculture (General),Agriculture,Agriculture (General),Agriculture and Food Sciences	Poland	N	http://www.degruyter.com/view/j/vcrb		Yes
1687-8000Z1687-8019	Journal of Biophysics		http://www.hindawi.com/journals/jbp/	Hindawi Publishing Corporation	English	1687-8000	1687-8019	biophysics	2008		2009-01-16T13:36:54Z	Biology (General),Science,Biology,Biology and Life Sciences	Egypt	Y	http://www.hindawi.com/journals/jbp/apc/	by	Yes
2090-2026Z2090-2034	International Journal of Inorganic Chemistry		http://www.hindawi.com/journals/ijic/	Hindawi Publishing Corporation	English	2090-2026	2090-2034	inorganic chemistry	2009		2009-12-23T14:53:42Z	Inorganic chemistry,Chemistry,Science,Inorganic Chemistry,Chemistry	Egypt	Y	http://www.hindawi.com/journals/ijic/apc/	by	Yes
0974-6846Z0974-5645	Indian Journal of Science and Technology		http://www.indjst.org/	Indian Society for Education and Environment	English	0974-6846	0974-5645	technology,biology	2007		2009-01-26T18:36:21Z	Science (General),Science,Science (General),Science General	India	Y	http://www.indjst.org/manu.html		Yes
0103-6971Z1981-8637	RGO : Revista Gaúcha de Odontologia		http://www.revistargo.com.br/index.php	Mundi Brasil Gráfica e Editora Ltda.	Portuguese,English,Spanish	0103-6971	1981-8637	public health,clinical dentistry,odontology	2000		2009-01-30T12:08:28Z	Dentistry,Medicine,Dentistry,Health Sciences	Brazil	N	http://www.revistargo.com.br/submissions.php#guidelines		Yes
1975-5937Z	Journal of Educational Evaluation for Health Professions	JEEHP	http://jeehp.org/	National Health Personnel Licensing Examination Board of the Republic of Korea	English	1975-5937		medical education,educational evaluation,high stakes examination,computerized adaptive testing,psychometrics	2006		2009-02-12T09:18:31Z	Special aspects of education,Education,Education,Social Sciences,Medicine (General),Medicine,Medicine (General),Health Sciences	South Korea	N	http://jeehp.org/index.php?body=instruction		Yes
2247-8051Z2247-806X	Journal of Physical Education and Sport	JPES	http://efsupit.ro/	University of Pitesti	English	2247-8051	2247-806X	sport science,physical education,biomechanics,kinesiology,coaching,adapted physical activity	2011		2012-03-22T12:55:08Z	Sports,Recreation. Leisure,Geography. Anthropology. Recreation,Sports Science,Social Sciences	Romania	Y	http://efsupit.ro/index.php?option=com_content&view=article&id=17&Itemid=13	by	Yes
1998-8125Z	Southern African Business Review		http://www.unisa.ac.za/default.asp?Cmd=ViewContent&ContentID=22335	University of South Africa	English	1998-8125		management sciences,economics,accountancy,industrial psychology	2004		2009-02-24T13:34:02Z	Management. Industrial management,Industries. Land use. Labor,Social Sciences,Business and Management,Business and Economics	South Africa	N	http://www.unisa.ac.za/default.asp?Cmd=ViewContent&ContentID=22338		Yes
1874-2130Z	Open Ecology Journal		http://www.bentham.org/open/toecolj/	Bentham open	English	1874-2130		ecological theory	2008		2009-03-03T17:07:01Z	Ecology,Biology (General),Science,Ecology,Earth and Environmental Sciences	United States	Y	http://www.benthamscience.com/open/toecolj/MSandI.htm		Yes
1876-4002Z	Open Waste Management Journal		http://www.bentham.org/open/towmj/	Bentham open	English	1876-4002		waste technology research,industrial waste,residual waste	2008		2009-03-04T18:03:08Z	Environmental technology. Sanitary engineering,Technology,Environmental Technology,Technology and Engineering	United States	Y	http://www.benthamscience.com/open/towmj/MSandI.htm		Yes
1662-2510Z	Madagascar Conservation & Development	Journal MCD	http://www.journalmcd.com/index.php/mcd/index	Madagascar Wildlife Conservation, Jane Goodall Institute Switzerland	English,French	1662-2510		Madagascar,conservation,sustainable development,biodiversity,livelihoods	2006		2009-03-10T11:39:38Z	Ecology,Biology (General),Science,Ecology,Earth and Environmental Sciences	Madagascar	N	http://www.journalmcd.com/index.php/mcd/about/submissions#authorGuidelines	by	Yes
1301-2894Z	Yerbilimleri : An Earth Sciences Journal		http://www.yerbilimleri.hacettepe.edu.tr	Hacettepe University	Turkish,English	1301-2894		geology,geophysics,hydrogeology,engineering geology,geomorphology	2000		2009-03-10T13:00:05Z	Geology,Science,Earth Sciences,Earth and Environmental Sciences	Turkey	N	http://www.yerbilimleri.hacettepe.edu.tr/guide.shtml		Yes
0120-3584Z1900-7760	Desarrollo y Sociedad		http://economia.uniandes.edu.co/es/investigaciones_y_publicaciones/cede/publicaciones/revista_desarrollo_y_sociedad	Universidad de los Andes	Spanish,English	0120-3584	1900-7760	Latin-American economic development	1995		2009-03-12T16:12:03Z	Economic history and conditions,Social Sciences,Economics,Business and Economics	Colombia	N	http://economia.uniandes.edu.co/es/investigaciones_y_publicaciones/cede/publicaciones/revista_desarrollo_y_sociedad/guia_para_autores		Yes
2228-110XZ1736-5899	Studia Philosophica Estonica		http://www.spe.ut.ee/ojs/index.php/spe/index	University of Tartu	English,Estonian	2228-110X	1736-5899	metaphysics,epistemology,ethics,history of philosophy	2008		2009-03-12T16:30:45Z	Philosophy (General),Philosophy. Psychology. Religion,Philosophy,Philosophy and Religion	Estonia	N	http://www.spe.ut.ee/ojs/index.php/spe/information/authors		Yes
2065-3913Z2065-3921	Theoretical and Empirical Researches in Urban Management	Cercetari practice si teoretice in managementul urban	http://um.ase.ro/	Research Centre in Public Administration and Public Services, Academy of Economic Studies	English,Romanian	2065-3913	2065-3921	urban management,urban policies,local governance	2006		2009-03-16T08:43:15Z	Political science (General),Political science,Political Science,Law and Political Science	Romania	N	http://um.ase.ro/submission.htm		Yes
1822-511XZ	Šiauliai Mathematical Seminar		http://siauliaims.su.lt/	Šiauliai University	English	1822-511X		all fields of mathematics	2002		2009-03-16T09:24:58Z	Mathematics,Science,Mathematics,Mathematics and Statistics	Lithuania	N	http://siauliaims.su.lt/index.php?option=com_content&view=article&id=3&Itemid=4		Yes
1936-0487Z	Online Journal of Rural Research & Policy		http://ojrrp.org/	New Prairie Press	English	1936-0487		rural issues,Great Plains,rural policy	2006		2009-03-16T11:44:31Z	Social sciences (General),Social Sciences,Social Sciences,Environmental sciences,Geography. Anthropology. Recreation,Environmental Sciences,Earth and Environmental Sciences	United States	N	http://ojrrp.org/journals/ojrrp/information/authors		Yes
0973-709XZ	Journal of Clinical and Diagnostic Research		http://www.jcdr.net/	Dr. Hemant Jain and Premchand Shantidevi Research foundation	English	0973-709X		medicine,medical research,developing countries	2007		2009-03-16T13:22:24Z	Medicine (General),Medicine,Medicine (General),Health Sciences	India	N	http://www.jcdr.net/instruction_authors.asp		Yes
1827-000XZ	inTRAlinea : Online Translation Journal		http://www.intralinea.it	University of Bologna	Italian,English,French,German,Spanish,Dutch	1827-000X		translation studies,languages,cultures,translating and interpreting,intercultural studies	1998		2009-03-18T10:57:27Z	Philology. Linguistics,Language and Literature,Linguistics,Languages and Literatures	Italy	N	http://www.intralinea.it/forum/index.php		Yes
1578-0007Z	Ar@cne : Revista de Recursos en Internet sobre Geografia y Ciencias Sociales		http://www.raco.cat/index.php/Aracne	Universitat de Barcelona	Catalan,Spanish,English,Portuguese	1578-0007		electronic resources,geography links,social science links	1997		2009-03-18T11:17:43Z	Geography (General),Geography. Anthropology. Recreation,Geography,Earth and Environmental Sciences,Social sciences (General),Social Sciences,Social Sciences	Spain	N	http://www.raco.cat/index.php/Aracne/about/submissions#authorGuidelines		Yes
1307-671XZ	Duzce Universitesi Tip Fakültesi Dergisi	Duzce University Medical Journal	http://www.duzce.edu.tr/tipdergi/	Düzce Üniversity	Turkish,English	1307-671X		general medicine,clinical medicine,experimental medicine	2006		2009-03-24T09:11:10Z	Medicine (General),Medicine,Medicine (General),Health Sciences	Turkey	N	http://www.duzce.edu.tr/tipdergi/dosya/ybilgi.pdf		Yes
1779-0980Z1961-859X	Études Caribeénnes		http://etudescaribeennes.revues.org/	Université Antilles-Guyane	French,English,Spanish	1779-0980	1961-859X	Caribbean,tourism,insularity,sustainable development	2005		2009-03-24T09:43:40Z	Geography (General),Geography. Anthropology. Recreation,Geography,Earth and Environmental Sciences	Martinique	N	http://etudescaribeennes.revues.org/document812.html		Yes
1913-6005Z	MediaTropes		http://www.mediatropes.com	University of Toronto Libraries	English	1913-6005		media studies,cultural studies,media theory,philosophy of technology	2008		2009-03-24T11:00:59Z	Communication. Mass media,Philology. Linguistics,Language and Literature,Media and communication,Social Sciences,Philosophy (General),Philosophy. Psychology. Religion,Philosophy,Philosophy and Religion	Canada	N	http://www.mediatropes.com/index.php/Mediatropes/about/submissions#authorGuidelines	by-nc-nd	Yes
1874-3811Z	Open Astronomy Journal		http://bentham.org/open/toaaj/	Bentham Open	English	1874-3811		astrophysics,cosmology	2008		2009-03-25T10:59:19Z	Astronomy,Science,Astronomy (General),Physics and Astronomy	United States	Y	http://www.benthamscience.com/open/toaaj/MSandI.htm		Yes
1931-8006Z	Hispanic Issues On Line		http://spanport.cla.umn.edu/publications/HispanicIssues/Online_Main.html	Hispanic Issues On Line	English,Spanish,Portuguese	1931-8006		Hispanic and Lusophone literature,culture,linguistics	2006		2009-03-27T14:19:18Z	Literature (General),Language and Literature,Languages and Literatures	United States	N			Yes
1179-5514Z	Clinical Medicine Insights : Endocrinology and Diabetes		http://www.la-press.com/clinical-medicine-insights-endocrinology-and-diabetes-journal-j65	Libertas Academica	English	1179-5514		disorders of the endocrine system	2010		2012-03-23T07:49:02Z	Diseases of the endocrine glands. Clinical endocrinology,Specialties of internal medicine,Internal medicine,Medicine,Internal medicine,Medicine (General),Health Sciences	New Zealand	Y	http://www.la-press.com/author_resources.php?folder_id=121	by	Yes
1178-217XZ	Clinical Medicine : Geriatrics		http://www.la-press.com/clinical-medicine-geriatrics-journal-j73	Libertas Academica	English	1178-217X		elderly patients,prevention of geriatric disorders	2008	2009	2009-03-30T14:33:56Z	Geriatrics,Special situations and conditions,Internal medicine,Medicine,Internal medicine,Medicine (General),Health Sciences	New Zealand	Y	http://www.la-press.com/author_resources.php?folder_id=121	by	Yes
0970-2113Z0974-598X	Lung India		http://www.lungindia.com/	Medknow Publications	English	0970-2113	0974-598X	respiratory medicine,immunology,intensive care,sleep medicine,thoracic surgery,thoracic imaging,occupational health	2004		2009-03-30T15:03:53Z	Diseases of the respiratory system,Specialties of internal medicine,Internal medicine,Medicine,Internal medicine,Medicine (General),Health Sciences	India	N	http://www.lungindia.com/contributors.asp	by-nc-sa	Yes
1178-623XZ	Magnetic Resonance Insights		http://www.la-press.com/magnetic-resonance-insights-journal-j115	Libertas Academica	English	1178-623X		medical imaging,MRI	2008		2009-03-30T17:39:11Z	Medicine (General),Medicine,Medicine (General),Health Sciences	New Zealand	Y	http://www.la-press.com/author_resources.php?folder_id=121	by	Yes
1433-5239Z	American Studies Journal	ASJ	http://www.asjournal.org/	Center for United States Studies	English	1433-5239		American history,literature,culture	2007		2009-03-31T09:16:53Z	American literature,Language and Literature,Languages and Literatures,America,History America,History,History and Archaeology	Germany	N	http://www.asjournal.org/submissions/index.html		Yes
1114-6834Z	Bulletin de l’Institut Scientifique : Section Sciences de la Terre	Earth Sciences	http://www.israbat.ac.ma/spip.php?article17	Université Mohammed V Agdal	French,English	1114-6834		geosciences,geophysics,palaeobiology,environmental geology	2001		2009-04-02T14:49:43Z	Geology,Science,Earth Sciences,Earth and Environmental Sciences	Morocco	N	http://www.israbat.ac.ma/spip.php?article9		Yes
1414-0055Z	Revista de História Regional		http://www.revistas.uepg.br/index.php?journal=rhr&page=index	Universidade Estadual de Ponta Grossa	Portuguese	1414-0055		regional history,culture	1996		2009-04-09T12:01:35Z	History (General),History (General) and history of Europe,History,History and Archaeology	Brazil	N	http://www.revistas2.uepg.br/index.php/rhr/about/submissions#authorGuidelines		Yes
0849-1089Z1916-8659	Éducation et Francophonie		http://www.acelf.ca/c/revue/index.php	Association Canadienne d’Éducation de Langue Française	French	0849-1089	1916-8659	education,French,pedagogy,teaching	1996		2009-04-09T12:40:22Z	Special aspects of education,Education,Education,Social Sciences	Canada	N	http://www.acelf.ca/c/revue/appel-articles/directives.php		Yes
1178-6949Z	Advances and Applications in Bioinformatics and Chemistry		http://www.dovepress.com/computational-biology-and-chemistry-advances-and-applications-journal	Dove Medical Press	English	1178-6949		computational biomodelling,bioinformatics,computational genomics,molecular modelling	2008		2009-04-09T13:46:03Z	Biochemistry,Organic chemistry,Chemistry,Science,Biochemistry,Life Sciences,Biology and Life Sciences,Biology (General),Science,Biology,Biology and Life Sciences	United Kingdom	Y	http://www.dovepress.com/author_guidelines.php?folder_id=222		Yes
1934-6344Z1934-6352	International Journal of Agricultural and Biological Engineering	IJABE	http://www.ijabe.org	Association of Overseas Chinese Agricultural, Biological and Food Engineers(AOCABFE), Chinese Society of Agricultural Engineering(CSAE)	English	1934-6344	1934-6352	agricultural engineering,biological engineering,food science and technology,information and electrical technology,bioenvironmental engineering,renewable energy	2008		2009-04-14T19:00:31Z	Agriculture (General),Agriculture,Agriculture (General),Agriculture and Food Sciences	China	Y	http://www.ijabe.org/index.php/ijabe/about/submissions#authorGuidelines	by-nc	Yes
1178-7023Z	Clinical and Experimental Gastroenterology		http://www.dovepress.com/clinical-and-experimental-gastroenterology-journal	Dove Medical Press	English	1178-7023		pathology,pathophysiology,gastrointestinal disease,liver,gall bladder,pancreas	2008		2009-04-15T15:56:27Z	Internal medicine,Medicine,Internal medicine,Medicine (General),Health Sciences	United Kingdom	Y	http://www.dovepress.com/journal_pricing_bands.php?journal_id=34		Yes
2035-7362Z	Doctor Virtualis		http://riviste.unimi.it/index.php/DoctorVirtualis/index	Università degli Studi de Milano	Italian,English	2035-7362		history of philosophy,Middle Ages,Medieval thought	2002		2009-04-16T09:48:39Z	Philosophy (General),Philosophy. Psychology. Religion,Philosophy,Philosophy and Religion,Medieval history,History (General),History (General) and history of Europe,History,History and Archaeology	Italy	N	http://riviste.unimi.it/index.php/DoctorVirtualis/about/submissions#authorGuidelines		Yes
1178-7090Z	Journal of Pain Research		http://www.dovepress.com/journal-of-pain-research-journal	Dove Medical Press	English	1178-7090		pain research,prevention of pain,management of pain	2008		2009-04-16T14:26:36Z	Medicine (General),Medicine,Medicine (General),Health Sciences	United Kingdom	Y	http://www.dovepress.com/author_guidelines.php?folder_id=222		Yes
1179-1470Z	Medical Devices : Evidence and Research		http://www.dovepress.com/medical-devices-evidence-and-research-journal	Dove Medical Press	English	1179-1470		surgery,anesthesia,instrumentation,diagnostics,analytics,active and non-active implantable technology	2008		2009-04-16T14:37:09Z	Medical technology,Medicine (General),Medicine,Medicine (General),Health Sciences	United Kingdom	Y	http://www.dovepress.com/author_guidelines.php?folder_id=222		Yes
1821-1291Z	Bulletin of Mathematical Analysis and Applications		http://www.bmathaa.org	University of Prishtina	English	1821-1291		functional analysis,mathematical analysis,applied mathematical analysis	2009		2009-04-17T11:56:39Z	Mathematics,Science,Mathematics,Mathematics and Statistics	Kosova	Y	http://91.187.98.171/bmathaa/page_charges.html		Yes
1958-9247Z	Les Dossiers du Grihl		http://dossiersgrihl.revues.org/	Groupe de Recherches Interdisciplinaires sur l'Histoire du Littéraire - CRH	French	1958-9247		social history,17th century,cultural history,history of literature,history of thought	2007		2009-04-20T17:53:25Z	History (General),History (General) and history of Europe,History,History and Archaeology	France	N	http://dossiersgrihl.revues.org/		Yes
1886-5887Z	Revista de Bioética y Derecho		http://revistes.ub.edu/index.php/RBD/	Universitat de Barcelona	Spanish,English,Catalan	1886-5887		human rights,ethics	2004		2009-05-11T14:21:17Z	Law in general. Comparative and uniform law. Jurisprudence,Law,Law,Law and Political Science	Spain	N	http://revistes.ub.edu/index.php/RBD/about/submissions#authorGuidelines		Yes
1178-704XZ	The Application of Clinical Genetics		http://www.dovepress.com/the-application-of-clinical-genetics-journal	Dove Medical Press	English	1178-704X		population genetics,natural history,management and mechanism of genetic disease	2008		2009-04-21T14:07:31Z	Genetics,Biology (General),Science,Genetics,Biology,Biology and Life Sciences	New Zealand	Y	http://www.dovepress.com/journal_pricing_bands.php?journal_id=36		Yes
1994-540XZ2077-2025	Asian Journal of Algebra		http://www.scialert.net/jindex.php?issn=1994-540x	Asian Network for Scientific Information	English	1994-540X	2077-2025	algebra,applied algebra,mathematics	2008		2009-04-24T12:02:57Z	Mathematics,Science,Mathematics,Mathematics and Statistics	Pakistan	Y	http://www.scialert.net/guide.php?issn=1994-540x		Yes
1301-0085Z1309-0275	Pamukkale Universitesi Egitim Fakultesi Dergisi	Pamukkale University Journal of Education	http://pauegitimdergi.pau.edu.tr/	Pamukkale University	Turkish,English	1301-0085	1309-0275	educational studies,teaching	1996		2009-04-24T14:56:10Z	Education (General),Education,Education,Social Sciences	Turkey	N	http://pauegitimdergi.pau.edu.tr/Defaultx.aspx?SID=4		Yes
1918-5901Z	Global Media Journal : Canadian Edition		http://www.gmj.uottawa.ca/	University of Ottawa	English,French	1918-5901		international communication,intercultural communication,global media studies,journalism,new media	2008		2009-04-27T13:17:17Z	Communication. Mass media,Philology. Linguistics,Language and Literature,Media and communication,Social Sciences	Canada	N	http://www.gmj.uottawa.ca/for-authors_e.html		Yes
1302-6763Z	Journal of Qafqaz University		http://journal.qu.edu.az/	Qafqaz University	Azeri,English,Turkish,Russian	1302-6763		Azerbaijan,economy,social sciences	1997		2009-04-27T17:17:18Z	Science (General),Science,Science (General),Science General	Azerbaijan	N	http://journal.qu.edu.az/content.php?page=instructions		Yes
1687-8760Z1687-8779	International Journal of Analytical Chemistry		http://www.hindawi.com/journals/ijac/	Hindawi Publishing Corporation	English	1687-8760	1687-8779	analytical chemistry	2009		2009-04-30T09:36:35Z	Analytical chemistry,Chemistry,Science,Analytical Chemistry,Chemistry	Egypt	Y	http://www.hindawi.com/journals/ijac/apc/	by	Yes
0253-9268Z	Revista Cubana de Fisica	The Cuban Physics Journal	http://www.fisica.uh.cu/biblioteca/revcubfis/	Sociedad Cubana de Fisica y Facultad de Fisica Universidad de la Habana	English,Spanish	0253-9268		physics	1981		2009-04-30T09:44:32Z	Physics,Science,Physics (General),Physics and Astronomy	Cuba	N	http://www.fisica.uh.cu/biblioteca/revcubfis/index.php/autores		Yes
1687-8787Z1687-8795	International Journal of Biomaterials		http://www.hindawi.com/journals/ijbm/	Hindawi Publishing Corporation	English	1687-8787	1687-8795	biomaterials	2009		2009-04-30T09:45:09Z	Biology (General),Science,Biology,Biology and Life Sciences	Egypt	Y	http://www.hindawi.com/journals/ijbm/apc/	by	Yes
1687-9740Z1687-9759	International Journal of Pediatrics		http://www.hindawi.com/journals/ijped/	Hindawi Publishing Corporation	English	1687-9740	1687-9759	pediatric research	2009		2009-04-30T09:54:48Z	Pediatrics,Medicine,Pediatrics,Medicine (General),Health Sciences	Egypt	Y	http://www.hindawi.com/journals/ijped/apc/	by	Yes
1687-8191Z1687-8205	Journal of Toxicology		http://www.hindawi.com/journals/jt/	Hindawi Publishing Corporation	English	1687-8191	1687-8205	toxicology	2009		2009-04-30T10:36:19Z	Toxicology. Poisons,Public aspects of medicine,Medicine,Public Health,Health Sciences	Egypt	Y	http://www.hindawi.com/journals/jt/apc/	by	Yes
1994-7879Z2077-2041	Asian Journal of Crop Science		http://scialert.net/jindex.php?issn=1994-7879	Asian Network for Scientific Information	English	1994-7879	2077-2041	plant physiology,production,genetics,breeding	2009		2009-04-30T13:50:33Z	Plant culture,Agriculture,Plant Sciences,Agriculture and Food Sciences	Pakistan	Y	http://scialert.net/guide.php?issn=1994-7879		Yes
1646-1223Z2182-5114	Enterprise and Work Innovation Studies		http://iet.fct.unl.pt/index.php?option=com_content&task=view&id=28&Itemid=51	Centro de Investigação em Inovação Empresarial e do Trabalho, Universidade Nova de Lisboa	English	1646-1223	2182-5114	innovation,work organisation,industrial economics	2005		2009-05-05T12:43:31Z	Industries. Land use. Labor,Social Sciences,Social Sciences	Portugal	N			Yes
1834-3147Z	The Python Papers		http://ojs.pythonpapers.org/index.php/tpp	The Python Papers Anthology	English	1834-3147		programming,computer science,software engineering	2006		2009-05-05T14:15:11Z	Electronic computers. Computer science,Instruments and machines,Mathematics,Science,Computer Science,Technology and Engineering	Australia	N	http://ojs.pythonpapers.org/index.php/tpp/about/submissions#authorGuidelines	by-sa	Yes
1840-4529Z	International Journal of Collaborative Research on Internal Medicine & Public Health		http://www.iomcworld.com/ijcrimph/index.htm	DRUNPP Sarajevo	English	1840-4529		internal medicine,epidemiological research,general medicine	2009		2009-05-07T14:26:25Z	Public aspects of medicine,Medicine,Public Health,Health Sciences	Bosnia	CON	http://www.iomcworld.com/ijcrimph/guidelines.htm	by-nc-nd	Yes
2008-2053Z2008-4072	Journal of Injury and Violence Research		http://jivresearch.org/jivr/index.php/jivr/index	Kermanshah University of Medical Sciences	English	2008-2053	2008-4072	domestic violence,road safety,child safety,disaster control	2009		2009-05-08T11:52:55Z	Internal medicine,Medicine,Internal medicine,Medicine (General),Health Sciences	Iran	N	http://jivresearch.org/jivr/index.php/jivr/about/submissions#authorGuidelines		Yes
2073-607XZ	International Journal of Communication Networks and Information Security	IJCNIS	http://ijcnis.kust.edu.pk/index	Kohat University of Science and Technology	English	2073-607X		network technologies,internet,multimedia communications,broadband,security models	2009		2009-05-08T14:17:36Z	Electronic computers. Computer science,Instruments and machines,Mathematics,Science,Computer Science,Technology and Engineering	Pakistan	N	http://ijcnis.kust.edu.pk/about/submissions#authorGuidelines		Yes
1916-9795Z1916-9809	Journal of Mathematics Research		http://ccsenet.org/jmr	Canadian Center of Science and Education	English	1916-9795	1916-9809	applied mathematics,computational mathematics,probability and statistics,algebra,geometry	2009		2009-05-08T14:52:31Z	Mathematics,Science,Mathematics,Mathematics and Statistics	Canada	Y	http://www.ccsenet.org/journal/index.php/jmr/about/submissions#authorFees	by	Yes
1868-1026Z1868-4874	Journal of Current Chinese Affairs		http://hup.sub.uni-hamburg.de/giga/jcca	German Institute of Global and Area Studies, (GIGA)	English,German	1868-1026	1868-4874	China,politics,social science,culture,economics	2009		2009-05-13T11:11:13Z	Political science (General),Political science,Political Science,Law and Political Science	Germany	N	http://journals.giga-hamburg.de/index.php/jcca/about/submissions	by-nd	Yes
1454-0320Z	Economia : Seria Management	Economia : Management	http://www.management.ase.ro/reveconomia/eng/index.htm	Editura ASE	English,Romanian	1454-0320		economics,management,business administration,quantitative methods for management,economic development	2000		2009-05-13T15:23:04Z	Economic theory. Demography,Social Sciences,Economics,Business and Economics	Romania	N	http://www.management.ase.ro/reveconomia/eng/index.htm		Yes
0392-100XZ1827-675X	Acta Otorhinolaryngologica Italica		http://www.actaitalica.it	Pacini Editore SpA	English,Italian	0392-100X	1827-675X	otorhinolaryngology,head surgery,neck surgery	2003		2009-05-15T09:31:33Z	Otorhinolaryngology,Medicine,Otorhinolaryngology,Medicine (General),Health Sciences	Italy	CON	http://www.actaitalica.it/main/instruction.htm		Yes
1877-7015Z1877-7023	Journal of Archaeology in the Low Countries		http://www.jalc.nl	Amsterdam University Press	English	1877-7015	1877-7023	Lower Rhine basin,prehistory,Roman Age,Middle Ages,recent times	2009		2009-05-19T08:28:34Z	Archaeology,Auxiliary sciences of history,Archaeology,History and Archaeology	Netherlands	N	http://dpc.uba.uva.nl/cgi/t/text/text-idx?c=jalc;sid=2e3ddaa51b1da33a0d8a1a998defac04;tpl=guidelines.tpl		Yes
1307-9298Z	International Electronic Journal of Elementary Education	IEJEE	http://www.iejee.com/	International Electronic Journal of Elementary Education	English	1307-9298		science education,development of reading,subject teaching,teacher training	2008		2009-05-20T14:37:53Z	Education (General),Education,Education,Social Sciences	Turkey	N	http://www.iejee.com/authors.html		Yes
1937-8904Z	Theological Librarianship	An Online Journal of the American Theological Library Association	http://journal.atla.com/ojs/index.php/theolib	American Theological Library Association	English	1937-8904		theology,library,religion	2008		2009-05-25T11:19:05Z	Practical Theology,Philosophy. Psychology. Religion,Religion,Philosophy and Religion,Bibliography. Library science. Information resources,Library and Information Science,Social Sciences	United States	N	http://journal.atla.com/ojs/index.php/theolib/about/submissions#authorGuidelines	by-nc-nd	Yes
1176-6344Z1178-2048	Vascular Health and Risk Management		http://www.dovepress.com/vascular-health-and-risk-management-journal	Dove Medical Press	English	1176-6344	1178-2048	maintenance of vascular health,monitoring vascular disease,prevention of vascular disease,treatment of vascular disease	2009		2009-05-25T14:39:54Z	Diseases of the circulatory (Cardiovascular) system,Specialties of internal medicine,Internal medicine,Medicine,Cardiovascular,Medicine (General),Health Sciences	United Kingdom	Y	http://www.dovepress.com/author_guidelines.php?folder_id=222		Yes
2073-2740Z	Global Media Journal : African Edition		http://globalmedia.journals.ac.za	Stellenbosch University	English	2073-2740		journalism,globalization of media	2007		2009-05-27T17:39:27Z	Communication. Mass media,Philology. Linguistics,Language and Literature,Media and communication,Social Sciences	South Africa	N	http://globalmedia.journals.ac.za/pub/about/submissions#authorGuidelines		Yes
1843-570XZ2067-7677	AGORA International Journal of Juridical Sciences		http://www.juridicaljournal.univagora.ro/?page=home	AGORA University Publishing House	English	1843-570X	2067-7677	criminal law,civil law,forensic medicine,criminology	2007		2009-05-28T17:09:09Z	Law in general. Comparative and uniform law. Jurisprudence,Law,Law,Law and Political Science	Romania	N	http://www.juridicaljournal.univagora.ro/?page=instructions		Yes
1678-1244Z2236-9929	Cadernos da FUCAMP		http://www.cadernos.fucamp.edu.br	FUCAMP	Portuguese	1678-1244	2236-9929	pedagogy,culture	2002		2009-06-01T17:11:54Z	Education (General),Education,Education,Social Sciences	Brazil	N	http://www.fucamp.edu.br/editora/index.php/cadernos/about/submissions#authorGuidelines		Yes
1913-0465Z	Spontaneous Generations : Journal for the History and Philosophy of Science		http://jps.library.utoronto.ca/index.php/SpontaneousGenerations	University of Toronto	English	1913-0465		philosophy of science,history of science	2007		2009-06-03T16:31:24Z	Philosophy (General),Philosophy. Psychology. Religion,Philosophy,Philosophy and Religion,History (General),History (General) and history of Europe,History,History and Archaeology	Canada	N	http://jps.library.utoronto.ca/index.php/SpontaneousGenerations/about/submissions#authorGuidelines		Yes
2327-5324Z1941-3394	Journal of Instructional Pedagogies	JIP	http://www.aabri.com/jip.html	Academic and Business Research Institute	English	2327-5324	1941-3394	instructional technology,distance learning	2008		2009-06-04T16:03:03Z	Education (General),Education,Education,Social Sciences	United States	Y	http://www.aabri.com/pubpolicy.html		Yes
0034-7590Z2178-938X	RAE : Revista de Administração de Empresas		http://www.scielo.br/scielo.php?script=sci_serial&pid=0034-7590&lng=en&nrm=iso	Fundação Getúlio Vargas	Portuguese,English	0034-7590	2178-938X	social sciences,administration,management	1997		2009-06-12T13:41:15Z	Social sciences (General),Social Sciences,Social Sciences	Brazil	N	http://www.scielo.br/revistas/rae/iinstruc.htm	by	Yes
2090-0007Z2090-0015	Journal of Transplantation		http://www.hindawi.com/journals/jtran/	Hindawi Publishing Corporation	English	2090-0007	2090-0015	transplantations	2009		2009-06-18T14:25:56Z	Surgery,Medicine,Surgery,Medicine (General),Health Sciences	Egypt	Y	http://www.hindawi.com/journals/jtran/apc/	by	Yes
1687-9260Z1687-9279	International Journal of Rheumatology		http://www.hindawi.com/journals/ijr/	Hindawi Publishing Corporation	English	1687-9260	1687-9279	rheumatology	2009		2009-06-18T15:17:57Z	Diseases of the musculoskeletal system,Specialties of internal medicine,Internal medicine,Medicine,Internal medicine,Medicine (General),Health Sciences	Egypt	Y	http://www.hindawi.com/journals/ijr/apc/	by	Yes
0188-4611Z	Investigaciones Geográficas		http://www.redalyc.org/revista.oa?id=569	Universidad Nacional Autónoma de México	Spanish,English,Portuguese	0188-4611		geography	1996		2007-05-29T17:03:17Z	Geography (General),Geography. Anthropology. Recreation,Geography,Earth and Environmental Sciences	Mexico	Y	http://redalyc.org/redalyc/media/normas/normcol569.html		Yes
0185-1918Z	Revista Mexicana de Ciencias Políticas y Sociales		http://www.redalyc.org/revista.oa?id=421	Universidad Nacional Autónoma de México	Spanish	0185-1918		politics and government,social conditions	2001		2007-05-30T10:36:19Z	Political science (General),Political science,Political Science,Law and Political Science,Social sciences (General),Social Sciences,Social Sciences	Mexico	Y	http://redalyc.org/redalyc/media/normas/normcol421.html		Yes
0104-0707Z1980-265X	Texto & Contexto Enfermagem		http://www.redalyc.org/revista.oa?id=714	Universidad Federal de Santa Catarina	Portuguese,Spanish,English	0104-0707	1980-265X	nursing,health sciences	2004		2007-05-30T11:50:35Z	Nursing,Medicine,Nursing,Health Sciences	Brazil	N	http://redalyc.org/redalyc/media/normas/normcol714.html		Yes
1026-0463Z	Integración & Comercio	Integration &Trade Journal	http://www.iadb.org/intal/icom/33/esp/e_home.html	INTAL, Instituto para la Integración de América Latina y el Caribe	English,Spanish	1026-0463		integration and trade,regional integration,international trade,Latin America,Caribbean	1996		2007-05-30T11:53:54Z	Commerce,Social Sciences,Business and Management,Business and Economics,International relations,Political science,Political Science,Law and Political Science	Argentina	N	http://www.iadb.org/intal/icom/33/esp/e_contribuciones.html		Yes
1177-6250Z	Gene Regulation and Systems Biology		http://la-press.com/journal.php?journal_id=26	Libertas Academica	English	1177-6250		regulation,signal,genes,systems biology,biology	2007		2007-05-31T10:32:19Z	Biology (General),Science,Biology,Biology and Life Sciences	New Zealand	Y	http://www.la-press.com/author_resources.php?folder_id=121	by	Yes
1177-3936Z	Integrative Medicine Insights		http://la-press.com/journal.php?journal_id=21	Libertas Academica	English	1177-3936		complementary medicine	2006		2007-05-31T14:40:36Z	Medicine (General),Medicine,Medicine (General),Health Sciences	New Zealand	Y	http://www.la-press.com/author_resources.php?folder_id=121	by	Yes
1980-9697Z	Pesquisas em Discurso Pedagógico		http://www.maxwell.lambda.ele.puc-rio.br/rev_discurso.php?strSecao=INDEX	Pontifícia Universidade Católica do Rio de Janeiro	Portuguese,English	1980-9697		language teaching and learning,teaching practices,teacher education	2006		2007-07-04T16:29:54Z	Theory and practice of education,Education,Education,Social Sciences	Brazil	N	http://www.maxwell.lambda.ele.puc-rio.br/rev_discurso.php?strSecao=INDEX		Yes
1809-4783Z	Informação & Sociedade: Estudos		http://www.ies.ufpb.br	Universidade Federal da Paraiba	Portuguese	1809-4783		information science,information technology	1991		2007-07-05T14:49:06Z	Bibliography. Library science. Information resources,Library and Information Science,Social Sciences	Brazil	N	http://www.ies.ufpb.br/ojs2/index.php/ies/about/submissions#authorGuidelines		Yes
0942-2285Z	Journal für Psychologie		http://www.journal-fuer-psychologie.de	Pabst Science Publishers	German	0942-2285		psychology,psychoanalysis,critical psychology,qualitative research	2007		2007-07-05T16:02:01Z	Psychology,Philosophy. Psychology. Religion,Psychology,Social Sciences	Germany	N	http://www.journal-fuer-psychologie.de/index.php/jfp/about/submissions#authorGuidelines		Yes
1657-7027Z	Revista Gerencia y Políticas de Salud		http://rev_gerenc_polit_salud.javeriana.edu.co/	Pontificia Universidad Javeriana	Spanish	1657-7027		public health,health services,ethics and public health,health administration,health policies	2001		2007-07-12T11:57:10Z	Public aspects of medicine,Medicine,Public Health,Health Sciences	Colombia	N	http://www.javeriana.edu.co/fcea/rev_gerenc_polsalud/info_autores.htm		Yes
0973-5070Z	Studies on Ethno-Medicine		http://www.krepublishers.com/02-Journals/S-EM/EM-00-0-000-000-2007-Web/EM-00-0-000-000-2007-1-Cover.htm	Kamla-Raj Enterprises, Delhi	English	0973-5070		ecology,man and health relationship,medical systems,health professionals	2007		2007-07-25T11:40:36Z	Ecology,Biology (General),Science,Ecology,Earth and Environmental Sciences,Medicine (General),Medicine,Medicine (General),Health Sciences	India	Y	http://www.krepublishers.com/02-Journals/S-EM/EM-00-0-000-000-2007-Web/EM-00-0-000-000-2007-4-Inst-Cont.htm	by-nc	Yes
0973-7189Z	Studies on Home and Community Science		http://www.krepublishers.com/02-Journals/S-HCS/HCS-00-0-000-000-2007-Web/HCS-00-0-000-000-2007-1-Cover.htm	Kamla-Raj Enterprises, Delhi	English	0973-7189		ecology,man and health relationship,life sciences,social sciences,health professionals	2007		2007-07-25T11:52:46Z	Ecology,Biology (General),Science,Ecology,Earth and Environmental Sciences,Social sciences (General),Social Sciences,Social Sciences	India	Y	http://www.krepublishers.com/02-Journals/S-HCS/HCS-00-0-000-000-2007-Web/HCS-00-0-000-000-2007-4-Inst-Cont.htm	by-nc	Yes
1677-5449Z1677-7301	Jornal Vascular Brasileiro		http://www.scielo.br/scielo.php?script=sci_serial&pid=1677-5449&lng=en&nrm=iso	Sociedade Brasileira de Angiologia e de Cirurgia Vascular (SBACV)	Portuguese,English,Spanish	1677-5449	1677-7301	vascular surgery,angiology,endovascular surgery	2005		2007-07-31T14:58:01Z	Surgery,Medicine,Surgery,Medicine (General),Health Sciences,Diseases of the circulatory (Cardiovascular) system,Specialties of internal medicine,Internal medicine,Medicine,Cardiovascular,Medicine (General),Health Sciences	Brazil	N	http://www.scielo.br/revistas/jvb/iinstruc.htm	by-nc	Yes
0121-4705Z	Análisis Político		http://www.scielo.org.co/scielo.php?script=sci_serial&pid=0121-4705&lng=pt&nrm=iso	Universidad Nacional de Colombia	Spanish	0121-4705		governance,society,democracy,foreign affairs	2005		2007-08-01T12:26:29Z	Social sciences (General),Social Sciences,Social Sciences,Political science (General),Political science,Political Science,Law and Political Science	Colombia	N	http://www.scielo.org.co/revistas/anpol/iinstruc.htm		Yes
0120-0690Z	Revista Colombiana de Ciencias Pecuarias		http://www.scielo.org.co/scielo.php?script=sci_serial&lng=en&pid=0120-0690&nrm=iso	Universidad de Antioquia	Spanish,English,Portuguese	0120-0690		animal sciences,veterinary sciences	2005		2007-08-01T13:49:14Z	Animal culture,Agriculture,Animal Sciences,Agriculture and Food Sciences	Colombia	N	http://www.scielo.org.co/revistas/rccp/iinstruc.htm		Yes
1307-4733Z	Novitas-ROYAL	Novitas-ROYAL : Research on Youth and Language	http://novitasroyal.org	Novitas-ROYAL	English	1307-4733		foreign language teaching,youth and language,applied linguistics,gender and language	2007		2007-08-08T15:51:54Z	Philology. Linguistics,Language and Literature,Linguistics,Languages and Literatures	Turkey	N	http://novitasroyal.org/submissions.htm		Yes
1304-2947Z	Turkish Journal of Geriatrics		http://geriatri.dergisi.org/index.php3	Geriatrics Society, Ankara	English,Turkish	1304-2947		elderly patients,aging,elderly care	1998		2007-08-10T14:15:19Z	Geriatrics,Special situations and conditions,Internal medicine,Medicine,Internal medicine,Medicine (General),Health Sciences	Turkey	N	http://geriatri.dergisi.org/instructions.php3?id=37		Yes
2190-0493Z2190-0507	Psychological Test and Assessment Modeling		http://www.psychologie-aktuell.com/index.php?id=204	Pabst Science Publishers	English	2190-0493	2190-0507	statistics,psychometrics,psychological assessment	2010		2010-04-01T09:54:35Z	Psychology,Philosophy. Psychology. Religion,Psychology,Social Sciences	Germany	N	http://www.psychologie-aktuell.com/index.php?id=201		Yes
0121-5612Z1900-6004	Colombia Internacional	colomb.int.	http://colombiainternacional.uniandes.edu.co/	Universidad de los Andes (Bogotá)	English,Spanish	0121-5612	1900-6004	Political studies	1988		2007-08-15T14:56:27Z	Political science (General),Political science,Political Science,Law and Political Science	Colombia	N	http://colombiainternacional.uniandes.edu.co/page.php?c=Normas+para+los+autores		Yes
0255-965XZ1842-4309	Notulae Botanicae Horti Agrobotanici Cluj-Napoca		http://www.notulaebotanicae.ro	University of Agricultural Sciences and Veterinary Medicine, Cluj-Napoca	English	0255-965X	1842-4309	plant science,agriculture,horticulture,forestry,biodiversity	1965		2007-08-28T09:34:28Z	Botany,Science,Botany,Biology,Biology and Life Sciences	Romania	Y	http://www.notulaebotanicae.ro/index.php/nbha	by	Yes
1687-5265Z1687-5273	Computational Intelligence and Neuroscience		http://www.hindawi.com/journals/cin/	Hindawi Publishing Corporation	English	1687-5265	1687-5273	neural computing,neural engineering,artificial intelligence	2007		2007-09-03T15:21:47Z	Electronic computers. Computer science,Instruments and machines,Mathematics,Science,Computer Science,Technology and Engineering,Neurosciences. Biological psychiatry. Neuropsychiatry,Internal medicine,Medicine,Neurology,Medicine (General),Health Sciences	Egypt	Y	http://www.hindawi.com/journals/cin/apc/	by	Yes
1750-0044Z1750-0052	Engineering Education		http://journals.heacademy.ac.uk/journal/ened	The Higher Education Academy	English	1750-0044	1750-0052	engineering education,higher education,teaching,learning	2006		2007-09-04T12:56:57Z	Education (General),Education,Education,Social Sciences,Engineering (General). Civil engineering (General),Technology,General and Civil Engineering,Technology and Engineering	United Kingdom	N	http://journals.heacademy.ac.uk/page/ened_submissions	by-nc-nd	Yes
1556-5424Z1556-5750	Higher Education in Review	HER	http://www.higheredinreview.org/	Pennsylvania State University	English	1556-5424	1556-5750	education policy,educational plans	2004		2007-09-21T17:36:07Z	Special aspects of education,Education,Education,Social Sciences	United States	N	http://sites.google.com/site/psuhighereducationinreview/call-for-papers		Yes
1938-4122Z	DHQ	Digital Humanities Quarterly	http://www.digitalhumanities.org/dhq/	Alliance of Digital Humanities	English	1938-4122		humanities,digital media	2007		2007-09-24T14:52:38Z	Communication. Mass media,Philology. Linguistics,Language and Literature,Media and communication,Social Sciences	United States	N	http://www.digitalhumanities.org/dhq/submissions/index.html		Yes
1996-0778Z	African Journal of Biochemistry Research		http://www.academicjournals.org/ajbr	Academic journals	English	1996-0778		biology,physicochemistry	2007		2007-09-24T15:00:19Z	Biochemistry,Organic chemistry,Chemistry,Science,Biochemistry,Life Sciences,Biology and Life Sciences	Nigeria	Y	http://www.academicjournals.org/AJBR/Instructions%20for%20Authors.htm		Yes
1971-8993Z	Frattura ed Integrità Strutturale		http://www.gruppofrattura.it/index.php?option=com_content&task=view&id=46&Itemid=137	Gruppo Italiano Frattura	Italian,English	1971-8993		fracture,materials mechanical behaviour,structures Integrity	2007		2008-03-03T15:48:19Z	Materials of engineering and construction. Mechanics of materials,Electrical engineering. Electronics. Nuclear engineering,Technology,Materials,Technology and Engineering	Italy	N	http://www.gruppofrattura.it/sito/en/journal/description-and-aims	by	Yes
1874-3471Z	Open Medical Imaging Journal		http://www.bentham.org/open/tomij/	Bentham open	English	1874-3471		nuclear medicine,diagnosis	2007		2008-03-04T16:36:56Z	Internal medicine,Medicine,Internal medicine,Medicine (General),Health Sciences	United States	Y	http://www.benthamscience.com/open/tomij/MSandI.htm		Yes
1131-6837Z1988-2157	Cuadernos de Gestión		http://www.ehu.es/cuadernosdegestion/revista/index.php/en	Instituto de Economía Aplicada a la Empresa	Spanish,English	1131-6837	1988-2157	management,finance,marketing,organisation	2001		2008-03-05T16:23:53Z	Economic theory. Demography,Social Sciences,Economics,Business and Economics,Business,Commerce,Social Sciences,Business and Management,Business and Economics	Spain	N	http://www.ehu.es/cuadernosdegestion/revista/index.php/en/submiting-papers		Yes
1936-1912Z	Visual Culture & Gender		http://www.emitto.net/visualculturegender	Hyphen-UnPress	English	1936-1912		visual culture,gender,social class,art education	2006		2008-03-06T09:21:42Z	Visual arts,Fine Arts,Visual Arts,Arts and Architecture,Women. Feminism,The family. Marriage. Woman,Social Sciences,Gender Studies,Social Sciences	United States	N	http://vcg.emitto.net/		Yes
1936-2625Z	International Journal of Clinical and Experimental Pathology	IJCEP	http://www.ijcep.com	e-Century Publishing Corporation	English	1936-2625		experimental pathology,clinical pathology,anatomic pathology,human disease	2008		2008-03-06T10:53:16Z	Pathology,Medicine,Pathology,Medicine (General),Health Sciences	United States	Y	http://www.ijcep.com/guidelines.html		Yes
1687-7578Z1687-7586	International Journal of Digital Multimedia Broadcasting		http://www.hindawi.com/journals/ijdmb/	Hindawi Publishing Corporation	English	1687-7578	1687-7586	multimedia,multi-standards	2008		2008-10-13T11:48:38Z	Telecommunication,Electrical engineering. Electronics. Nuclear engineering,Technology,Media and communication,Social Sciences	Egypt	Y	http://www.hindawi.com/journals/ijdmb/apc/	by	Yes
1911-1576Z	PhaenEx : Journal of Existential and Phenomenological Theory and Culture		http://www.phaenex.uwindsor.ca	University of Windsor	English,French	1911-1576		phenomenology,existentialism,continental philosophy,social theory	2006		2008-03-10T13:55:40Z	Philosophy (General),Philosophy. Psychology. Religion,Philosophy,Philosophy and Religion	Canada	N	http://www.phaenex.uwindsor.ca/ojs/leddy/index.php/phaenex/about/submissions/guidelines		Yes
1981-3821Z	Brazilian Political Science Review	BPSR	http://www.bpsr.org.br	Associação Brasileira de Ciência Política	English	1981-3821		political science,international relations,Brazil	2007		2008-03-11T09:20:10Z	Political science (General),Political science,Political Science,Law and Political Science	Brazil	N	http://www.bpsr.org.br/english/revista/instrucoes.htm		Yes
0120-0534Z	Revista Latinoamericana de Psicología		http://www.redalyc.org/revista.oa?id=805	Fundación Universitaria Konrad Lorenz	Spanish	0120-0534		psychology	1969		2008-03-12T09:32:25Z	Psychology,Philosophy. Psychology. Religion,Psychology,Social Sciences	Colombia	N	http://redalyc.org/redalyc/media/normas/normcol805.html		Yes
1575-9733Z	Cuadernos de Documentación Multimedia		http://revistas.ucm.es/index.php/CDMU	Universidad Complutense	Spanish	1575-9733		digitalization,multimedia,semantic web,digital archives,new technologies,documentation	2003		2008-03-13T09:43:41Z	Bibliography. Library science. Information resources,Library and Information Science,Social Sciences,Information technology,Industrial engineering. Management engineering,Technology (General),Technology,Computer Science,Technology and Engineering	Spain	N	http://revistas.ucm.es/index.php/CDMU/about/submissions#authorGuidelines		Yes
1735-3327Z2008-0255	Dental Research Journal	DRJ	http://journals.mui.ac.ir/drj	Isfahan University of Medical Sciences	English	1735-3327	2008-0255	dental research,dentistry	2005		2008-03-18T15:48:17Z	Dentistry,Medicine,Dentistry,Health Sciences	Iran	N	http://drj.mui.ac.ir/index.php/drj/about/submissions#authorGuidelines	by	Yes
1012-7089Z	Terra Nueva Etapa		http://www.redalyc.org/revista.oa?id=721	Universidad Central de Venezuela	Spanish	1012-7089		geographic theory,geographic methodology	1999		2008-03-25T14:41:09Z	Geography (General),Geography. Anthropology. Recreation,Geography,Earth and Environmental Sciences	Venezuela	Y	http://redalyc.org/redalyc/media/normas/normcol721.html		Yes
0973-6131Z2231-2714	International Journal of Yoga	IJOY	http://www.ijoy.org.in/	Medknow Publications	English	0973-6131	2231-2714	yoga research	2008		2008-03-25T15:54:19Z	Public aspects of medicine,Medicine,Public Health,Health Sciences	India	N	http://www.ijoy.org.in/contributors.asp	by-nc-sa	Yes
1874-8368Z	Open Construction & Building Technology Journal		http://www.bentham.org/open/tobctj/	Bentham open	English	1874-8368		buildings,building construction	2007		2008-03-27T13:45:18Z	Building construction,Technology,Construction,Technology and Engineering	Netherlands	Y	http://www.benthamscience.com/open/tobctj/MSandI.htm		Yes
1874-2858Z	Open Microbiology Journal		http://www.bentham.org/open/tomicroj/	Bentham open	English	1874-2858		genetics,molecular microbiology,clinical microbiology	2007		2008-03-28T10:52:15Z	Microbiology,Science,Microbiology,Biology,Biology and Life Sciences	United States	Y	http://www.benthamscience.com/open/tomicroj/MSandI.htm		Yes
1887-1542Z	eLearning Papers		http://openeducationeuropa.eu/en/elearning_papers	elearningeuropa.info	English	1887-1542		lifelong learning,ICT for learning,blended learning,technology enhanced learning	2006		2008-03-28T17:35:33Z	Special aspects of education,Education,Education,Social Sciences	Spain	N	http://openeducationeuropa.eu/en/elearning_papers/instructions_for_writers		Yes
1970-321XZ1970-3201	Neuropsychological Trends		http://www.ledonline.it/NeuropsychologicalTrends/index.html	LED Edizioni Universitarie	English	1970-321X	1970-3201	neuropsychology,neuropsychiatry,clinical neuropsychology,brain research,psychophysiology	2007		2008-04-07T16:00:33Z	Neurosciences. Biological psychiatry. Neuropsychiatry,Internal medicine,Medicine,Neurology,Medicine (General),Health Sciences	Italy	N	http://www.ledonline.it/NeuropsychologicalTrends/index.html?/NeuropsychologicalTrends/authors.html		Yes
1908-7330Z	Kritike : an Online Journal of Philosophy		http://www.kritike.org	kritike.org	English	1908-7330		continental philosophy,analytic philosophy,East-West comparative philosophy	2007		2008-04-09T11:40:30Z	Philosophy (General),Philosophy. Psychology. Religion,Philosophy,Philosophy and Religion	Philippines	N	http://www.kritike.org/for_contributors.html		Yes
0334-2026Z	Min-Ad : Israel Studies in Musicology Online		http://www.biu.ac.il/hu/mu/min-ad/	Min-Ad	English,Hebrew	0334-2026		musicology,Jewish Music,music education,ethnomusicology	2002		2008-04-10T15:05:47Z	Music,Music and books on Music,Music,Arts and Architecture	Israel	N	http://www.biu.ac.il/hu/mu/min-ad04/guidelines.html		Yes
0211-5735Z2340-2733	Revista de la Asociación Española de Neuropsiquiatría		http://www.revistaaen.es/	Asociación Española de Neuropsiquiatría	Spanish	0211-5735	2340-2733	neuropsychiatry,mental health,psychiatry,psychology	1981		2008-09-02T15:02:15Z	Psychiatry,Neurology. Diseases of the nervous system,Neurosciences. Biological psychiatry. Neuropsychiatry,Internal medicine,Medicine,Psychiatry,Medicine (General),Health Sciences	Spain	N	http://revistaaen.es/index.php/aen/about/submissions		Yes
1874-3315Z	Open Agriculture Journal		http://www.bentham.org/open/toasj/	Bentham open	English	1874-3315		crop protection,soil science	2007		2008-05-13T14:29:05Z	Agriculture (General),Agriculture,Agriculture (General),Agriculture and Food Sciences	United States	Y	http://www.benthamscience.com/open/toasj/MSandI.htm		Yes
1138-2783Z1390-3306	Revista Iberoamericana de Educación a Distancia (RIED)		http://www.utpl.edu.ec/ried/	Asociación Iberoamericana de Educación Superior a Distancia	Spanish	1138-2783	1390-3306	distance education,e-learning	1998		2008-06-27T13:24:48Z	Education (General),Education,Education,Social Sciences	Spain	N	http://www.utpl.edu.ec/ried/index.php?option=com_content&task=view&id=28&Itemid=162		Yes
0430-5027Z	Finisterra : Revista Portuguesa de Geografia		http://www.ceg.ul.pt/finisterra	Universidade de Lisboa	Portuguese,English,Spanish,French,Italian	0430-5027		physical geography,human geography,regional development,urban planning,regional planning,GIS	1982		2008-04-13T14:09:15Z	Geography (General),Geography. Anthropology. Recreation,Geography,Earth and Environmental Sciences	Portugal	N	http://www.ceg.ul.pt/finisterra/		Yes
0018-215XZ1988-4265	Hispania Sacra : Revista de Historia Eclesiástica		http://hispaniasacra.revistas.csic.es/index.php/hispaniasacra/index	Consejo Superior de Investigaciones Científicas	Spanish,English,Portuguese,Italian,French	0018-215X	1988-4265	Hispanic civilization,historiography,history of religion,christianity,religious traditions,anthropology,cultural studies	2001		2008-04-13T14:09:25Z	History (General),History (General) and history of Europe,History,History and Archaeology,Social sciences (General),Social Sciences,Social Sciences	Spain	N	http://hispaniasacra.revistas.csic.es/index.php/hispaniasacra/about/submissions#authorGuidelines	by-nc	Yes
1519-8634Z	Holos Environment		http://www.periodicos.rc.biblioteca.unesp.br/index.php/holos	Universidade Estadual Paulista	Portuguese,English,Spanish	1519-8634		environmental sciences,environment,water resources,ecology,agricultural sciences,biology,environmental engineering	2001		2008-08-18T16:16:33Z	Environmental sciences,Geography. Anthropology. Recreation,Environmental Sciences,Earth and Environmental Sciences	Brazil	N	http://www.periodicos.rc.biblioteca.unesp.br/index.php/holos/about/submissions#authorGuidelines	by-nc-nd	Yes
1306-0015Z	Turk Pediatri Arşivi	Turkish Pediatrics Archive	http://www.turkpediatriarsivi.com/eng/index.asp	Galenos Yayincilik	Turkish	1306-0015		medicine,pediatrics,neonatology	2002		2008-08-07T09:44:44Z	Pediatrics,Medicine,Pediatrics,Medicine (General),Health Sciences	Turkey	N	http://www.turkpediatriarsivi.com/tr/sayfalar/13/Yazarlara-Bilgi-	by-nc	Yes
1888-4296Z	Journal of Optometry		http://www.journalofoptometry.org/	Spanish Council of Optometry	English	1888-4296		optometry,ophthalmic optics,ocular surface,visual science	2008		2008-08-06T11:51:24Z	Ophthalmology,Medicine,Ophthalmology,Medicine (General),Health Sciences	Spain	N	http://apps.elsevier.es/ficheros/NormOrga/310normas.pdf		Yes
0974-2891Z	International Journal of Cyber Criminology	IJCC	http://www.cybercrimejournal.co.nr	International Journal of Cyber Criminology	English	0974-2891		cyber crime,cyber criminal behavior,cyber victims,cyber laws,cyber investigations	2007		2008-05-08T13:07:51Z	Social pathology. Social and public welfare. Criminology,Social Sciences,Social and Public Welfare,Sociology,Social Sciences	India	N	http://www.cybercrimejournal.co.nr	by-nc-sa	Yes
1990-7974Z1990-7982	Journal of Nepal Paediatric Society	Nepas Journal	http://www.nepjol.info/index.php/JNPS	Nepal Paediatric Society	English	1990-7974	1990-7982	children,Nepal,health,paediatrics,Nepalese children	2007		2009-02-09T12:49:55Z	Pediatrics,Medicine,Pediatrics,Medicine (General),Health Sciences	Nepal	N	http://www.nepjol.info/index.php/JNPS/about/submissions#authorGuidelines		Yes
1935-2727Z1935-2735	PLoS Neglected Tropical Diseases		http://www.plosntds.org/home.action	Public Library of Science	English	1935-2727	1935-2735	elephantiasis,river blindness,leprosy,hookworm,schistosomiasis,African sleeping sickness	2007		2008-04-22T15:53:34Z	Special situations and conditions,Internal medicine,Medicine,Internal medicine,Medicine (General),Health Sciences	United States	Y	http://www.plosntds.org/static/guidelines.action	by	Yes
1874-2483Z	Open Energy and Fuels Journal		http://www.bentham.org/open/toefj/	Bentham open	English	1874-2483		combustion science,fuel science,energy research	2008		2008-07-25T15:00:19Z	Chemical technology,Technology,Chemical Technology,Technology and Engineering	United States	Y	http://www.benthamscience.com/open/toefj/MSandI.htm		Yes
1682-2765Z	Journal of Research in Health Sciences	JRHS	http://jrhs.umsha.ac.ir/index.php/JRHS/issue/archive	Hamadan University of Medical Sciences	English	1682-2765		health sciences	2005		2008-07-28T13:29:49Z	Public aspects of medicine,Medicine,Public Health,Health Sciences	Iran	N	http://jrhs.umsha.ac.ir/index.php/JRHS/about/submissions#authorGuidelines		Yes
0189-6725Z0974-5998	African Journal of Paediatric Surgery		http://www.afrjpaedsurg.org/	Medknow Publications	English	0189-6725	0974-5998	surgery,newborns,infants,children	2008		2008-07-29T10:43:43Z	Pediatrics,Medicine,Pediatrics,Medicine (General),Health Sciences,Surgery,Medicine,Surgery,Medicine (General),Health Sciences	India	N	http://www.afrjpaedsurg.org/contributors.asp	by-nc-sa	Yes
[truncated: 8,832 more rows]

## Sheet: Pre-cleanup
ISSN-combo	Journal title	Journal URL	Alternative title	Journal ISSN (print version)	Journal EISSN (online version)	Publisher	Society or institution	Platform, host or aggregator	Country of publisher	Journal article processing charges (APCs)	APC information URL	APC amount	Currency	Journal article submission fee	Submission fee URL	Submission fee amount	Submission fee currency	Number of articles publish in the last calendar year	Number of articles information URL	Journal waiver policy (for developing country authors etc)	Waiver policy information URL	Digital archiving policy or program(s)	Archiving: national library	Archiving: other	Archiving infomation URL	Journal full-text crawl permission	Permanent article identifiers	Journal provides download statistics	Download statistics information URL	First calendar year journal provided online Open Access content	Full text formats	Keywords	Full text language	URL for the Editorial Board page	Review process	Review process information URL	URL for journal's aims & scope	URL for journal's instructions for authors	Journal plagiarism screening policy	Plagiarism information URL	Average number of weeks between submission and publication	URL for journal's Open Access statement	Machine-readable CC licensing information embedded or displayed in articles	URL to an example page with embedded licensing information	Journal license	License attributes	URL for license terms	Does this journal allow unrestricted reuse in compliance with BOAI?	Deposit policy directory
[truncated: 11,644 more rows]
[truncated: 8 more columns]

[truncated: 26 more sheets: Post clean-up, Publisher size pre clean-up, Publisher size Lost, Publisher size kept, Table 1, Table 2&4, Table 3, Table 5, Table 6, DOAJ removed list, Pivot area, Large publishers - journals los, Table 2 (3), Table 7 & 8, Table 9, RoMEO Journal policy condensed, Table 11, Japan list, USA, USA list …]
